# Supplementary material for: Metal-free catalytic nucleophilic substitution of primary alcohols with secondary phosphine oxides
Source: Royal Society of Chemistry journal article supplement (doi:10.1039/d4gc04409f), 2024-11-27

## Electronic Supplementary Information

### Metal-free Catalytic Nucleophilic Substitution of Primary Alcohols with Secondary Phosphine Oxides

Xiantao Ma,<sup>\*a</sup> Xiaoyu Yan,<sup>a</sup> Jing Yu,<sup>a</sup> Jiarui Guo,<sup>a</sup> Jiakun Bian,<sup>a</sup> Ran Yan,<sup>a</sup> Qing Xu<sup>\*b,c</sup> and Li-Biao Han<sup>\*b,d</sup>

<sup>a</sup> College of Chemistry and Chemical Engineering, Green Catalysis & Synthesis Key Laboratory of Xinyang City, Xinyang Normal University, Xinyang, Henan 464000, China

<sup>b</sup> Zhejiang Yangfan New Materials Company, Ltd., Shangyu, Zhejiang 312369, China

<sup>c</sup> College of Chemistry and Materials Engineering, Wenzhou University, Wenzhou, Zhejiang 325035, China

<sup>d</sup> College of Chemistry & Chemical Engineering, Shaoxing University, Shaoxing, Zhejiang 312000, China

\*Emails: [xiantaoma@126.com](mailto:xiantaoma@126.com); [qing-xu@wzu.edu.cn](mailto:qing-xu@wzu.edu.cn); [h1b@shoufuchem.com](mailto:h1b@shoufuchem.com)

#### Table of contents

|                                                                                                                                  |     |
|----------------------------------------------------------------------------------------------------------------------------------|-----|
| 1. General information .....                                                                                                     | S2  |
| 2. Control experiments for Mechanistic Studies .....                                                                             | S3  |
| 2.1 The reaction of benzyl alcohol (1a) and TMSI (Eq. 5 in the text) .....                                                       | S3  |
| 2.2 The reaction of dibenzyl ether (7a) and diphenylphosphine oxide (2a) (Eq. 6 in the text) .....                               | S5  |
| 2.3 The reaction of benzyl bromide (8a-Br) and diphenylphosphine oxide (2a) (Eq. 7 in the text) .....                            | S7  |
| 2.4 The MA rearrangement of benzyl diphenylphosphinite (9a) (Eq. 8 in the text) .....                                            | S11 |
| 2.5 The reaction of dibenzyl ether (7a) and TMSI (Eq. 9 in the text) .....                                                       | S11 |
| 2.5 The observation of possible intermediate 10a (Eq. 10 in the text) .....                                                      | S13 |
| 2.6 The reaction of benzyl alcohol and <sup>18</sup> O-diphenylphosphine oxide ( <sup>18</sup> O-2a) (Eq. 11 in the text) .....  | S18 |
| 2.7 The reaction of <sup>18</sup> O-benzyl alcohol ( <sup>18</sup> O-1a) and diphenylphosphine oxide (2a) (Eq. 12 in text) ..... | S22 |
| 3. Typical Procedure and Characterization of the Products .....                                                                  | S24 |
| 4. Copies of the <sup>1</sup> H, <sup>13</sup> C and <sup>31</sup> P NMR Spectra of the Products .....                           | S38 |

## 1. General information

Unless otherwise noted, all chemicals were purchased and used without further purification and all reactions were carried out in sealed Schlenk tubes under N<sub>2</sub> and then monitored by TLC and/or GC-MS. <sup>1</sup>H, <sup>13</sup>C and <sup>31</sup>P NMR spectra were measured on a JNM-ECZ600R/S3 (Jeol, Japan) (600, 151 and 243 MHz for <sup>1</sup>H, <sup>13</sup>C and <sup>31</sup>P NMR, respectively) using CDCl<sub>3</sub> as the solvent. Chemical shifts for <sup>1</sup>H, <sup>13</sup>C and <sup>31</sup>P NMR were referred to internal Me<sub>4</sub>Si (0 ppm) as the standard. Mass spectra were measured on an Agilent GC-MS-7890A/5975C Plus spectrometer (EI). HRMS were recorded on a LC-TOF spectrometer (Xevo G2-XS QToF) using ESI techniques. <sup>18</sup>O contents of <sup>18</sup>O-benzyl alcohol was measured on an Agilent HRGC spectrometer (8890-7250) using EI techniques at Zhejiang University.

## 2. Control experiments for Mechanistic Studies

### 2.1 The reaction of benzyl alcohol (1a) and TMSI (Eq. 5 in the text)

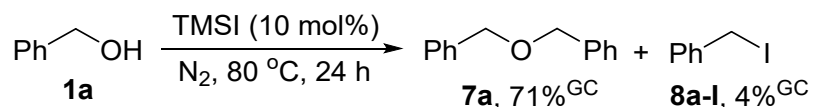

**Detailed Procedure:** The mixture of benzyl alcohol **1a** (62.1  $\mu\text{L}$ , 0.60 mmol), TMSI (7.1  $\mu\text{L}$ , 0.05 mmol) was directly sealed in a Schlenk tube (10 mL) under nitrogen, and then stirred at 80  $^\circ\text{C}$  for 24 h. The reaction mixture was analyzed by GC-MS, showing the generation of **7a** and **8a-I** in 71% and 4% yield, respectively.

#### GC spectra

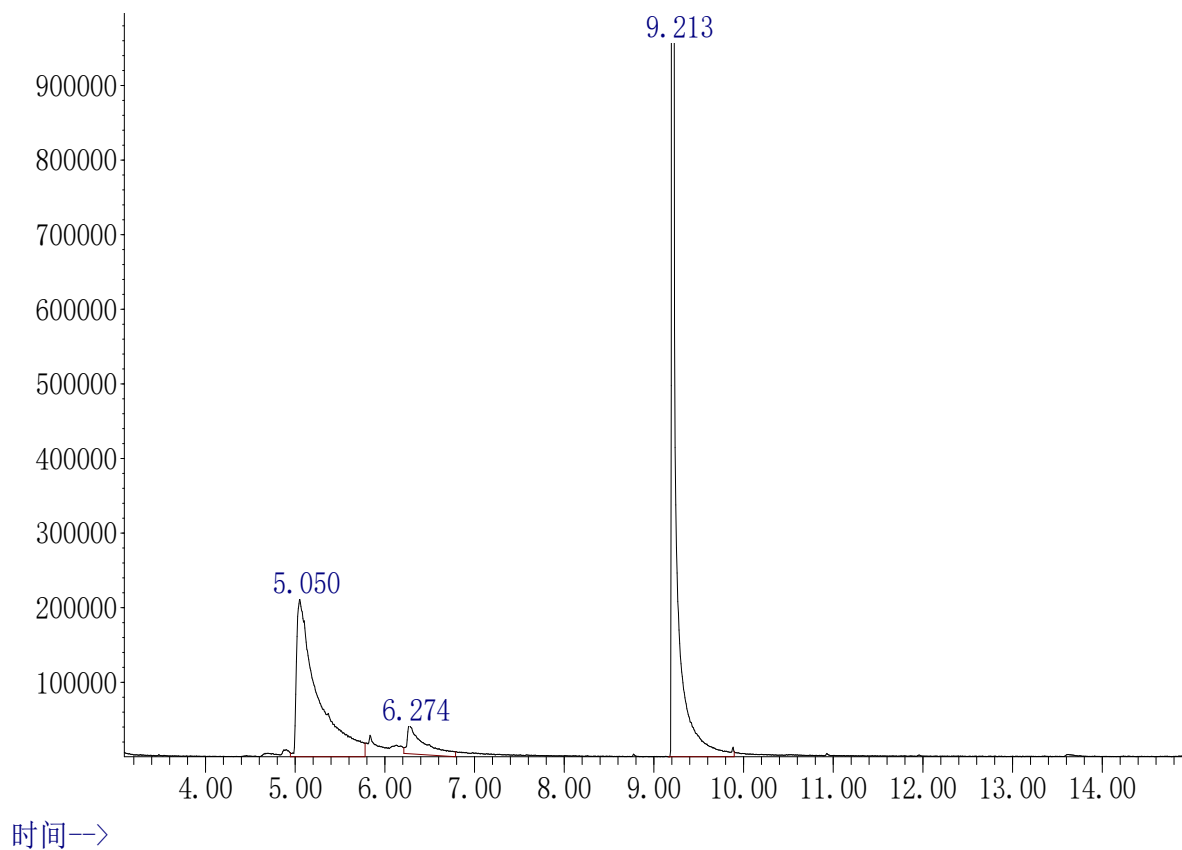

| Run | Time /min | Start scanning | Peak scanning | Stop scanning | Peak type | Hight       | Correction area | Correction maximum% | Total %       |
|-----|-----------|----------------|---------------|---------------|-----------|-------------|-----------------|---------------------|---------------|
| 1   | 5.050     | 256            | 270           | 370           | M         | 212372      | 33978668        | 34.91%              | <b>24.915</b> |
| 2   | 6.274     | 430            | 438           | 509           | M         | 38160       | 5059223         | 5.20%               | <b>3.710</b>  |
| 3   | 9.213     | 836            | 843           | 937           | M         | 711929<br>2 | 97338456        | 100.00%             | <b>71.375</b> |

## MS Spectra

T=5.050 min, m/z=108, Ph-CH<sub>2</sub>-OH (**1a**)

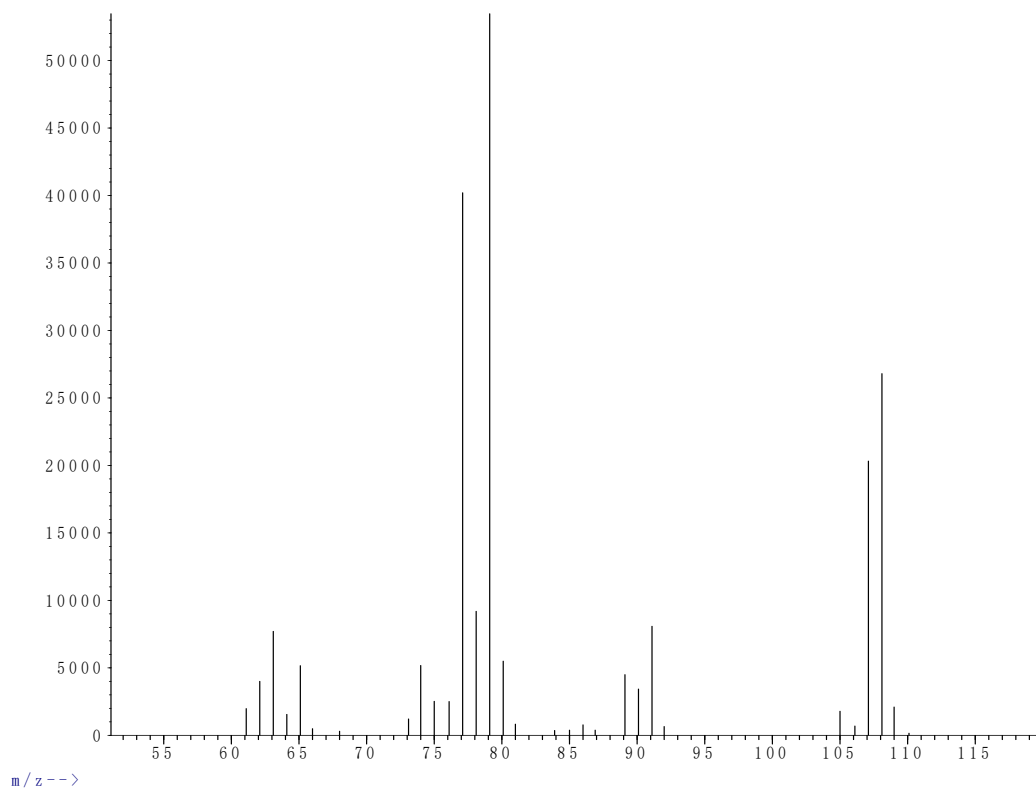

T=6.274 min, m/z=218, Ph-CH<sub>2</sub>-I (**8a-I**)

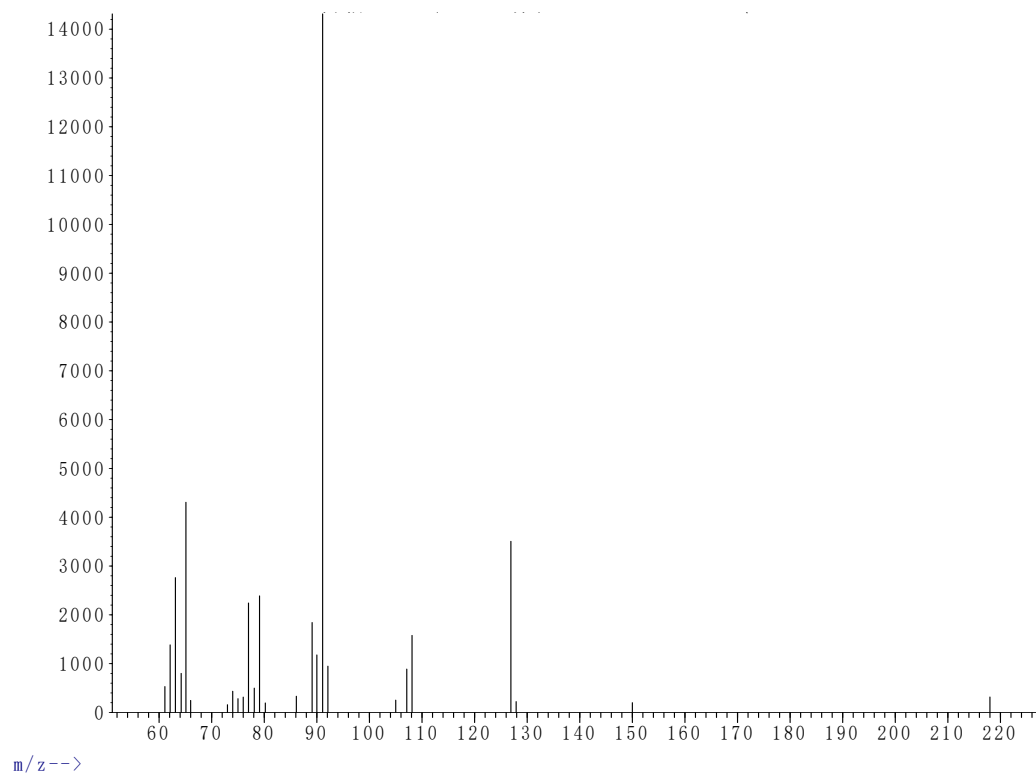

T=9.213 min, m/z=198, c1ccc(cc1)COc2ccccc2 (**7a**)

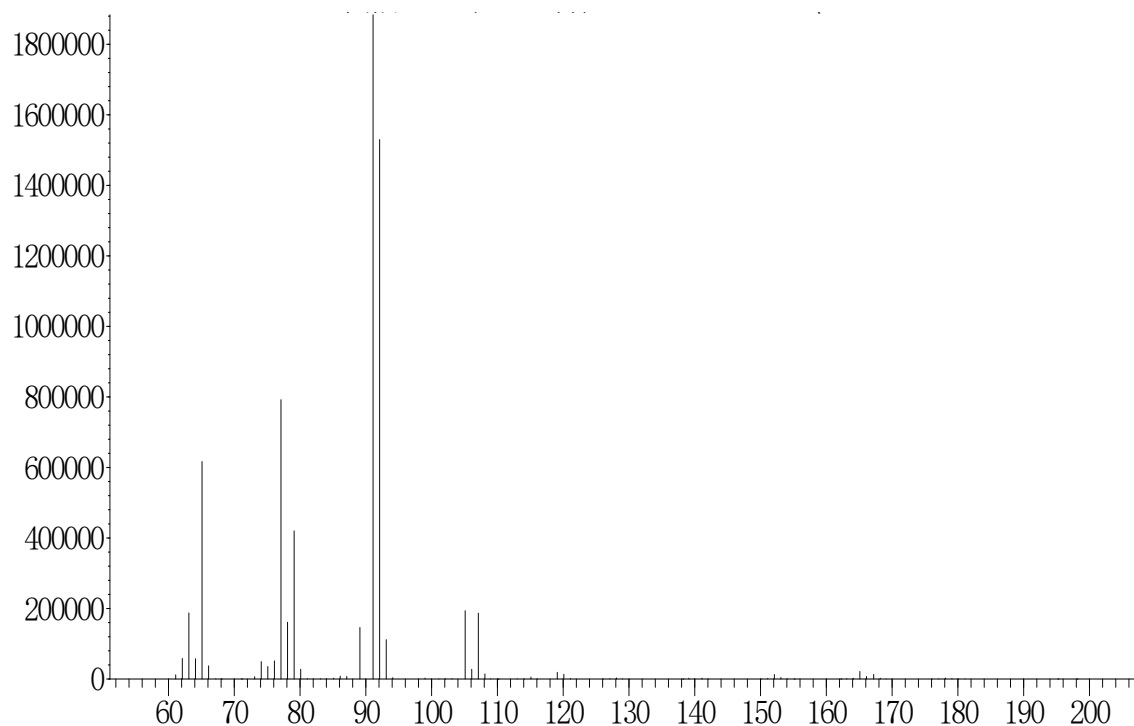

m/z →

**Results and Discussion:** Benzyl alcohol **1a** is converted to dibenzyl ether **7a** and benzyl iodide **8a-I** under standard conditions, and it is preliminarily hypothesized that dibenzyl ether **7a** and benzyl iodide **8a-I** may be the key intermediates

## 2.2 The reaction of dibenzyl ether (**7a**) and diphenylphosphine oxide (**2a**) (Eq. 6 in the text)

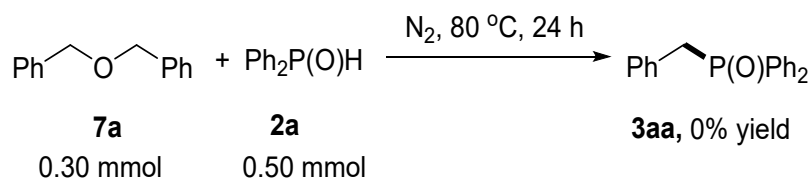

**Detailed Procedure:** The mixture of dibenzyl ether **7a** (57  $\mu\text{L}$ , 0.30 mmol), diphenylphosphine oxide **2a** (101.1 mg, 0.50 mmol) was directly sealed in a Schlenk tube (10 mL) under nitrogen, and then stirred at 80  $^\circ\text{C}$  for 24 h. The reaction mixture was analyzed by TLC/GC-MS.

## GC spectra

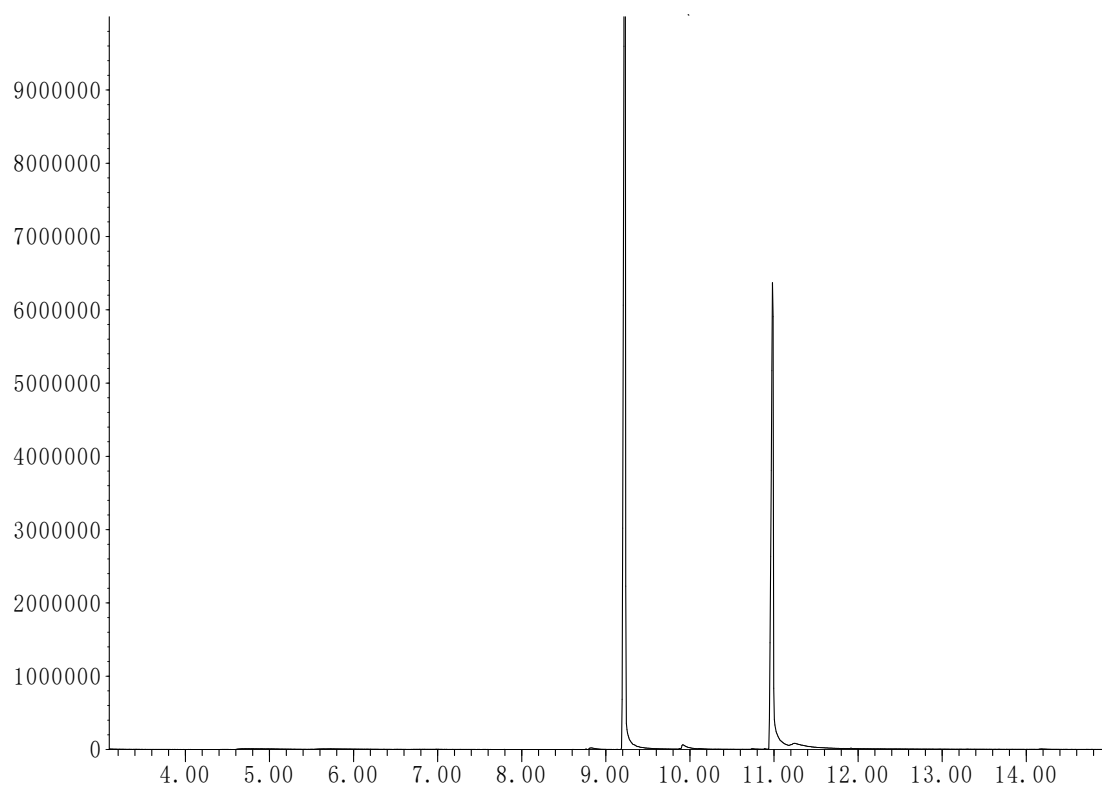

时间-->

## MS Spectra

T=9.230 min,  $m/z=198$ , c1ccc(cc1)COCc2ccccc2 (7a)

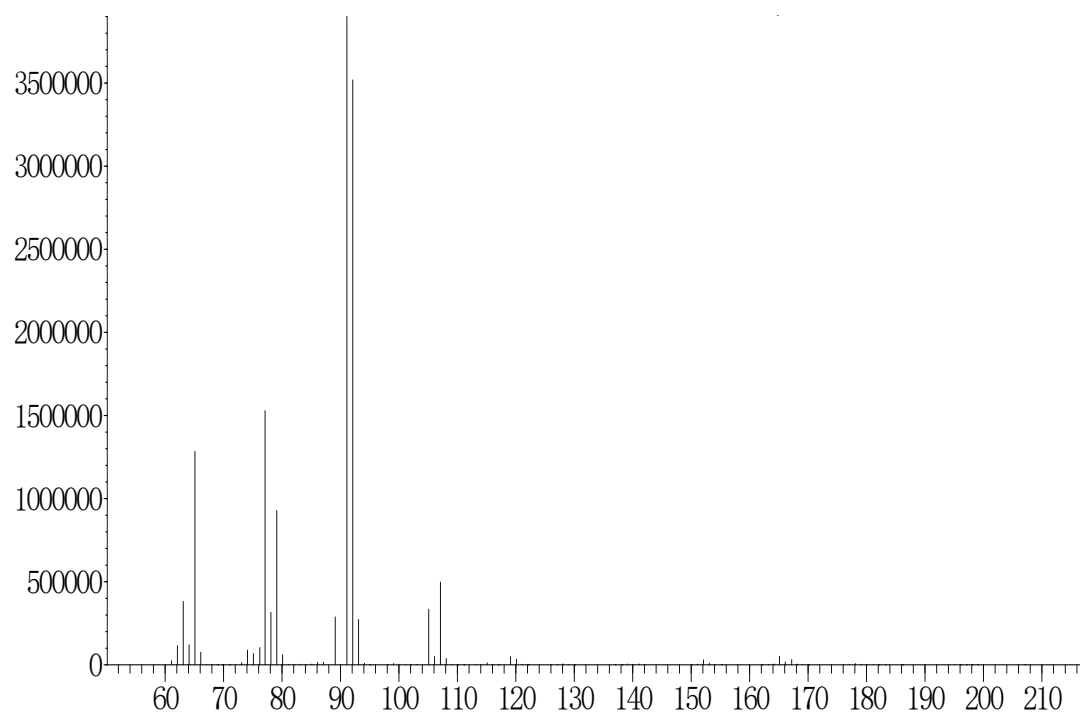

$m/z$ -->

T=10.974 min, m/z=202, Ph<sub>2</sub>P(O)H (**2a**)

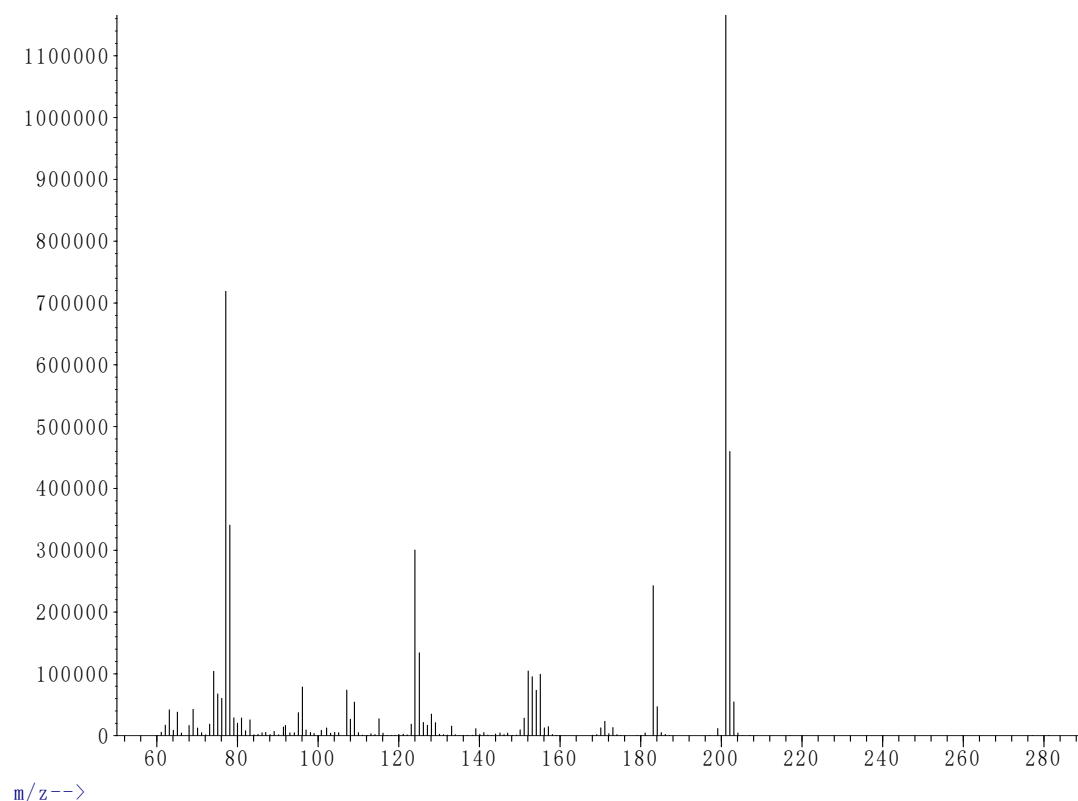

**Results and Discussion:** The reaction of dibenzyl ether **7a** and diphenylphosphine oxide **2a** failed to produce the target product **3aa**. Therefore, dibenzyl ether **7a** is not the key reaction intermediate.

### 2.3 The reaction of benzyl bromide (**8a-Br**) and diphenylphosphine oxide (**2a**) (Eq. 7 in the text)

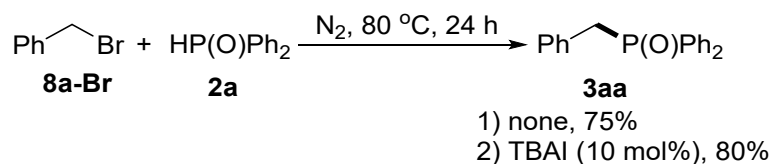

**Detailed Procedure:** The mixture of benzyl bromide **8a-Br** (71.3  $\mu\text{L}$ , 0.60 mmol), diphenylphosphine oxide **2a** (101.1 mg, 0.50 mmol) and TBAI (0 or 10 mol%) was directly sealed in a Schlenk tube (10 mL) under nitrogen, and then stirred at 80  $^\circ\text{C}$  for 24 h. The reaction mixture was analyzed by TLC/GC-MS, and then purified by flash column chromatography on silica gel using dichloromethane and methanol (0~ 1/1) as the eluent, giving **3aa** in 75% or 80% isolated yield.

## GC spectra

TBAI (0 mol%):

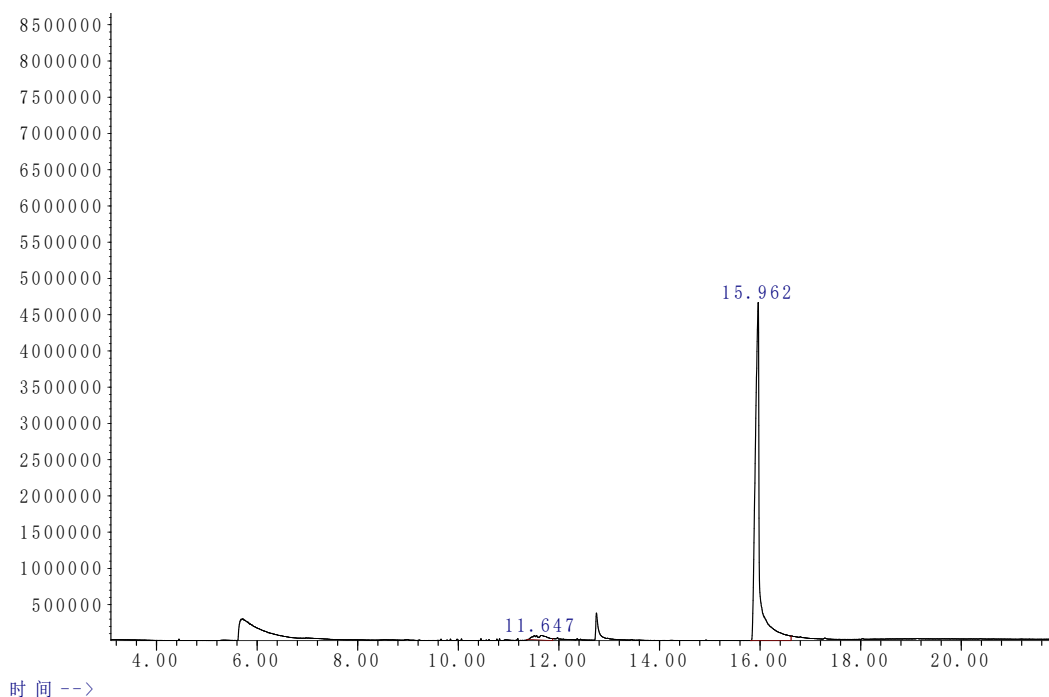

| Run | Time /min | Start scanning | Peak scanning | Stop scanning | Peak type | Hight   | Correction area | Correction maximum% | Total %       |
|-----|-----------|----------------|---------------|---------------|-----------|---------|-----------------|---------------------|---------------|
| 1   | 11.647    | 1821           | 1882          | 1932          | M         | 69876   | 12009854        | 4.15%               | <b>3.985</b>  |
| 2   | 15.962    | 2798           | 2831          | 2974          | M         | 4719049 | 289404309       | 96.015%             | <b>96.015</b> |

## MS Spectra

T=11.647 min, m/z=202, Ph<sub>2</sub>P(O)H (**2a**)

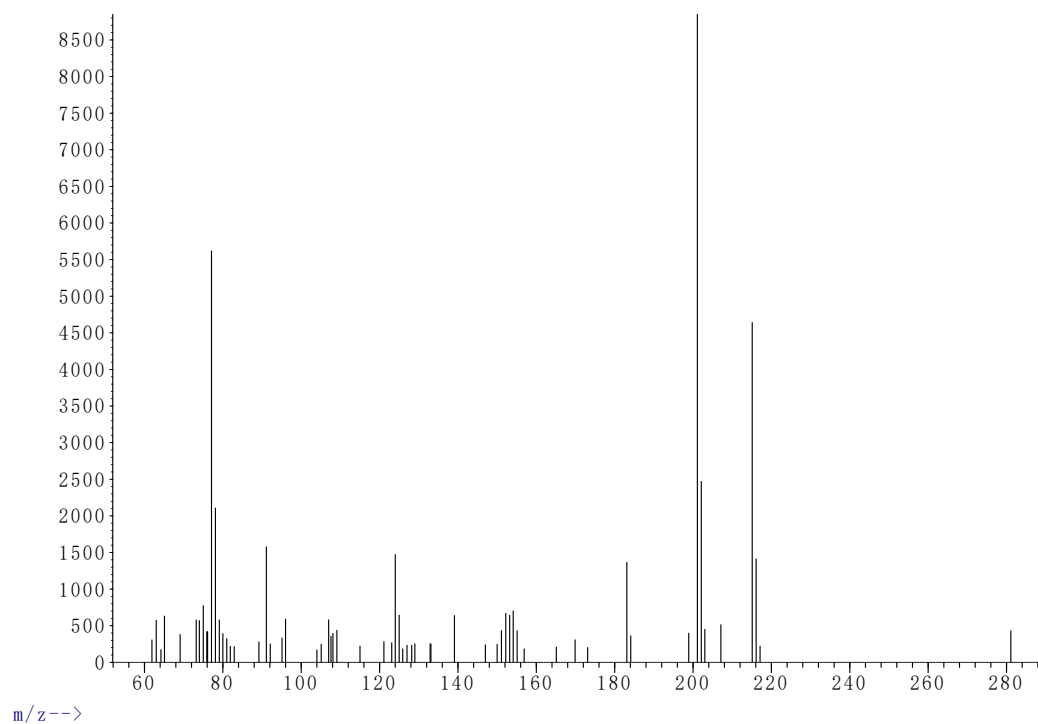



T=15.962 min, m/z=292, c1ccc(cc1)P(=O)(c2ccccc2)c3ccccc3 (**3aa**)

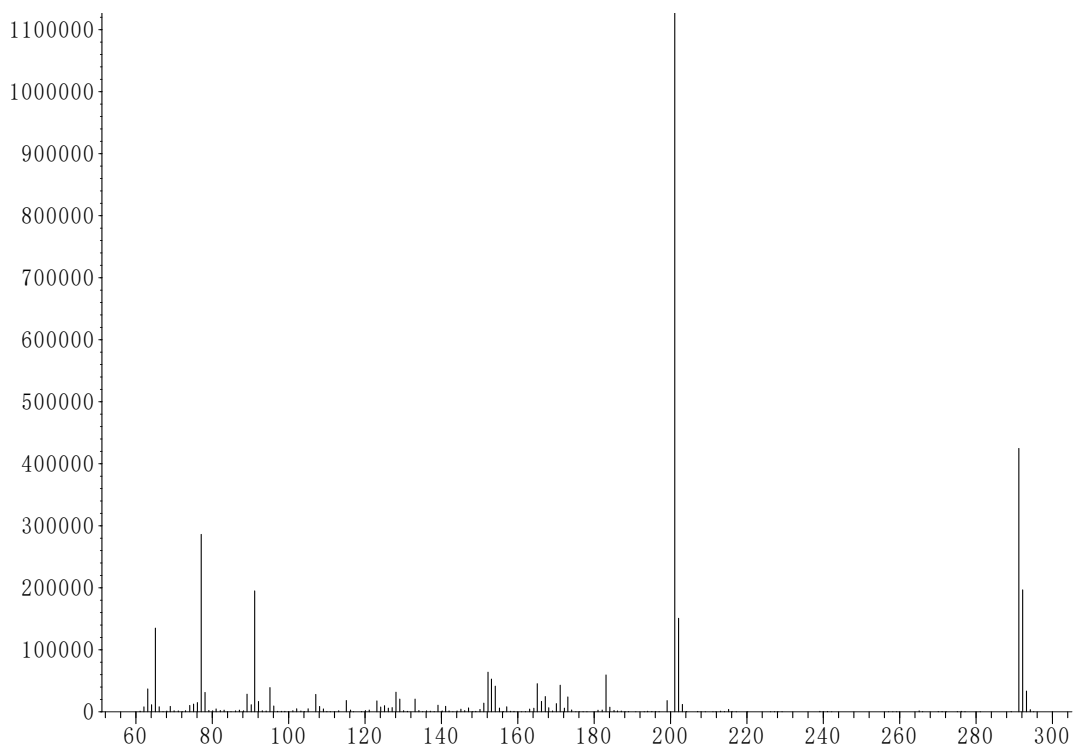

m/z-->

### GC spectra

TBAI (10 mol%):

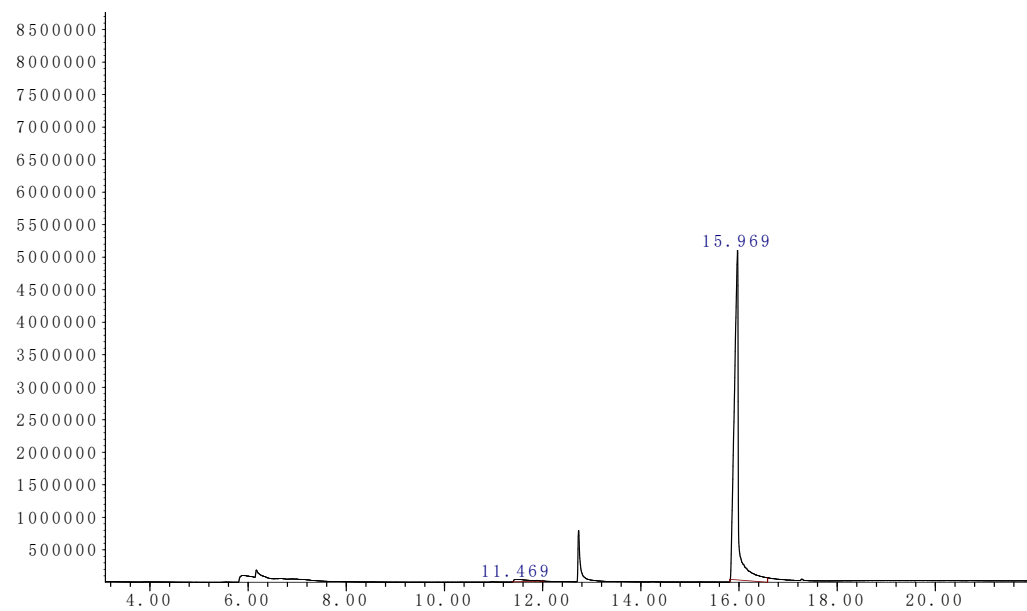

时间-->

| Run | Time /min | Start scanning | Peak scanning | Stop scanning | Peak type | Hight   | Correction area | Correction maximum% | Total %       |
|-----|-----------|----------------|---------------|---------------|-----------|---------|-----------------|---------------------|---------------|
| 1   | 11.469    | 1823           | 1843          | 1964          | M         | 42086   | 7413146         | 2.36%               | <b>2.301</b>  |
| 2   | 15.969    | 2798           | 2832          | 2967          | M         | 5079017 | 314737801       | 100.00%             | <b>97.699</b> |

## MS Spectra

T=11.496 min, m/z=202, Ph<sub>2</sub>P(O)H (**2a**)

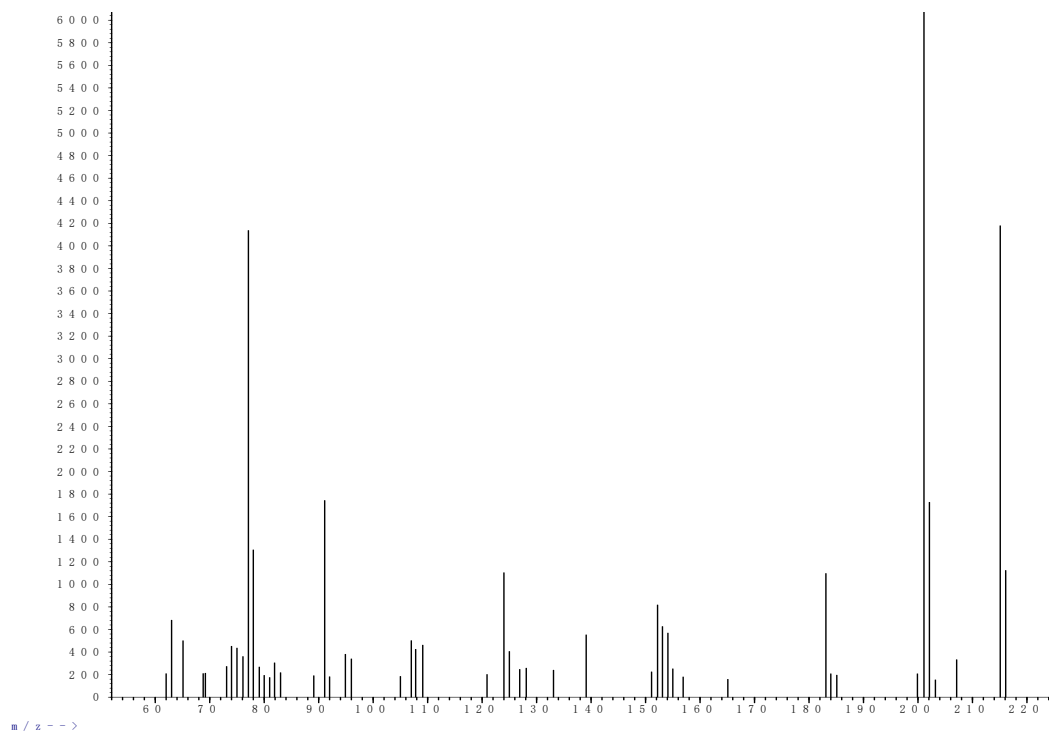

T=15.969 min, m/z=292, Ph-CH<sub>2</sub>-P(O)Ph<sub>2</sub> (**3aa**)

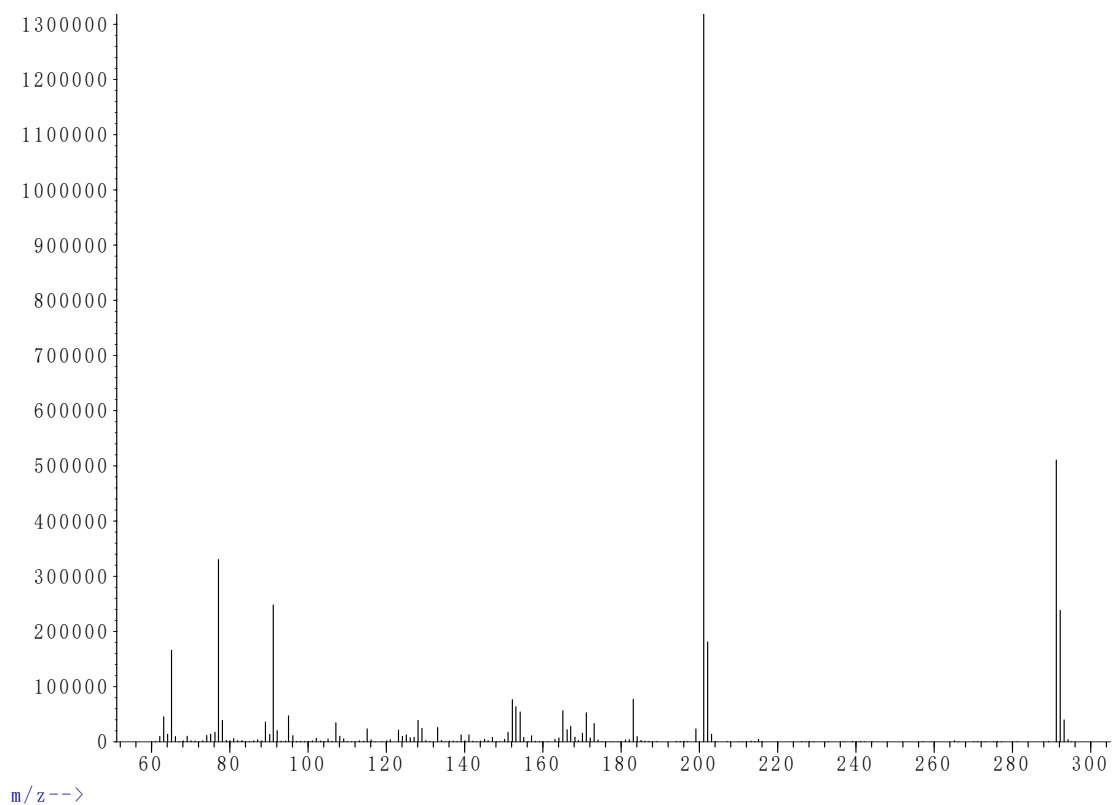

**Results and Discussion:** Benzyl iodide (**8a-I**) generated from the reaction of

PhCH<sub>2</sub>Br (**8a-Br**) with TBAI can react smoothly with diphenylphosphine oxide (**2a**) to give the target product **3aa**, therefore, benzyl iodine **8a-I** may be the key reaction intermediate.

#### 2.4 The MA rearrangement of benzyl diphenylphosphinite (**9a**) (Eq. 8 in the text)

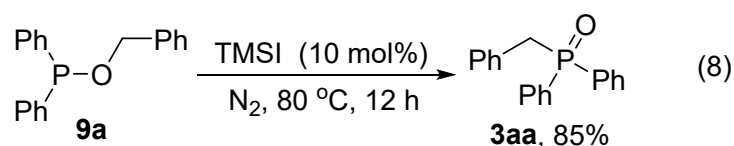

**Detailed Procedure:** The mixture of benzyl diphenylphosphinite (**9a**) (58.4 mg, 0.20 mmol), TMSI (2.8  $\mu\text{L}$ , 10 mol%, 0.020 mmol) was directly sealed in a Schlenk tube (10 mL) under nitrogen, and then stirred at 80  $^\circ\text{C}$  for 12 h. The reaction mixture was analyzed by TLC/GC-MS, and then purified by flash column chromatography on silica gel using dichloromethane and methanol (0~ 1/1) as the eluent, giving **3aa** in 85% isolated yield.

#### 2.5 The reaction of dibenzyl ether (**7a**) and TMSI (Eq. 9 in the text)

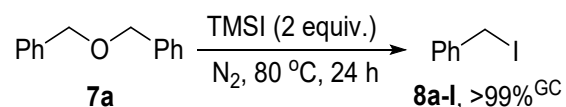

**Detailed Procedure:** The mixture of dibenzyl ether **7a** (57  $\mu\text{L}$ , 0.30 mmol), TMSI (85.4  $\mu\text{L}$ , 0.60 mmol) was directly sealed in a Schlenk tube (10 mL) under nitrogen, and then stirred at 80  $^\circ\text{C}$  for 24 h. The reaction mixture was analyzed by TLC/GC-MS.

**GC spectra:**

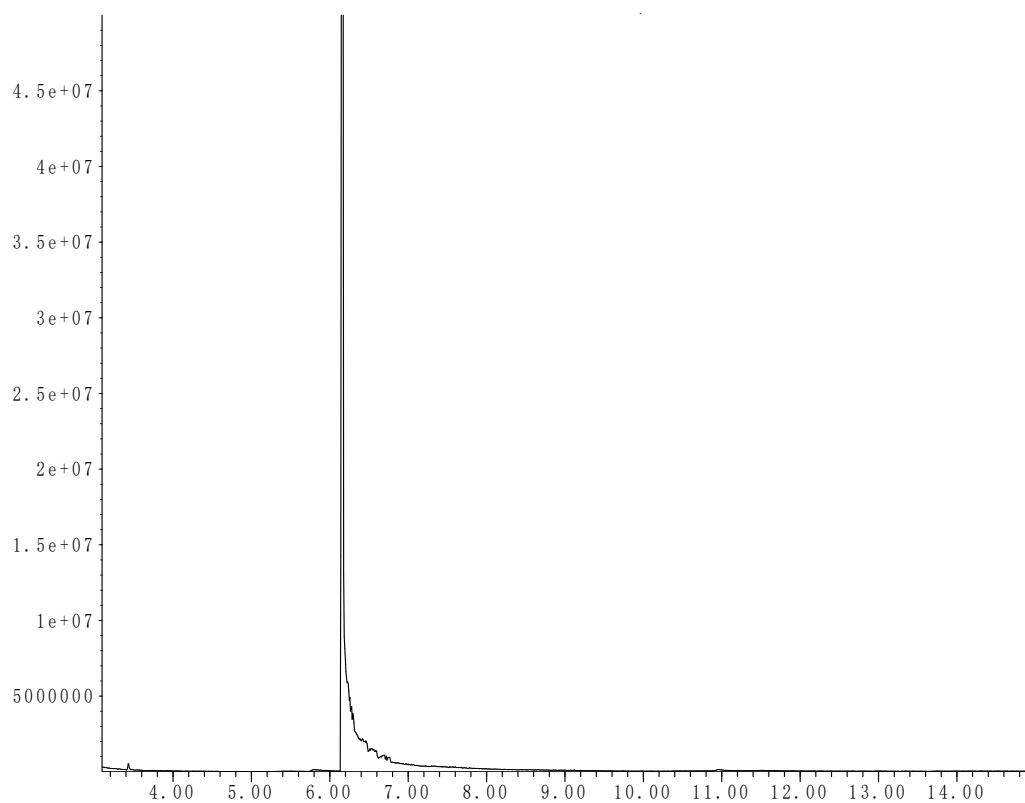

时间 -->

### MS Spectra

T=6.162 min, m/z=218, c1ccc(cc1)C#N (8a-I)

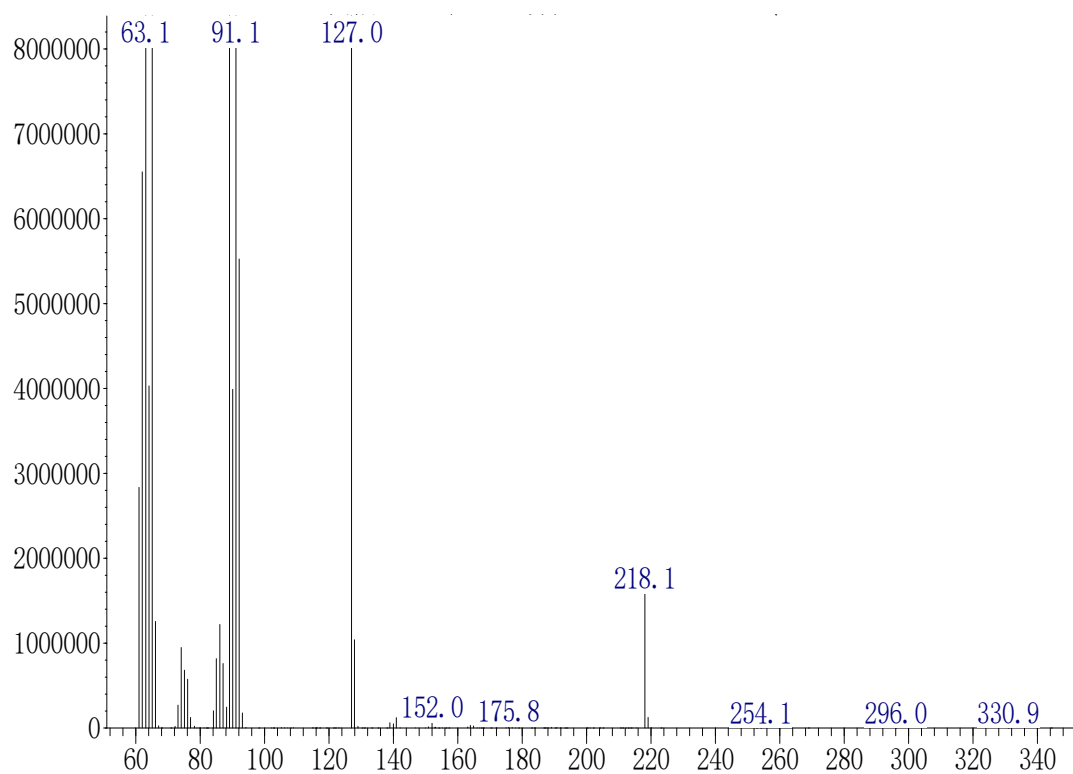

m/z -->

**Results and Discussion:** The reaction of dibenzyl ether **7a** with TMSI proceed

smoothly to produce benzyl iodine **8a-I** intermediate. Therefore, the initial formation of unwanted ethers from alcohols (Eq. 5) does not affect the reaction outcome at all.

## 2.5 The observation of possible intermediate **10a** (Eq. 10 in the text)

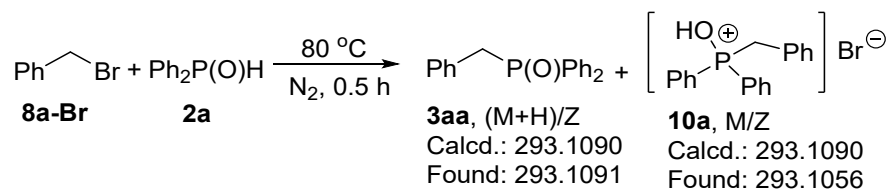

**Detailed Procedure:** The mixture of benzyl bromide **8a-Br** (71.3  $\mu\text{L}$ , 0.60 mmol), diphenylphosphine oxide **2a** (101.1 mg, 0.50 mmol) was directly sealed in a Schlenk tube (10 mL) under nitrogen, and then stirred at 80  $^\circ\text{C}$  for 0.5 h. After cooling, the reaction mixture was directly analyzed by HRMS, showing the signals of both 293.1091 and 293.1056.

## HRMS spectra

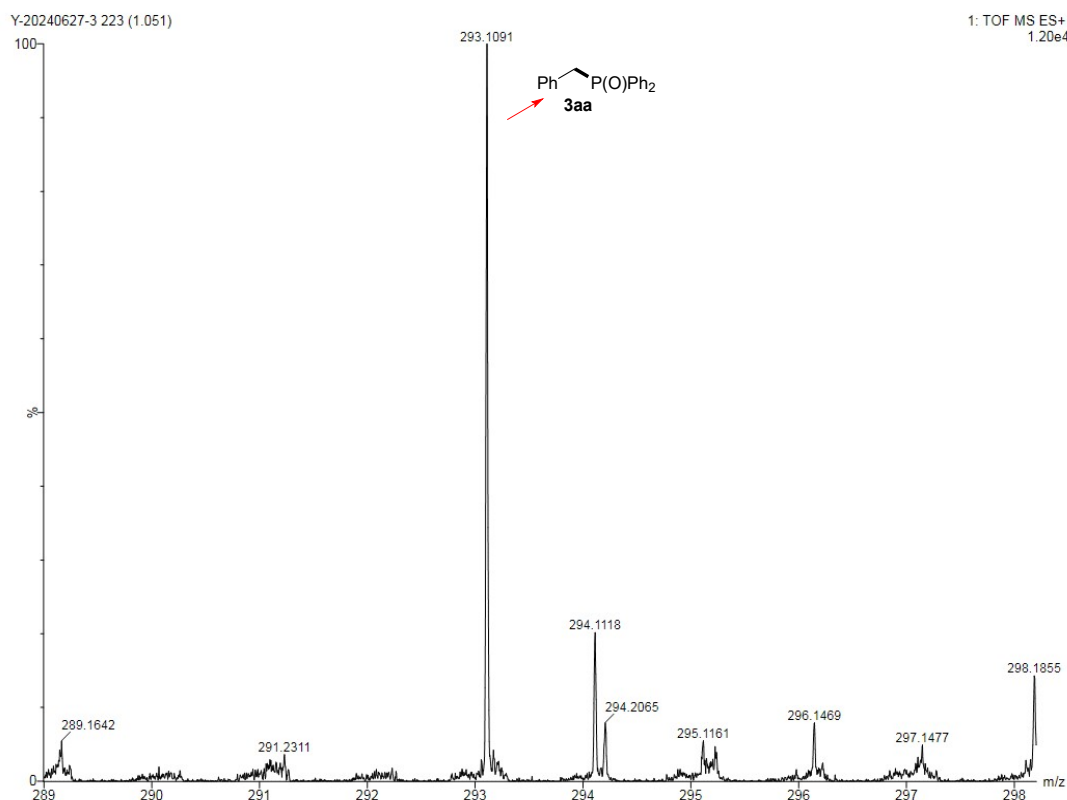

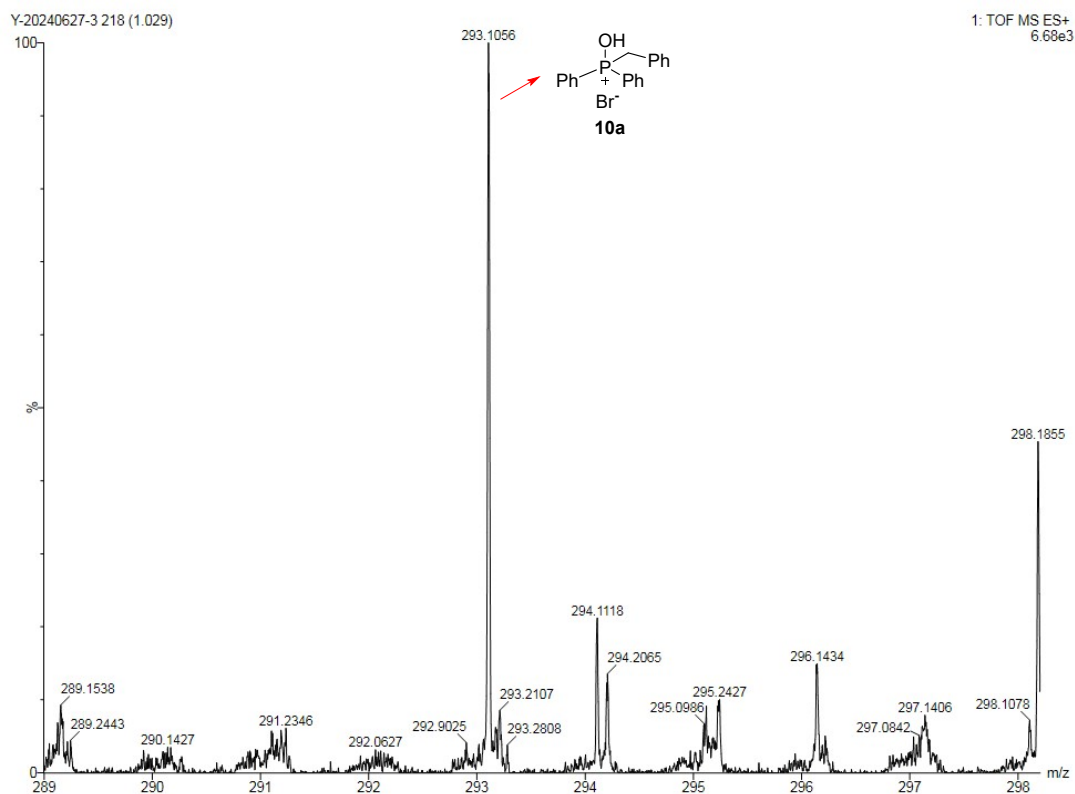

**Previous results:** The (M+H) peaks (293.1091) of **3aa** have been previously detected for some times during the condition screening (Table 1, runs 4-7 and 9-11 in the text, see below).

### HRMS spectrum of **3aa** (Table 1, run 4 in the text)

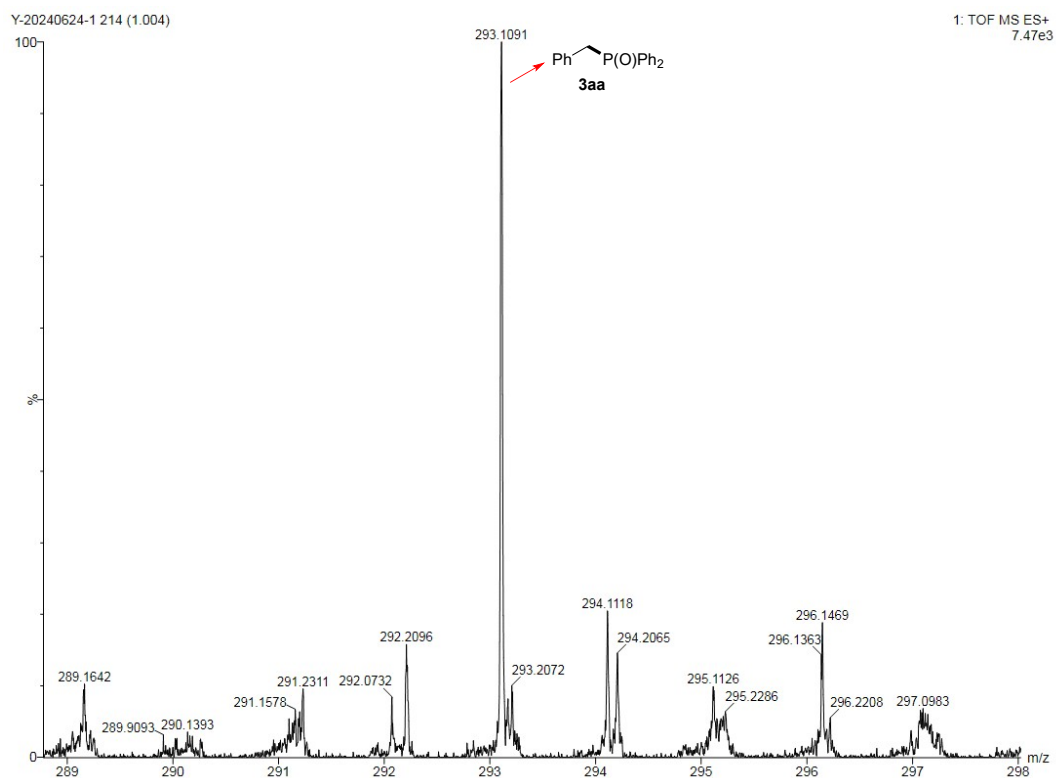

### HRMS spectrum of 3aa (Table 1, run 5 in the text)

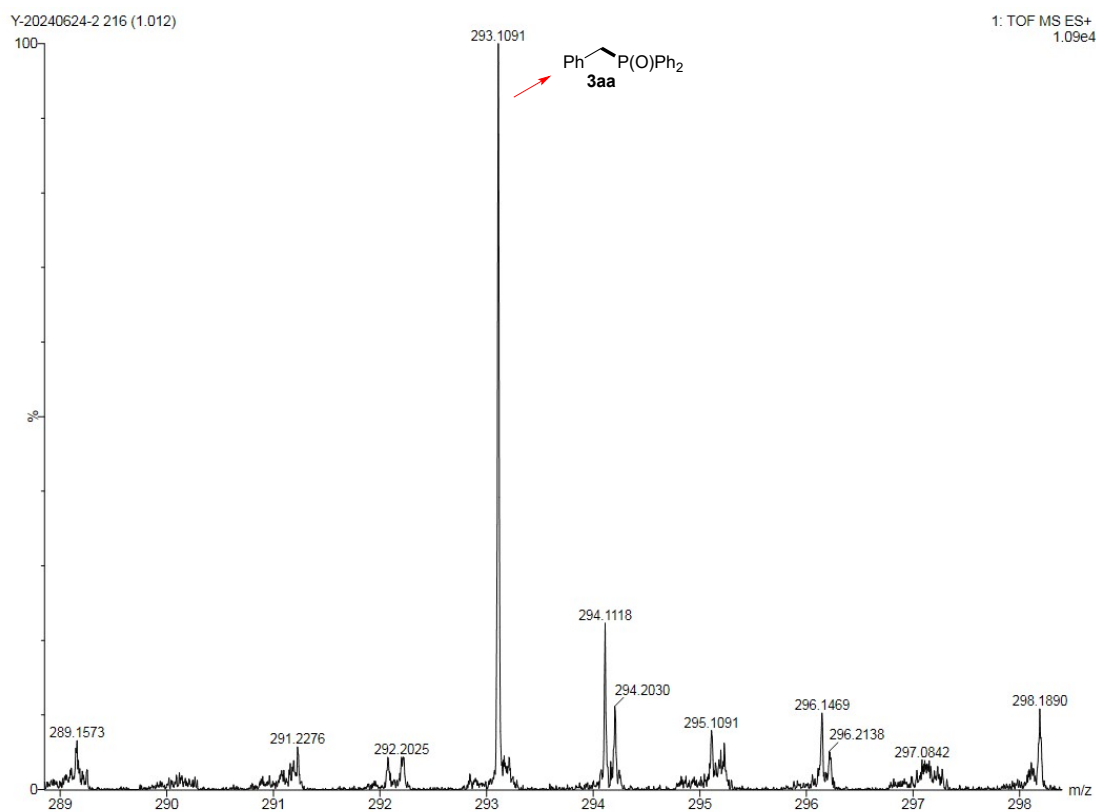

### HRMS spectrum of 3aa (Table 1, run 6 in the text)

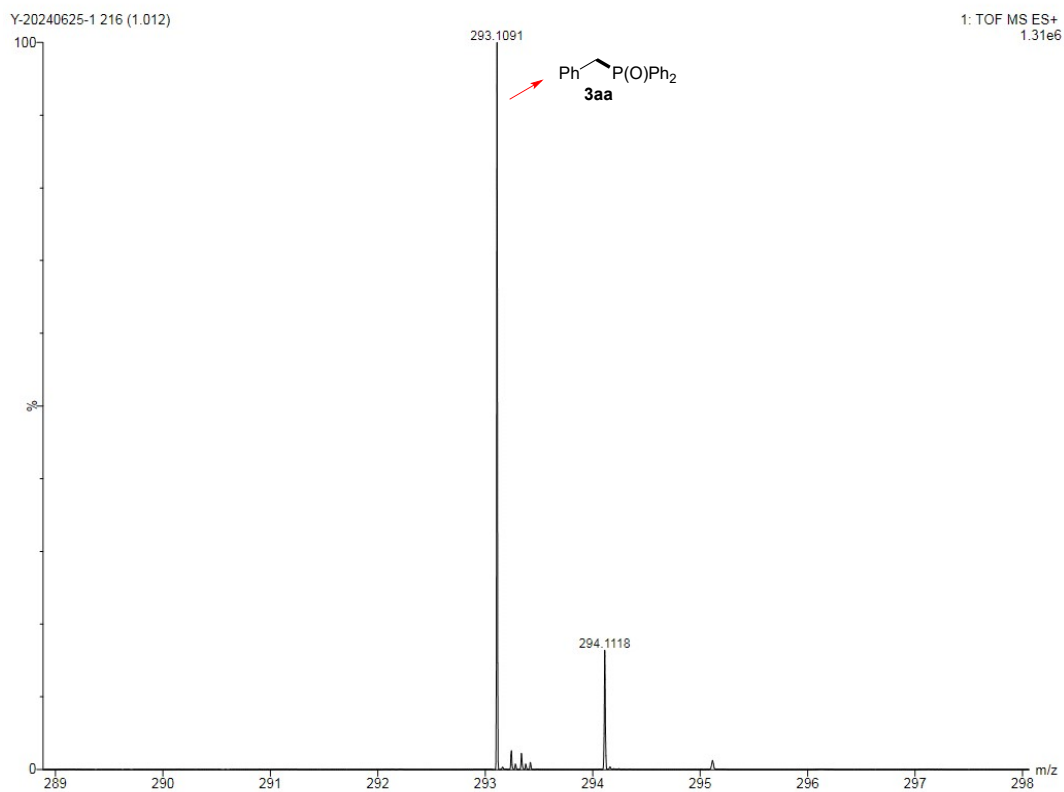

### HRMS spectrum of 3aa (Table 1, run 7 in the text)

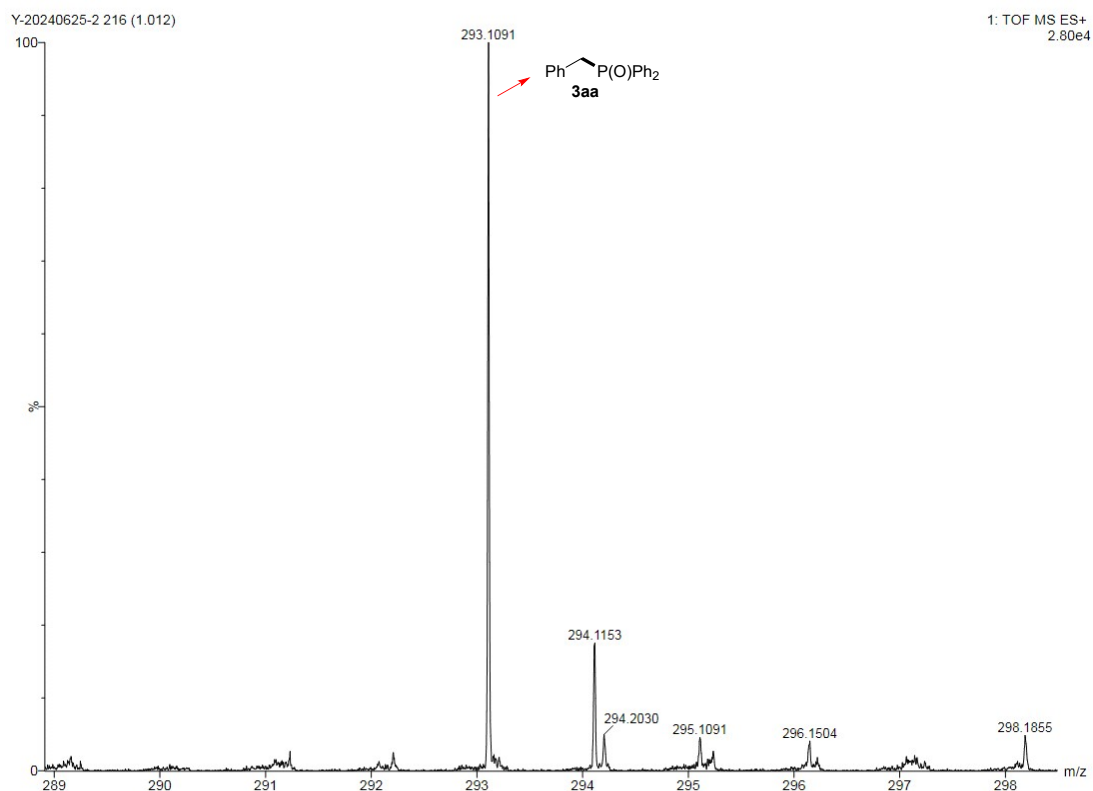

### HRMS spectrum of 3aa (Table 1, run 9 in the text)

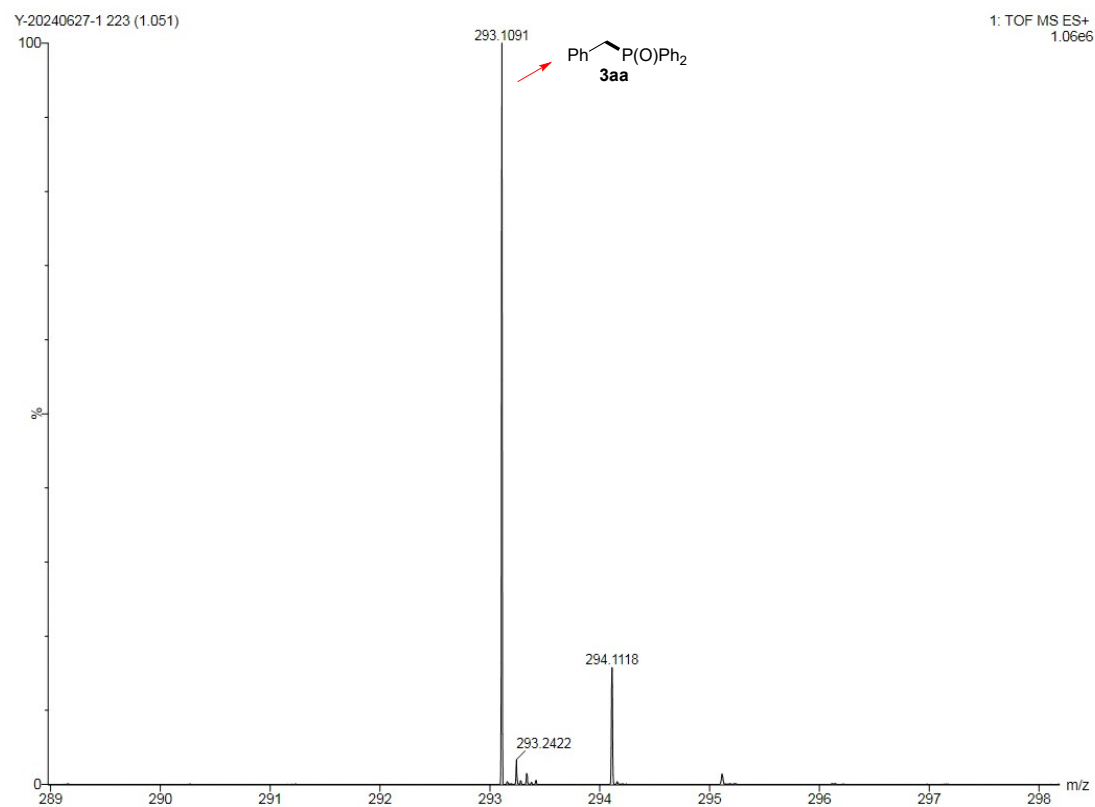



### HRMS spectrum of 3aa (Table 1, run 10 in the text)

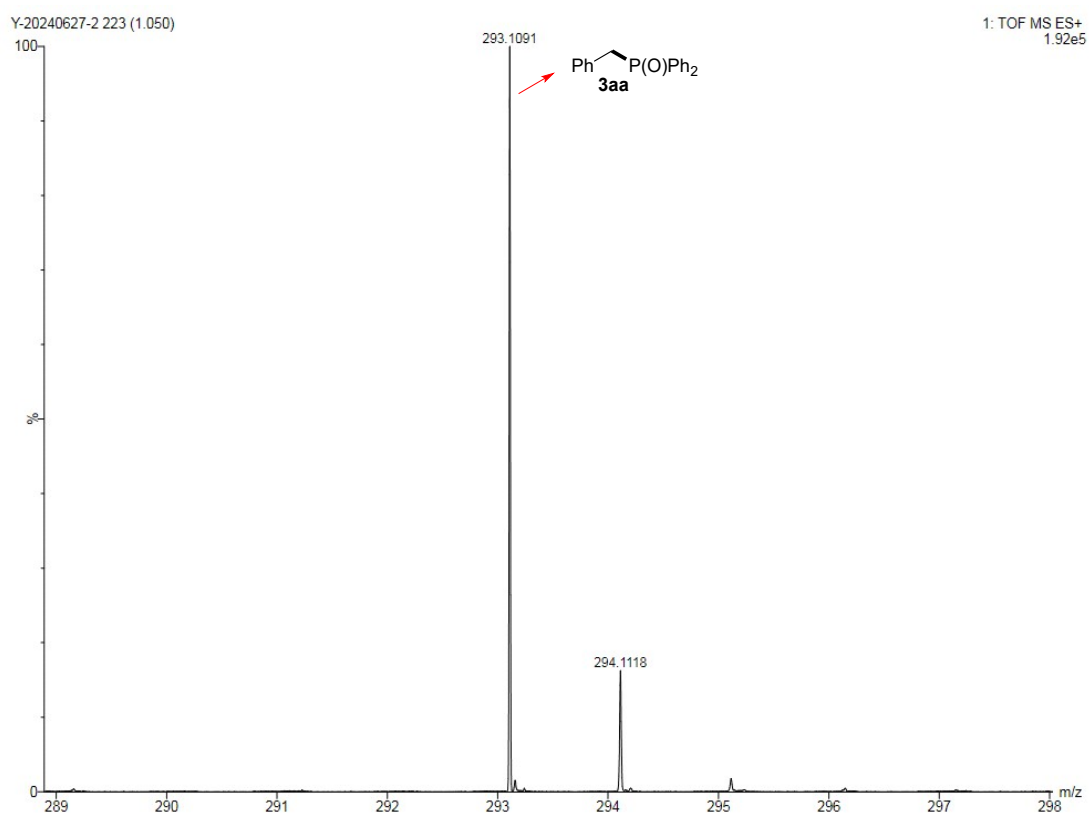

### HRMS spectrum of 3aa (Table 1, run 11 in the text)

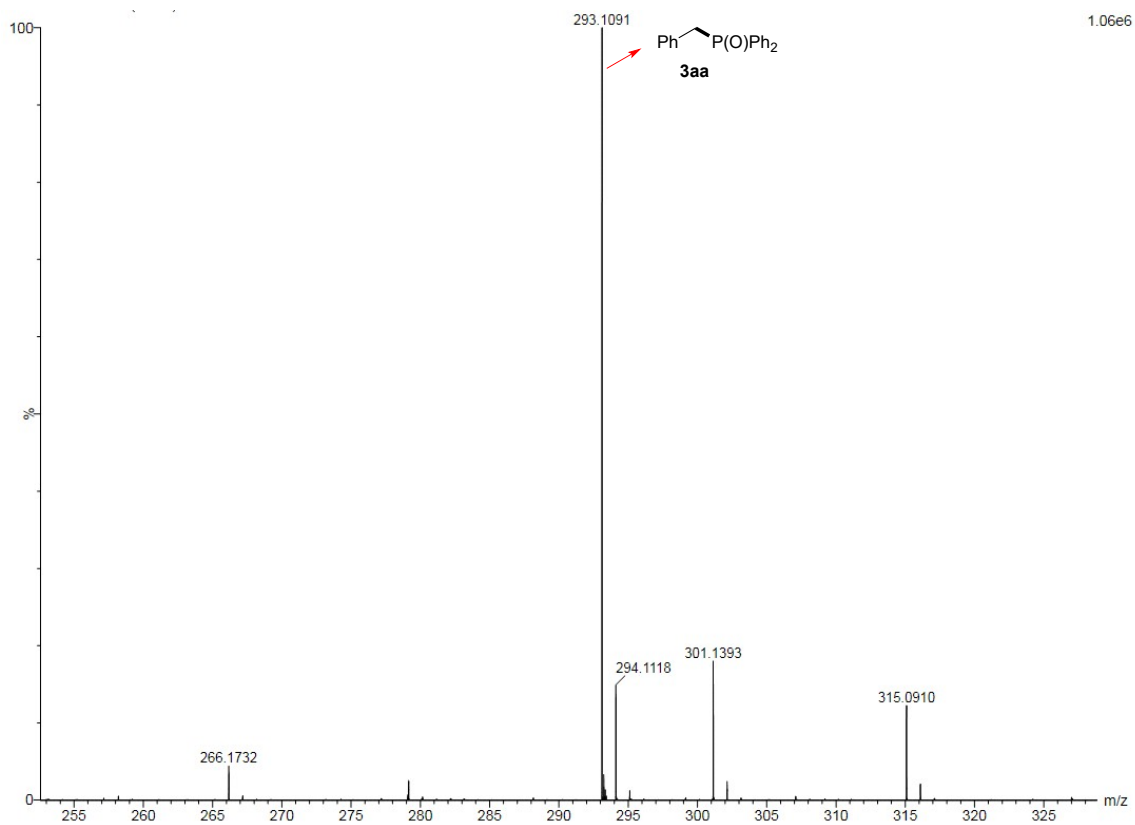

**Results and Discussion:** Both signals of 293.1091 and 293.1056 were detected by HRMS during the mixture. The peak of 293.1091 which has been previously detected for some times during the condition screening (as shown above) has been identified as the target product **3aa**. Therefore, it is hypothesized that 293.1056 may be the signal of the possible intermediate **10a**.

## 2.6 The reaction of benzyl alcohol and <sup>18</sup>O-diphenylphosphine oxide (<sup>18</sup>O-2a) (Eq. 11 in the text)

### 2.6.1 The synthesis of <sup>18</sup>O-diphenylphosphine oxide (<sup>18</sup>O-2a):

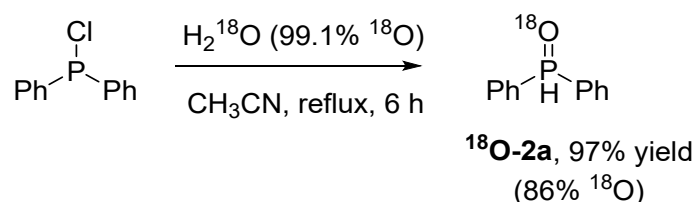

H<sub>2</sub><sup>18</sup>O (99.1 % <sup>18</sup>O) (1 mL) was added to a solution of chlorodiphenylphosphine (1.8 mL, 10 mmol) in anhydrous acetonitrile (10 mL) and the mixture was refluxed for 6h., The reaction mixture was then concentrated under reduced pressure. The residue was extracted with CH<sub>2</sub>Cl<sub>2</sub> (10 mLx3) and dried over MgSO<sub>4</sub>. The solvent was removed in vacuo to give <sup>18</sup>O-diphenylphosphine oxide as a colorless oil in 97% yield. <sup>18</sup>O-**2a** was determined to be containing 86 atom% <sup>18</sup>O by HRMS analysis. This method is known in the literature: Shioji, K.; Matsumoto, A.; Takao, M.; Kurauchi, Y.; Shigetomi, T.; Yokomori, Y.; Okuma, K. *B. Chem. Soc. Jpn.* **2007**, *80*, 4, 743-746.

# The Specification of H<sub>2</sub><sup>18</sup>O

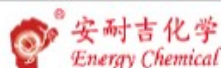

ISO9001/ISO14001/ISO45001认证企业

ZS/QA-4001-2024 (A4)

## 产品质量检测报告

报告日期: 2022-12-29

中文名 重氧水  
英文名 Heavy-oxygen water  
规格 98 atom % 18O  
CAS 编码 14314-42-2  
分子量 20.02  
分子式 18OH<sub>2</sub>  
产品编号 E090044  
批号 TODHRRDW  
检测日期 2022-12-26  
复检日期 2025-12-25  
储存条件 室温

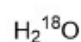

| 检查项  | 规格要求              | 实测结果             |
|------|-------------------|------------------|
| 外观   | 无色液体              | 无色透明液体           |
| 含量   | ≥ 98.0 atom % 18O | 99.10 atom % 18O |
| 0-17 | ≤ 1 atom %        | < 1 atom %       |
| 0-16 | ≤ 2 atom %        | < 2 atom %       |
| 结论   |                   |                  |

报告人: 胡汝锦

批准人: 梁欣荣

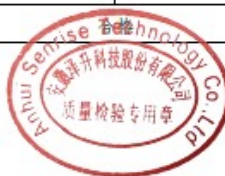

### 品控文件说明

产品质量规划书 (Specification): 本规格书注明产品的质量管理要求及合格产品的最低品质要求指标。

产品质量检测报告 (COA): 产品批次质量检测报告, 可在产品购买后提供批号及产品编号向我司索取; 也可以在我司官网 ([www.energy-chemical.com](http://www.energy-chemical.com)) 自行下载; 或扫描瓶身包装上的二维码获取电子版报告。

缔造中国试剂高端品牌、缔造中国品牌高端服务、缔造中国化学品高端科技

Tel: 400-005-6266

Fax: 0556-5555368

邮箱: [info@energy-chemical.com](mailto:info@energy-chemical.com) [www.energy-chemical.com](http://www.energy-chemical.com)

地址: 安徽省安庆市大观区高新技术开发区纬三路88号

## HRMS spectra of the product 2a

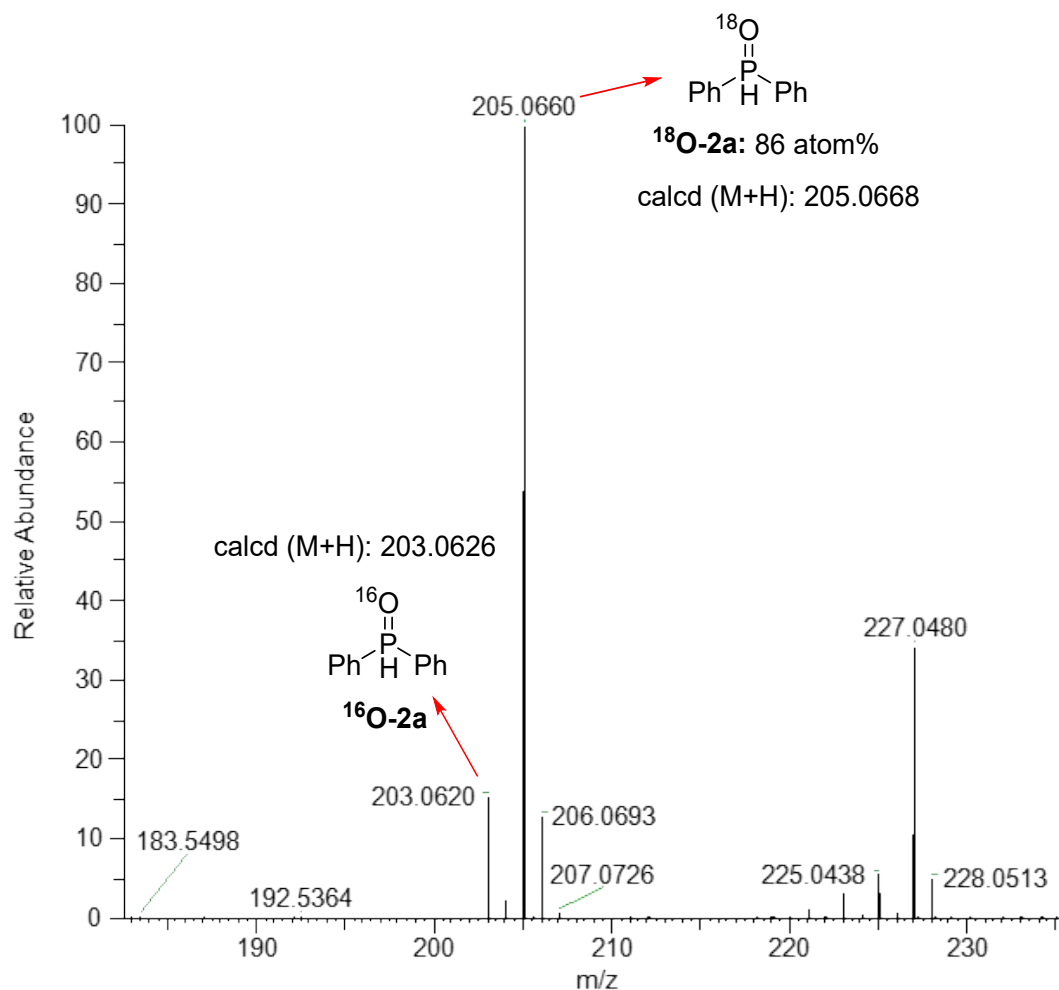

| Scan Number | m/z      | Relative |
|-------------|----------|----------|
| 114         | 205.0659 | 100.00   |
| 114         | 203.0620 | 16.49    |

$$^{18}\text{O}\text{-2a}: 100.00/(100.00+16.49) = 86\%$$

**2.4.2 Detailed Procedure for the reaction of benzyl alcohol and  $^{18}\text{O}$ -diphenylphosphine oxide ( $^{18}\text{O}$ -2a):** The mixture of benzyl alcohol **1a** (62.1  $\mu\text{L}$ , 0.60 mmol),  $^{18}\text{O}$ -diphenylphosphine oxide ( $^{18}\text{O}$ -2a) (102.0 mg, 0.5 mmol) and TMSI (7.1  $\mu\text{L}$ , 0.05 mmol) was directly sealed in a Schlenk tube (10 mL) under nitrogen, and then stirred at 80  $^{\circ}\text{C}$  for 12 h. After cooling, then the isotope analysis of the product  $^{18}\text{O}$ -3aa by HRMS showed that  $^{18}\text{O}$ -3aa should contain 72 atom%  $^{18}\text{O}$ .

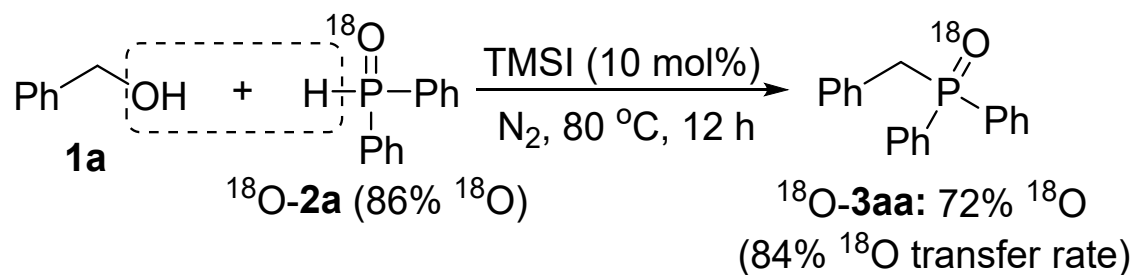

### HRMS spectra

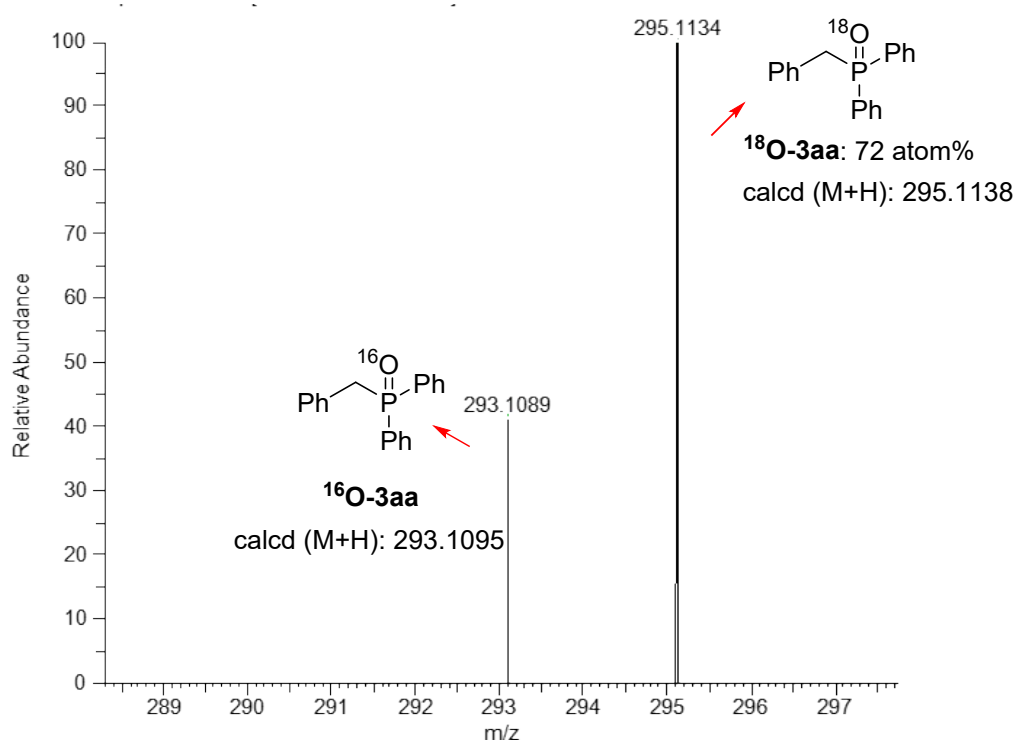

| Spectrum List 44 - 7 |          |          |
|----------------------|----------|----------|
| Scan Number          | m/z      | Relative |
| 44                   | 293.1089 | 38.90    |
| 44                   | 295.1134 | 100.00   |

$$^{18}\text{O-3aa}: 100.00 / (100.00 + 38.90) = 72\%$$

**Results and Discussion:** The reaction of **1a** and **<sup>18</sup>O-2a** (86 atom% <sup>18</sup>O) under standard conditions afforded the target **<sup>18</sup>O-3aa** (72 atom% <sup>18</sup>O), suggesting that the byproduct water is generated through the dehydroxylation of alcohols **1a** and dehydrogenation of secondary P(O)-H compounds **2a**. Therefore, these results suggested 1) the reaction majorly proceeded with retention of P-O bond, and 2) the alcohol's OH group majorly worked as the leaving group, which consists well with

the supposal that the reaction most possibly starts with a TMSI-promoted transformation of alcohols **1** to iodides **8** as the key intermediate, followed by C-P bond formation of **8** and **2**.

## 2.7 The reaction of <sup>18</sup>O-benzyl alcohol (<sup>18</sup>O-1a) and diphenylphosphine oxide (2a)

(Eq. 12 in text)

### 2.7.1 The Synthesis of <sup>18</sup>O-benzyl alcohol (<sup>18</sup>O-1a):

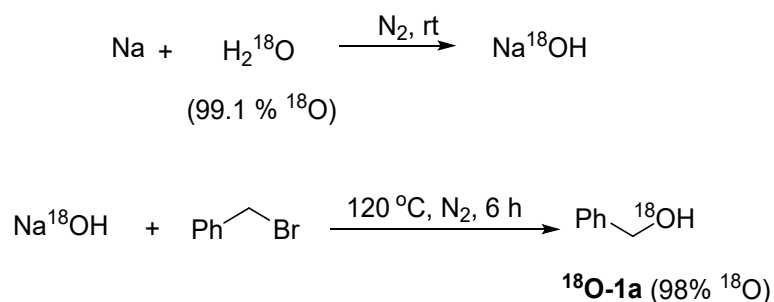

To a 25 mL Schlenk tube containing a magnetic stir bar was added H<sub>2</sub><sup>18</sup>O (99 atom%) (1mL) under nitrogen. Subsequently, sodium (0.368g, 1.2 mmol, 4 equiv) was introduced. Then benzyl bromide (0.48 mL, 4 mmol) was added and refluxed at 120 °C for 6 h. Finally, the mixture is extracted with ethyl acetate, concentrated under reduced pressure and then purified by silica gel column chromatography (eluent: petroleum ether/ethyl acetate (v/v) = 10:1) to afford <sup>18</sup>O-benzyl alcohol. Then the isotope analysis of the product <sup>18</sup>O-**1a** by HRGC showed that <sup>18</sup>O-**1a** should contain 98 atom% <sup>18</sup>O.

## HRGC spectra

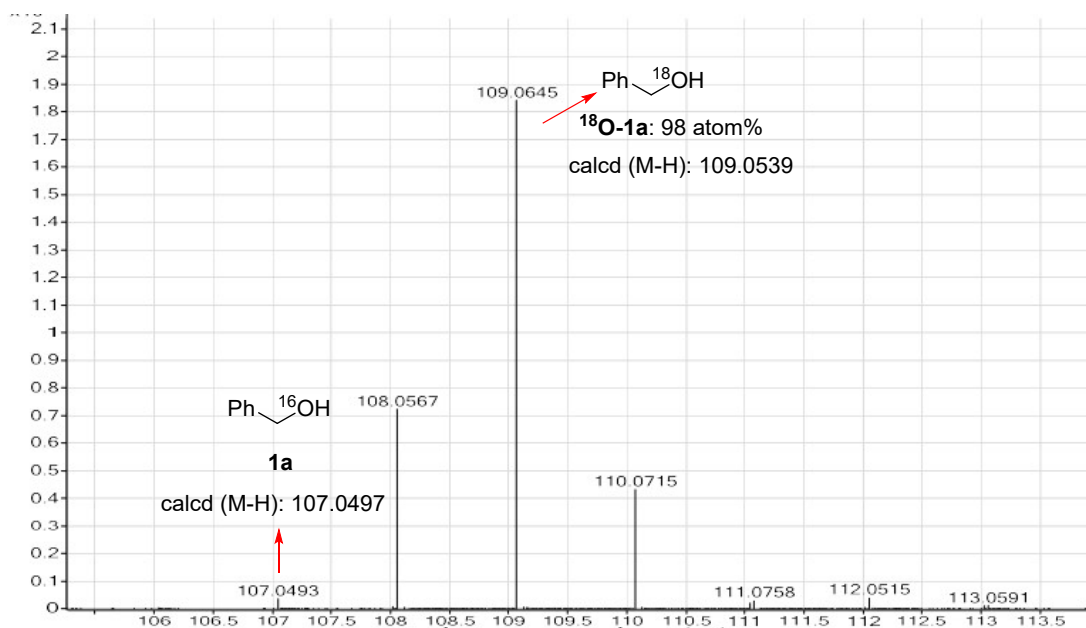

| 1 | m/z      | Abund      | Abund % (Norm) | Max Abund  |
|---|----------|------------|----------------|------------|
| 2 | 107.0493 | 34909.36   |                | 34909.36   |
| 3 | 108.0567 | 722203.5   |                | 722203.5   |
| 4 | 109.0645 | 1841064.25 |                | 1841064.25 |

$$^{18}\text{O-1a}: 1841064.25 / (34909.36 + 1841064.25) = 98\%$$

**2.7.2 Detailed Procedure for the reaction of  $^{18}\text{O}$ -benzyl alcohol ( $^{18}\text{O-1a}$ ) and diphenylphosphine oxide (**2a**):** The mixture of  $^{18}\text{O}$ -benzyl alcohol ( $^{18}\text{O-1a}$ ) (63.2  $\mu\text{L}$ , 0.60 mmol), diphenylphosphine oxide **2a** (101.0 mg, 0.5 mmol) and TMSI (7.1  $\mu\text{L}$ , 0.05 mmol) was directly sealed in a Schlenk tube (10 mL) under nitrogen, and then stirred at 80  $^{\circ}\text{C}$  for 12 h. After cooling, the reaction mixture was directly analyzed by HRMS, showing that  $^{18}\text{O-3aa}$  should contain 27 atom%  $^{18}\text{O}$ .

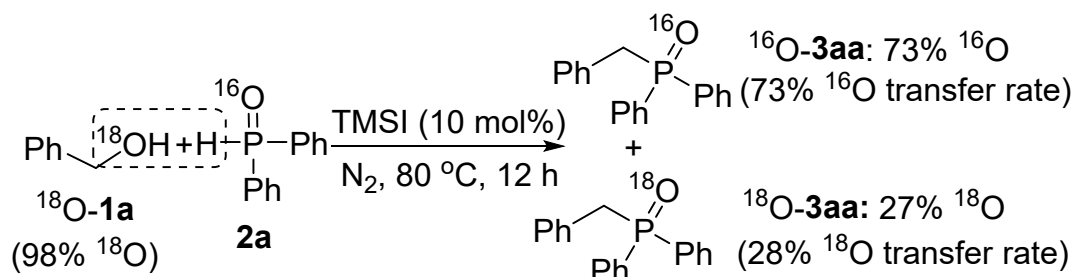

## HRMS spectra

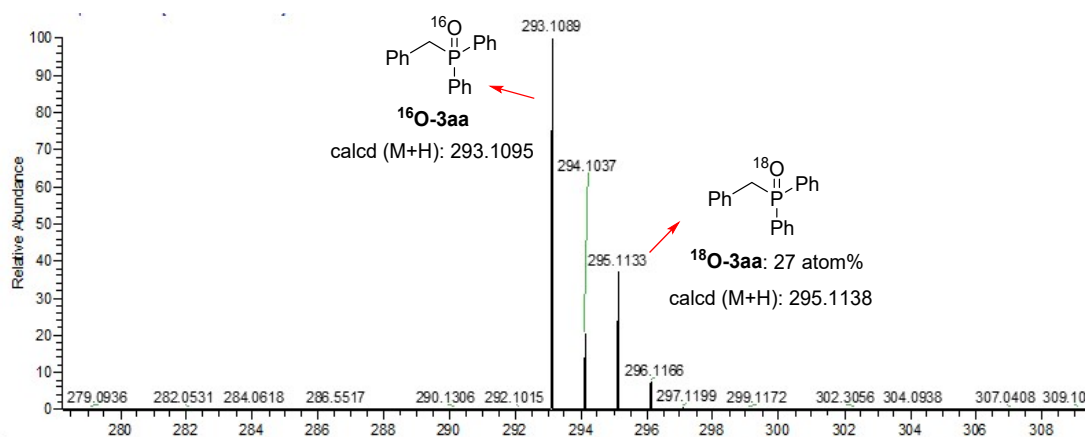

|   | m/z      | NL       |
|---|----------|----------|
| 1 | 293.1089 | 3.90E+08 |
| 2 | 295.1133 | 1.45E+08 |

$$^{18}\text{O}\text{-3aa}: 1.45 / (3.90 + 1.45) = 27\%$$

**Results and Discussion:** The reaction of  $^{18}\text{O}$ -**1a** (98 atom%  $^{18}\text{O}$ ) with **2a** under standard conditions gave the target  $^{18}\text{O}$ -**3aa** (27 atom%  $^{18}\text{O}$ ) in high yield, revealing that the byproduct water can partially generated through the dehydroxylation of secondary P(O)-H compounds **2a** and dehydrogenation of benzyl alcohols **1a**. Therefore, another reaction pathway may be involved in the reaction. However, as only 27 atom%  $^{18}\text{O}$ -**3aa** was obtained using 98 atom%  $^{18}\text{O}$ -**1a** (Eq. 12), which corresponds to only 28%  $^{18}\text{O}$  transfer rate, this process (Scheme 2, path a) should be a minor pathway in the reaction mechanism.



### 3. Typical Procedure and Characterization of the Products

**Typical procedure for the Catalytic Dehydrative Substitution of Primary Alcohols (CH<sub>2</sub>-OH) with P(O)-H Compounds:** The mixture of **1a** (62.1  $\mu$ L, 0.60 mmol), **2a** (101.1 mg, 0.50 mmol) and TMSI (7.1  $\mu$ L, 10 mol%) sealed under N<sub>2</sub> in a 10 mL Schlenk tube was heated at 80 °C for 12 h. Then the reaction mixture was analyzed by TLC/GC-MS and purified by washing the reaction mixture with a mixed solvent of ethyl acetate/petroleum ether (1:1) after the reaction under column chromatography-free conditions, giving **3aa** in 90% isolated yield. The product can also be directly purified by recrystallizing with a mixed solvent of MeOH/water (v/v 1/1) in 84% yield (> 99% purity).

**Typical Procedure for Gram Scale Reaction of 1a and 2a for the Synthesis of 3aa (Eq. 1, run 1 in the text):** The mixture of **1a** (1.3 g, 12 mmol), **2a** (2.0 g, 10 mmol) and TMSI (142.3  $\mu$ L, 1.0 mol, 10 mol%) was sealed under N<sub>2</sub> in a 25 mL Schlenk tube was heated at 100 °C for 24 h. Then the reaction mixture was analyzed by TLC/GC-MS and purified by washing the reaction mixture with a mixed solvent of ethyl acetate/petroleum ether (1:1) after the reaction under column chromatography-free conditions, giving **3aa** in 82% isolated yield.

**(Eq. 1, run 2 in the text):** The mixture of **1a** (1.3 g, 12 mmol), **2a** (2.0 g, 10 mmol) and TMSI (142.3  $\mu$ L, 1.0 mol, 10 mol%) and toluene (2.0 mL) was sealed under N<sub>2</sub> in a 25 mL Schlenk tube was heated at 100 °C for 24 h. Then the reaction mixture was analyzed by TLC/GC-MS. The solvent was evaporated by a rotary evaporator, and the residue was purified by washing the reaction mixture with a mixed solvent of ethyl acetate/petroleum ether (1:1) after the reaction under column chromatography-free conditions, giving **3aa** in 84% isolated yield.

*Note: Benefiting for the obvious experimental phenomenon that the reaction mixture changes from liquid at the beginning (Figure 1A) to solid at the end (Figure 1B), the column chromatography-free isolation and purification of the target products was achieved (Figure 1C), making the method much greener and practical.*

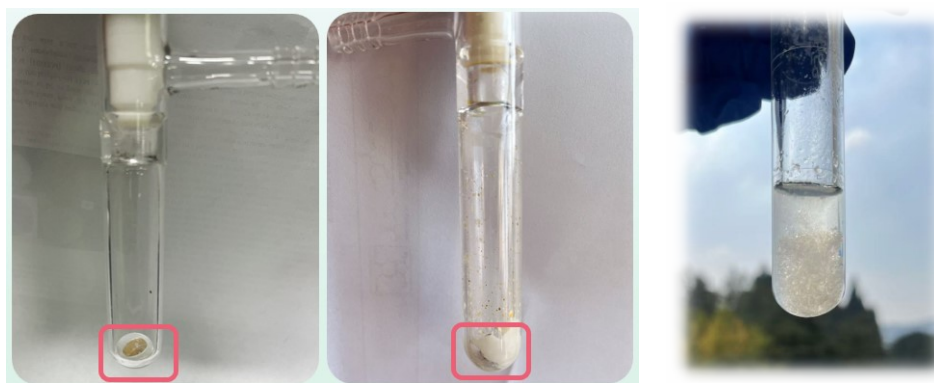

A) At the beginning of the reaction B) After the reaction C) Recrystallization

Figure 1 . The obvious experimental phenomenon

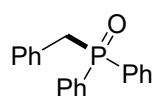

**Benzylidiphenylphosphine Oxide(3aa)**, white solid.  $^1\text{H}$  NMR (600 MHz,  $\text{CDCl}_3$ )  $\delta$  7.72 – 7.66 (m, 4H), 7.51 – 7.47 (m, 2H), 7.44 – 7.37 (m, 4H), 7.18 – 7.16 (m, 3H), 7.10 (dd,  $J = 5.4, 1.8$  Hz, 2H), 3.64 (d,  $J = 13.8$  Hz, 2H).  $^{13}\text{C}$  NMR (151 MHz,  $\text{CDCl}_3$ )  $\delta$  132.3 (d,  $J = 98.9$  Hz), 131.91, 131.3 (d,  $J = 8.8$  Hz), 130.2 (d,  $J = 4.8$  Hz), 128.6, 128.6, 128.5, 126.9, 38.2 (d,  $J = 66.6$  Hz).  $^{31}\text{P}$  NMR (243 MHz,  $\text{CDCl}_3$ )  $\delta$  30.18. This compound is known in the literature: X. T. Ma, Q. Xu, H. Li, C. L. Su, L. Yu, X. Zhang, H. Cao, L. B. Han, *Green Chem.*, **2018**, *20*, 3408–3413.

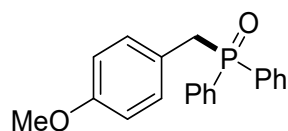

**(4-Methoxybenzyl)Diphenylphosphine Oxide(3ab)**, white solid.  $^1\text{H}$  NMR (600 MHz,  $\text{CDCl}_3$ )  $\delta$  7.72 – 7.64 (m, 4H), 7.54 – 7.47 (m, 2H), 7.47 – 7.40 (m, 4H), 7.02 (dd,  $J = 8.4, 2.4$  Hz, 2H), 6.79 – 6.68 (m, 2H), 3.74 (s, 3H), 3.60 (d,  $J = 13.2$  Hz, 2H).  $^{13}\text{C}$  NMR (151 MHz,  $\text{CDCl}_3$ )  $\delta$  158.6, 132.4 (d,  $J = 98.5$  Hz), 131.9, 131.3, 131.23, 131.19, 122.9 (d,  $J = 7.8$  Hz), 114.0, 55.3, 37.2 (d,  $J = 67.2$  Hz).  $^{31}\text{P}$  NMR (243 MHz,  $\text{CDCl}_3$ )  $\delta$  30.23. This compound is known in the literature: X. T. Ma, Q. Xu, H. Li, C. L. Su, L. Yu, X. Zhang, H. Cao, L. B. Han, *Green Chem.*, **2018**, *20*, 3408–3413.

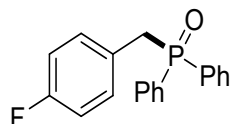

**(4-Fluorobenzyl)Diphenylphosphine Oxide(3ac)**, white solid.  $^1\text{H}$  NMR (600 MHz,  $\text{CDCl}_3$ )  $\delta$  7.73 – 7.64 (m, 4H), 7.52 (t,  $J = 7.2$  Hz, 2H), 7.47 – 7.39 (m, 4H), 7.12 – 7.03 (m, 2H), 6.87 (t,  $J = 8.4$  Hz, 2H), 3.62 (d,  $J = 13.2$  Hz, 2H).  $^{13}\text{C}$  NMR (151 MHz,  $\text{CDCl}_3$ )  $\delta$  162.0 (d,  $J = 248.0$  Hz), 132.1 (d,  $J = 99.2$  Hz), 132.0 (d,  $J = 1.8$  Hz), 131.7 (dd,  $J = 7.5, 5.4$  Hz), 131.2 (d,  $J = 8.9$  Hz), 128.7 (d,  $J = 11.6$  Hz), 126.89 (dd,  $J = 7.8, 2.8$  Hz), 115.4 (d,  $J = 21.7$  Hz), 37.3 (d,  $J = 66.8$  Hz).  $^{31}\text{P}$  NMR (243 MHz,  $\text{CDCl}_3$ )  $\delta$  29.98. This compound is known in the literature: F. J. Wang, M. L. Qu, F. Chen, Q. Xu, M. Shi, *Chem. Commun.*, **2012**, 48, 8580-8582.

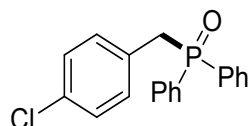

**(4-Chlorobenzyl)Diphenylphosphine Oxide(3ad)**, white solid.  $^1\text{H}$  NMR (600 MHz,  $\text{CDCl}_3$ )  $\delta$  7.75 – 7.64 (m, 4H), 7.56 – 7.50 (m, 2H), 7.48 – 7.42 (m, 4H), 7.16 (d,  $J = 8.4$  Hz, 2H), 7.04 (dd,  $J = 8.4, 2.4$  Hz, 2H), 3.61 (d,  $J = 13.2$  Hz, 2H).  $^{13}\text{C}$  NMR (151 MHz,  $\text{CDCl}_3$ )  $\delta$  132.9 (d,  $J = 2.9$  Hz), 132.1 (d,  $J = 2.1$  Hz), 132.0 (d,  $J = 99.7$  Hz), 131.5 (d,  $J = 4.7$  Hz), 131.2 (d,  $J = 8.9$  Hz), 129.8 (d,  $J = 8.2$  Hz), 128.7 (d,  $J = 11.7$  Hz), 128.6 (d,  $J = 2.4$  Hz), 37.5 (d,  $J = 66.2$  Hz).  $^{31}\text{P}$  NMR (243 MHz,  $\text{CDCl}_3$ )  $\delta$  29.82. This compound is known in the literature: X. T. Ma, Q. Xu, H. Li, C. L. Su, L. Yu, X. Zhang, H. Cao, L. B. Han, *Green Chem.*, **2018**, 20, 3408–3413.

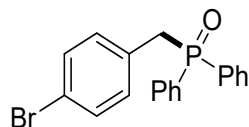

**(4-Bromobenzyl)Diphenylphosphine Oxide(3ae)**, white solid.  $^1\text{H}$  NMR (600 MHz,  $\text{CDCl}_3$ )  $\delta$  7.68 (ddd,  $J = 11.2, 5.4, 3.2$  Hz, 4H), 7.57 – 7.50 (m, 2H), 7.49 – 7.41 (m, 4H), 7.31 (d,  $J = 8.4$  Hz, 2H), 6.98 (dd,  $J = 8.4, 2.4$  Hz, 2H), 3.60 (d,  $J = 13.2$  Hz, 2H).  $^{13}\text{C}$  NMR (151 MHz,  $\text{CDCl}_3$ )  $\delta$  132.1, 132.0 (d,  $J = 99.5$  Hz), 131.8 (d,  $J = 4.6$  Hz), 131.6, 131.2 (d,  $J = 8.9$  Hz), 130.3 (d,  $J = 8.2$  Hz), 128.7 (d,  $J = 11.7$  Hz), 121.1, 37.6 (d,  $J = 66.2$  Hz).  $^{31}\text{P}$  NMR (243 MHz,  $\text{CDCl}_3$ )  $\delta$  29.68. This compound is known in

the literature: F. J. Wang, M. L. Qu, F. Chen, Q. Xu, M. Shi, *Chem. Commun.*, **2012**, 48, 8580-8582.

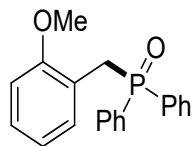

**(2-Methylbenzyl)Diphenylphosphine Oxide(3af)**, white solid.  $^1\text{H}$  NMR (600 MHz,  $\text{CDCl}_3$ )  $\delta$  7.75 – 7.65 (m, 4H), 7.51 – 7.44 (m, 2H), 7.44 – 7.37 (m, 4H), 7.37 – 7.32 (m, 1H), 7.19 – 7.10 (m, 1H), 6.86 (t,  $J = 7.2$  Hz, 1H), 6.64 (d,  $J = 8.4$  Hz, 1H), 3.76 (d,  $J = 14.4$  Hz, 2H), 3.42 (s, 3H).  $^{13}\text{C}$  NMR (151 MHz,  $\text{CDCl}_3$ )  $\delta$  156.9 (d,  $J = 5.4$  Hz), 132.6 (d,  $J = 98.9$  Hz), 131.8 (d,  $J = 4.5$  Hz), 131.7 (d,  $J = 1.8$  Hz), 131.3 (d,  $J = 9.0$  Hz), 128.293 (d,  $J = 3.0$  Hz), 128.290 (d,  $J = 11.6$  Hz), 120.6 (d,  $J = 2.2$  Hz), 119.7 (d,  $J = 8.2$  Hz), 110.2, 54.9, 31.1 (d,  $J = 67.9$  Hz).  $^{31}\text{P}$  NMR (243 MHz,  $\text{CDCl}_3$ )  $\delta$  31.58. This compound is known in the literature: P.-Y. Renard, P. Vayron, C. Mioskowski, *Org. Lett.*, **2003**, 5, 1661 - 1664.

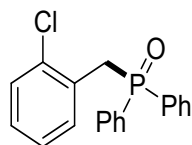

**(2-Chlorobenzyl)Diphenylphosphine Oxide(3ag)**, white solid.  $^1\text{H}$  NMR (600 MHz,  $\text{CDCl}_3$ )  $\delta$  7.91 – 7.74 (m, 4H), 7.63 (d,  $J = 7.8$  Hz, 1H), 7.61 – 7.56 (m, 2H), 7.54 – 7.50 (m, 4H), 7.31 (d,  $J = 7.8$  Hz, 1H), 7.24 (dd,  $J = 14.4, 7.2$  Hz, 1H), 7.19 (dd,  $J = 10.2, 4.8$  Hz, 1H), 3.96 (d,  $J = 13.8$  Hz, 2H).  $^{13}\text{C}$  NMR (151 MHz,  $\text{CDCl}_3$ )  $\delta$  134.4 (d,  $J = 6.7$  Hz), 132.2 (d,  $J = 99.8$  Hz), 132.1, 132.0, 131.2 (d,  $J = 9.1$  Hz), 129.8 (d,  $J = 7.2$  Hz), 129.5, 128.6 (d,  $J = 11.7$  Hz), 128.4, 126.9, 34.7 (d,  $J = 66.6$  Hz).  $^{31}\text{P}$  NMR (243 MHz,  $\text{CDCl}_3$ )  $\delta$  30.11. This compound is known in the literature: L. Liu, Y. Y. Tang, K. Y. Wang, T. Z. Huang, T. Q. Chen, *J. Org. Chem.*, **2021**, 86, 4159–4170.

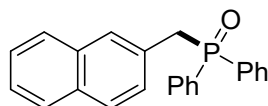

**(Naphthalen-2-ylmethyl)Diphenylphosphine Oxide(3ah)**, white solid.  $^1\text{H}$  NMR (600 MHz,  $\text{CDCl}_3$ )  $\delta$  7.78 – 7.69 (m, 5H), 7.68 – 7.65 (m, 2H), 7.57 (s, 1H), 7.53 – 7.48 (m, 2H), 7.46 – 7.39 (m, 6H), 7.23 (d,  $J = 8.4$  Hz, 1H), 3.82 (d,  $J = 13.8$  Hz, 2H).

$^{13}\text{C}$  NMR (151 MHz,  $\text{CDCl}_3$ )  $\delta$  133.4 (d,  $J = 2.0$  Hz), 132.7, 132.2 (d,  $J = 41.8$  Hz), 131.97, 131.94, 131.3 (d,  $J = 9.1$  Hz), 129.1 (d,  $J = 6.9$  Hz), 128.8 (d,  $J = 8.3$  Hz), 128.6 (d,  $J = 11.7$  Hz), 128.3 (d,  $J = 3.9$  Hz), 128.0, 127.7 (d,  $J = 12.2$  Hz), 126.1, 125.8, 38.44 (d,  $J = 66.4$  Hz).  $^{31}\text{P}$  NMR (243 MHz,  $\text{CDCl}_3$ )  $\delta$  30.07. This compound is known in the literature: X. T. Ma, Q. Xu, H. Li, C. L. Su, L. Yu, X. Zhang, H. Cao, L. B. Han, *Green Chem.*, **2018**, *20*, 3408–3413.

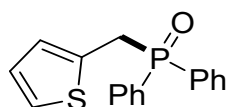

**Diphenyl(Thiophen-2-ylmethyl)phosphine Oxide(3ai)**, white solid.  $^1\text{H}$  NMR (600 MHz,  $\text{CDCl}_3$ )  $\delta$  7.76 – 7.71 (m, 4H), 7.53 – 7.51 (m, 2H), 7.46 – 7.42 (m, 4H), 7.08 (dd,  $J = 6.6, 1.2$  Hz, 1H), 6.85 (dt,  $J = 5.4, 3.2$  Hz, 2H), 3.88 (d,  $J = 13.2$  Hz, 2H).  $^{13}\text{C}$  NMR (151 MHz,  $\text{CDCl}_3$ )  $\delta$  132.1, 132.0 (d,  $J = 8.6$  Hz), 131.8 (d,  $J = 99.7$  Hz), 131.3 (d,  $J = 9.4$  Hz), 128.7 (d,  $J = 11.6$  Hz), 127.9 (d,  $J = 6.4$  Hz), 127.1 (d,  $J = 2.0$  Hz), 125.0 (d,  $J = 1.9$  Hz), 32.7 (d,  $J = 68.7$  Hz).  $^{31}\text{P}$  NMR (243 MHz,  $\text{CDCl}_3$ )  $\delta$  29.14. This compound is known in the literature: X. T. Ma, Q. Xu, H. Li, C. L. Su, L. Yu, X. Zhang, H. Cao, L. B. Han, *Green Chem.*, **2018**, *20*, 3408–3413.

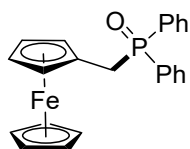

**(Ferrocenylmethyl)diphenylphosphine Oxide(3aj)**, white solid.  $^1\text{H}$  NMR (600 MHz,  $\text{CDCl}_3$ )  $\delta$  7.71 – 7.63 (m, 4H), 7.51 (t,  $J = 7.2$  Hz, 2H), 7.44 (t,  $J = 5.4$  Hz, 4H), 4.05 (d,  $J = 44.4$  Hz, 10H), 3.43 (d,  $J = 12.6$  Hz, 2H).  $^{13}\text{C}$  NMR (151 MHz,  $\text{CDCl}_3$ )  $\delta$  132.4 (d,  $J = 98.0$  Hz), 131.8, 131.3 (d,  $J = 8.7$  Hz), 128.5 (d,  $J = 11.4$  Hz), 69.9, 69.0, 68.1, 33.4 (d,  $J = 67.2$  Hz).  $^{31}\text{P}$  NMR (243 MHz,  $\text{CDCl}_3$ )  $\delta$  28.96. This compound is known in the literature: F. J. Wang, M. L. Qu, F. Chen, Q. Xu, M. Shi, *Chem. Commun.*, **2012**, *48*, 8580-8582. Unknown NMR (151 MHz, )  $\delta$ .

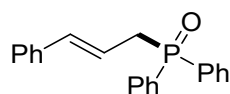

**Cinnamyl diphenylphosphine Oxide(3ak)**, white solid.  $^1\text{H}$  NMR (600 MHz,  $\text{CDCl}_3$ )

$\delta$  7.82 – 7.70 (m, 4H), 7.57 – 7.52 (m, 2H), 7.50 – 7.43 (m, 4H), 7.30 – 7.22 (m, 4H), 7.22 – 7.17 (m, 1H), 6.42 (dd,  $J = 15.6, 4.2$  Hz, 1H), 6.18 (ddd,  $J = 15.2, 13.8, 7.8$  Hz, 1H), 3.30 (ddd,  $J = 14.4, 7.8, 1.2$  Hz, 2H).  $^{13}\text{C}$  NMR (151 MHz,  $\text{CDCl}_3$ )  $\delta$  136.8, 135.7 (d,  $J = 12.1$  Hz), 132.5 (d,  $J = 98.8$  Hz), 132.0 (d,  $J = 2.1$  Hz), 131.2 (d,  $J = 9.1$  Hz), 128.7 (d,  $J = 11.7$  Hz), 128.6, 127.7, 126.3, 118.5 (d,  $J = 9.4$  Hz), 35.7 (d,  $J = 68.9$  Hz).  $^{31}\text{P}$  NMR (243 MHz,  $\text{CDCl}_3$ )  $\delta$  30.67. This compound is known in the literature: X. T. Ma, Q. Xu, H. Li, C. L. Su, L. Yu, X. Zhang, H. Cao, L. B. Han, *Green Chem.*, **2018**, *20*, 3408–3413.

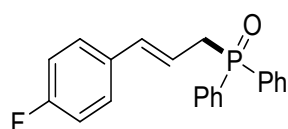

**(E)-(3-(4-Fluorophenyl)Allyl)Diphenylphosphine Oxide(3al)**, white solid.  $^1\text{H}$  NMR (600 MHz,  $\text{CDCl}_3$ )  $\delta$  7.80 – 7.71 (m, 4H), 7.57 – 7.52 (m, 2H), 7.50 – 7.46 (m, 4H), 7.20 (dd,  $J = 8.4, 5.4$  Hz, 2H), 6.94 (t,  $J = 8.4$  Hz, 2H), 6.39 (dd,  $J = 15.6, 4.2$  Hz, 1H), 6.16 – 6.02 (m, 1H), 3.28 (dd,  $J = 14.4, 7.8$  Hz, 2H).  $^{13}\text{C}$  NMR (151 MHz,  $\text{CDCl}_3$ )  $\delta$  162.3 (d,  $J = 246.9$  Hz), 134.5 (d,  $J = 12.0$  Hz), 132.9 (d,  $J = 35.1$  Hz), 132.1 (d,  $J = 10.7$  Hz), 131.1 (d,  $J = 9.4$  Hz), 128.8 (d,  $J = 11.8$  Hz), 127.8 (d,  $J = 7.8$  Hz), 118.2 (d,  $J = 10.1$  Hz), 115.5 (d,  $J = 21.6$  Hz), 35.5 (d,  $J = 68.8$  Hz).  $^{31}\text{P}$  NMR (243 MHz,  $\text{CDCl}_3$ )  $\delta$  30.68. HRMS (ESI) for  $\text{C}_{21}\text{H}_{19}\text{FOP}$  ( $\text{M}+\text{H}$ ): Calcd: 337.1158; found: 337.1154.

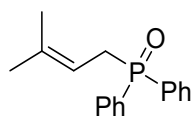

**(3-Methylbut-2-en-1-yl)Diphenylphosphine Oxide(3am)**, white solid.  $^1\text{H}$  NMR (600 MHz,  $\text{CDCl}_3$ )  $\delta$  7.78 – 7.70 (m, 4H), 7.52 (t,  $J = 7.2$  Hz, 2H), 7.49 – 7.43 (m, 4H), 5.31 – 5.10 (m, 1H), 3.08 (dd,  $J = 14.4, 7.8$  Hz, 2H), 1.66 (d,  $J = 4.2$  Hz, 3H), 1.44 (d,  $J = 2.4$  Hz, 3H).  $^{13}\text{C}$  NMR (151 MHz,  $\text{CDCl}_3$ )  $\delta$  137.7 (d,  $J = 12.2$  Hz), 132.9 (d,  $J = 97.9$  Hz), 131.8, 131.1 (d,  $J = 9.0$  Hz), 128.6 (d,  $J = 11.5$  Hz), 112.3 (d,  $J = 8.6$  Hz), 30.9 (d,  $J = 70.6$  Hz), 25.9, 18.1.  $^{31}\text{P}$  NMR (243 MHz,  $\text{CDCl}_3$ )  $\delta$  31.64. This compound is known in the literature: C. Tejo, J. H. Pang, D. Y. Ong, M. Oi, M. Uchiyama, R. Takita, S. Chiba, *Chem. Commun.*, **2018**, *54*, 1782 - 1785.

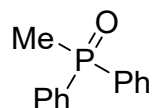

**Methylphenyldiphenylphosphine Oxide(3ao)**, white solid.  $^1\text{H}$  NMR (600 MHz,  $\text{CDCl}_3$ )  $\delta$  7.77 – 7.69 (m, 4H), 7.55 – 7.44 (m, 6H), 2.03 (d,  $J = 13.2$  Hz, 3H).  $^{13}\text{C}$  NMR (151 MHz,  $\text{CDCl}_3$ )  $\delta$  134.1 (d,  $J = 101.3$  Hz), 131.9 (d,  $J = 2.2$  Hz), 130.6 (d,  $J = 9.8$  Hz), 128.7 (d,  $J = 11.8$  Hz), 16.7 (d,  $J = 73.7$  Hz).  $^{31}\text{P}$  NMR (243 MHz,  $\text{CDCl}_3$ )  $\delta$  30.6. This compound is known in the literature: C.-K. Li, Z.-K. Tao, A. Shoberu, W. Zhang, J.-P. Zou, *Org. Lett.*, **2022**, *24*, 6083 – 6087.

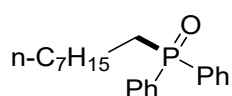

**Octyldiphenylphosphine Oxide(3ap)**, white solid.  $^1\text{H}$  NMR (600 MHz,  $\text{CDCl}_3$ )  $\delta$  7.79 – 7.70 (m, 4H), 7.54 – 7.44 (m, 6H), 2.31 – 2.20 (m, 2H), 1.62 (tt,  $J = 16.2, 8.4$  Hz, 2H), 1.42 – 1.35 (m, 2H), 1.32 – 1.17 (m, 8H), 0.85 (t,  $J = 7.2$  Hz, 3H).  $^{13}\text{C}$  NMR (151 MHz,  $\text{CDCl}_3$ )  $\delta$  133.2 (d,  $J = 97.8$  Hz), 131.7, 130.9 (d,  $J = 9.3$  Hz), 128.7 (d,  $J = 11.5$  Hz), 31.9, 31.1 (d,  $J = 14.6$  Hz), 30.1, 29.6, 29.1, 22.7, 21.5 (d,  $J = 3.8$  Hz) 14.2.  $^{31}\text{P}$  NMR (243 MHz,  $\text{CDCl}_3$ )  $\delta$  33.24. This compound is known in the literature: C. K. Li, Z. K. Tao, A. Shoberu, W. Zhang, J. P. Zou, *Org. Lett.*, **2022**, *24*, 6083–6087.

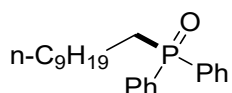

**Decyldiphenylphosphine Oxide(3aq)**, white solid.  $^1\text{H}$  NMR (600 MHz,  $\text{CDCl}_3$ )  $\delta$  7.77 – 7.71 (m, 4H), 7.54 – 7.49 (m, 2H), 7.49 – 7.43 (m, 4H), 2.29 – 2.21 (m, 2H), 1.68 – 1.55 (m, 2H), 1.43 – 1.34 (m, 2H), 1.31 – 1.18 (m, 12H), 0.87 (t,  $J = 7.2$  Hz, 3H).  $^{13}\text{C}$  NMR (151 MHz,  $\text{CDCl}_3$ )  $\delta$  133.3 (d,  $J = 97.7$  Hz), 131.7, 130.9 (d,  $J = 9.4$  Hz), 128.7 (d,  $J = 11.5$  Hz), 31.9, 31.1 (d,  $J = 14.6$  Hz), 30.1, 29.6, 29.4, 29.3, 29.2, 22.7, 21.5 (d,  $J = 3.8$  Hz), 14.2.  $^{31}\text{P}$  NMR (243 MHz,  $\text{CDCl}_3$ )  $\delta$  33.24. This compound is known in the literature: C. K. Li, Z. K. Tao, A. Shoberu, W. Zhang, J. P. Zou, *Org. Lett.*, **2022**, *24*, 6083–6087.

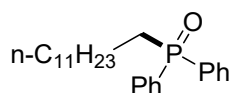

**Dodecyldiphenylphosphine Oxide(3ar)**, white solid.  $^1\text{H}$  NMR (600 MHz,  $\text{CDCl}_3$ )  $\delta$  7.80 – 7.70 (m, 4H), 7.55 – 7.49 (m, 2H), 7.49 – 7.44 (m, 4H), 2.27 – 2.25 (m, 2H), 1.69 – 1.57 (m, 2H), 1.38 (dd,  $J = 14.4, 7.8$  Hz, 2H), 1.28 – 1.17 (m, 16H), 0.94 – 0.84 (m, 3H).  $^{13}\text{C}$  NMR (151 MHz,  $\text{CDCl}_3$ )  $\delta$  133.2 (d,  $J = 97.8$  Hz), 131.7 (d,  $J = 1.9$  Hz), 130.9 (d,  $J = 9.1$  Hz), 128.7 (d,  $J = 11.5$  Hz), 32.0, 31.1 (d,  $J = 14.9$  Hz), 30.0, 29.7, 29.64, 29.56, 29.5, 29.4, 29.2, 22.8, 21.5 (d,  $J = 3.8$  Hz), 14.2.  $^{31}\text{P}$  NMR (243 MHz,  $\text{CDCl}_3$ )  $\delta$  33.45. This compound is known in the literature: C. K. Li, Z. K. Tao, A. Shoberu, W. Zhang, J. P. Zou, *Org. Lett.*, **2022**, *24*, 6083–6087.

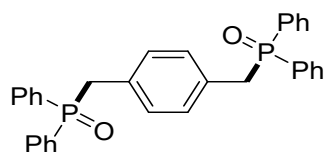

**(1,4-Phenylenebis(methylene))bis(diphenylphosphine Oxide) (3au)**, white solid.  $^1\text{H}$  NMR (600 MHz,  $\text{CDCl}_3$ )  $\delta$  7.63 (dd,  $J = 10.2, 8.4$  Hz, 8H), 7.53 – 7.44 (m, 4H), 7.39 (t,  $J = 6.6$  Hz, 8H), 6.93 (s, 4H), 3.56 (d,  $J = 13.8$  Hz, 4H).  $^{13}\text{C}$  NMR (151 MHz,  $\text{CDCl}_3$ )  $\delta$  132.7 (d,  $J = 99.7$  Hz), 131.7, 131.2 (d,  $J = 8.9$  Hz), 130.2, 1230.0 (d,  $J = 3.0$  Hz), 128.4 (d,  $J = 11.8$  Hz), 38.0 (d,  $J = 67.2$  Hz).  $^{31}\text{P}$  NMR (243 MHz,  $\text{CDCl}_3$ )  $\delta$  29.33. This compound is known in the literature: X. T. Ma, Q. Xu, H. Li, C. L. Su, L. Yu, X. Zhang, H. Cao, L. B. Han, *Green Chem.*, **2018**, *20*, 3408–3413.

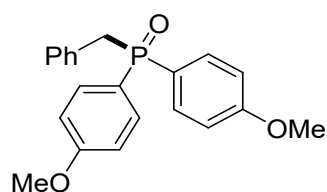

**Benzylbis(4-methoxyphenyl)phosphine Oxide(3ba)**, white solid.  $^1\text{H}$  NMR (600 MHz,  $\text{CDCl}_3$ )  $\delta$  7.60 – 7.55 (m, 4H), 7.21 – 7.16 (m, 3H), 7.12 – 7.05 (m, 2H), 6.94 – 6.91 (m, 4H), 3.83 (s, 6H), 3.58 (d,  $J = 13.8$  Hz, 2H).  $^{13}\text{C}$  NMR (151 MHz,  $\text{CDCl}_3$ )  $\delta$  162.3, 133.1 (d,  $J = 10.4$  Hz), 131.7 (d,  $J = 7.5$  Hz), 130.2 (d,  $J = 5.3$  Hz), 128.4, 126.7, 123.7 (d,  $J = 105.5$  Hz), 114.1 (d,  $J = 12.6$  Hz), 55.4, 38.7 (d,  $J = 67.3$  Hz).  $^{31}\text{P}$  NMR (243 MHz,  $\text{CDCl}_3$ )  $\delta$  30.32. This compound is known in the literature: L. Liu, Y. Y. Tang, K. Y. Wang, T. Z. Huang, T. Q. Chen, *J. Org. Chem.*, **2021**, *86*, 4159–4170.



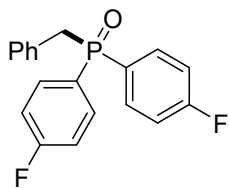

**Benzylbis(4-Fluorophenyl)Phosphine Oxide(3ca)**, white solid.  $^1\text{H}$  NMR (600 MHz,  $\text{CDCl}_3$ )  $\delta$  7.70 – 7.62 (m, 4H), 7.22 – 7.19 (m, 3H), 7.16 – 7.13 (m, 4H), 7.10 – 7.05 (m, 2H), 3.63 (d,  $J = 13.8$  Hz, 2H).  $^{13}\text{C}$  NMR (151 MHz,  $\text{CDCl}_3$ )  $\delta$  165.1 (d,  $J = 253.8$  Hz), 133.8 – 133.6 (m), 130.7 (d,  $J = 7.7$  Hz), 130.2 (d,  $J = 5.1$  Hz), 128.6 (d,  $J = 1.8$  Hz), 128.3 (d,  $J = 2.3$  Hz), 127.6 (d,  $J = 2.2$  Hz), 127.1 (s), 116.1 (dd,  $J = 21.1, 12.8$  Hz), 38.4 (d,  $J = 67.5$  Hz).  $^{31}\text{P}$  NMR (243 MHz,  $\text{CDCl}_3$ )  $\delta$  29.19. This compound is known in the literature: N. Li, F. Chen, G. H. Wang, Q. L. Zeng, *Monatsh. Chem.*, **2020**, *151*, 99 - 106.

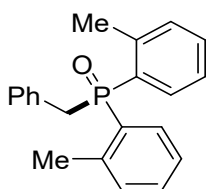

**Benzyl-di-O-Tolylphosphine Oxide(3da)**, white solid.  $^1\text{H}$  NMR (600 MHz,  $\text{CDCl}_3$ )  $\delta$  7.61 – 7.55 (m, 2H), 7.38 (td,  $J = 7.8, 1.2$  Hz, 2H), 7.22 (t,  $J = 7.2$  Hz, 2H), 7.18 – 7.13 (m, 5H), 7.04 (dd,  $J = 4.8, 2.4$  Hz, 2H), 3.74 (d,  $J = 13.2$  Hz, 2H), 2.21 (s, 6H).  $^{13}\text{C}$  NMR (151 MHz,  $\text{CDCl}_3$ )  $\delta$  142.4 (d,  $J = 8.0$  Hz), 131.8 (d,  $J = 6.8$  Hz), 131.7 (d,  $J = 36.1$  Hz), 131.5, 131.3 (d,  $J = 7.6$  Hz), 131.2 (s), 130.4 (d,  $J = 5.2$  Hz), 128.3, 126.8, 125.6 (d,  $J = 12.2$  Hz), 37.5 (d,  $J = 66.2$  Hz), 21.1 (d,  $J = 3.6$  Hz).  $^{31}\text{P}$  NMR (243 MHz,  $\text{CDCl}_3$ )  $\delta$  32.07. This compound is known in the literature: L. Liu, Y. Y. Tang, K. Y. Wang, T. Z. Huang, T. Q. Chen, *J. Org. Chem.*, **2021**, *86*, 4159–4170.

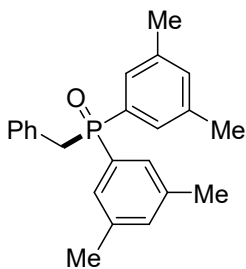

**Benzylbis(3,5-Dimethylphenyl)Phosphine Oxide(3ea)**, white solid.  $^1\text{H}$  NMR (600 MHz,  $\text{CDCl}_3$ )  $\delta$  138.2 (d,  $J = 12.0$  Hz), 133.5, 132.2 (d,  $J = 98.1$  Hz), 131.6 (d,  $J = 7.6$

Hz), 130.3 (d,  $J = 5.3$  Hz), 128.8 (d,  $J = 9.1$  Hz), 128.4, 126.7, 38.2 (d,  $J = 65.9$  Hz), 21.4.  $^{31}\text{P}$  NMR (243 MHz,  $\text{CDCl}_3$ )  $\delta$  30.70. This compound is known in the literature: N. Li, F. Chen, G. H. Wang, Q. L. Zeng, *Monatsh. Chem.*, **2020**, *151*, 99 - 106.

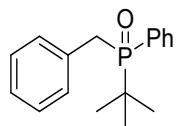

**Benzyl(tert-butyl)(phenyl)Phosphine Oxide(3fa)**, white solid.  $^1\text{H}$  NMR (600 MHz,  $\text{CDCl}_3$ )  $\delta$  7.80 – 7.65 (m, 2H), 7.51 – 7.40 (m, 3H), 7.30-7.26 (m, 2H), 7.19 (t,  $J = 7.8$  Hz, 2H), 7.16 – 7.10 (m, 1H), 3.51 (t,  $J = 14.4$  Hz, 1H), 3.42 (dd,  $J = 14.4, 9.6$  Hz, 1H), 1.15 (d,  $J = 14.4$  Hz, 9H).  $^{13}\text{C}$  NMR (151 MHz,  $\text{CDCl}_3$ )  $\delta$  132.1 (d,  $J = 7.6$  Hz), 132.0 (d,  $J = 7.6$  Hz), 131.5 (d,  $J = 2.0$  Hz), 130.2 (d,  $J = 4.9$  Hz), 129.8 (d,  $J = 87.8$  Hz), 128.5, 128.1 (d,  $J = 10.4$  Hz), 126.6, 33.5 (d,  $J = 67.9$  Hz), 31.4 (d,  $J = 59.0$  Hz), 24.82 (s).  $^{31}\text{P}$  NMR (243 MHz,  $\text{CDCl}_3$ )  $\delta$  46.99. This compound is known in the literature: L. Liu, Y. Y. Tang, K. Y. Wang, T. Z. Huang, T. Q. Chen, *J. Org. Chem.*, **2021**, *86*, 4159–4170.

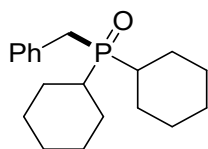

**Benzylcyclohexylphosphine Oxide(3ga)**, white solid.  $^1\text{H}$  NMR (600 MHz,  $\text{CDCl}_3$ )  $\delta$  7.33-7.30 (m, 4H), 7.24 (t,  $J = 6.6$  Hz, 1H), 3.08 (d,  $J = 12.6$  Hz, 2H), 1.95 – 1.65 (m, 12H), 1.46 – 1.09 (m, 10H).  $^{13}\text{C}$  NMR (151 MHz,  $\text{CDCl}_3$ )  $\delta$  133.0 (d,  $J = 6.9$  Hz), 129.9 (d,  $J = 4.9$  Hz), 128.7, 126.7, 36.2 (d,  $J = 63.7$  Hz), 32.2 (d,  $J = 55.4$  Hz), 26.7 (dd,  $J = 12.3, 6.0$  Hz), 26.0, 25.8 (dd,  $J = 14.4, 2.0$  Hz).  $^{31}\text{P}$  NMR (243 MHz,  $\text{CDCl}_3$ )  $\delta$  49.07. This compound is known in the literature: S. Montel, T. Z. Jia, P. J. Walsh, *Org. Lett.*, **2014**, *16*, 130 – 133.

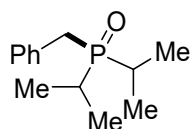

**Benzyl-diisopropylphosphine Oxide(3ha)**, white solid.  $^1\text{H}$  NMR (600 MHz,  $\text{CDCl}_3$ )  $\delta$  7.36 – 7.29 (m, 4H), 7.25 – 7.23 (m, 1H), 3.13 (d,  $J = 12.6$  Hz, 2H), 2.10 – 1.97 (m, 2H), 1.16 (dt,  $J = 15.2, 7.2$  Hz, 12H).  $^{13}\text{C}$  NMR (151 MHz,  $\text{CDCl}_3$ )  $\delta$  132.7, 129.9 (d,

$J = 4.7$  Hz), 128.8, 126.8, 31.9 (d,  $J = 56.1$  Hz), 25.7 (d,  $J = 63.8$  Hz), 16.1 (d,  $J = 19.9$  Hz).  $^{31}\text{P}$  NMR (243 MHz,  $\text{CDCl}_3$ )  $\delta$  55.29. HRMS (ESI) for  $\text{C}_{13}\text{H}_{22}\text{OP}$  (M+H): Calcd: 225.1408; found: 225.1405.

**Detailed Procedures for One-pot Synthesis of Phosphine Borane Complex 5a (Eq. 3 in the text).**

The mixture of **1a** (62.1  $\mu\text{L}$ , 0.60 mmol), **2a** (101.1 mg, 0.50 mmol) and TMSI (7.1  $\mu\text{L}$ , 10 mol%) sealed under  $\text{N}_2$  in a 25 mL Schlenk tube was heated at 80  $^\circ\text{C}$  for 12 h. Then the reaction mixture was analyzed by TLC/GC-MS and purified by washing the reaction mixture with a mixed solvent of ethyl acetate/petroleum ether (1:1) after the reaction under column chromatography-free conditions to give phosphine oxide **3aa**

To phosphine oxide **3aa** was added dry THF (1 mL), triethoxyl hydrosilane (1.5 mmol, 3.0 equiv.), and titanium (IV) isopropoxide (14.2 mg, 10 mol%) under nitrogen. The reaction mixture was heated at 80  $^\circ\text{C}$  for 1 h and cooled to room temperature, then  $\text{BH}_3\cdot\text{SMe}_2$  (150  $\mu\text{L}$ , 1.5 mmol, 3.0 equiv.) and dry 1,4-dioxane (1 mL) were added through the septum, and the mixture was stirred for an additional 4 hours at ambient temperature. Then, the reaction mixture was filtered through a short celite pad and washed with DCM (10 mL  $\times$  3). The solvent was removed under vacuum and the residue was purified by silica gel column chromatography with hexane/ethyl acetate as eluent to give the desired product **5a**.

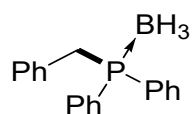

**Phosphine borane complex 5a**, white solid.  $^1\text{H}$  NMR (600 MHz,  $\text{CDCl}_3$ )  $\delta$  7.65 – 7.58 (m, 4H), 7.49 (td,  $J = 7.2, 1.2$  Hz, 2H), 7.41 (td,  $J = 7.8, 2.4$  Hz, 4H), 7.20 – 7.11 (m, 3H), 7.00 – 6.90 (m, 2H), 3.60 (d,  $J = 12.0$  Hz, 2H), 1.28 – 0.55 (m, 3H).  $^{13}\text{C}$  NMR (151 MHz,  $\text{CDCl}_3$ )  $\delta$  132.8 (d,  $J = 9.0$  Hz), 131.9, 131.4, 130.4 (d,  $J = 4.6$  Hz), 128.8 (d,  $J = 10.0$  Hz), 128.78 (d,  $J = 54.1$  Hz), 128.2, 127.1, 34.2 (d,  $J = 32.1$  Hz).  $^{31}\text{P}$  NMR (243 MHz,  $\text{CDCl}_3$ )  $\delta$  18.62 (m). This compound is known in the literature: R. F. Cheng, C. J. Li, *Angew. Chem. Int. Ed.*, **2023**, 62, e202301730.

**Detailed Procedures for One-pot Synthesis of Phosphine Sulfide 6a (Eq. 4 in the text).**

The mixture of **1a** (62.1  $\mu$ L, 0.60 mmol), **2a** (101.1 mg, 0.50 mmol) and TMSI (7.1  $\mu$ L, 10 mol%) sealed under N<sub>2</sub> in a 25 mL Schlenk tube was heated at 80 °C for 12 h. Then the reaction mixture was analyzed by TLC/GC-MS and purified by washing the reaction mixture with a mixed solvent of ethyl acetate/petroleum ether (1:1) after the reaction under column chromatography-free conditions to give phosphine oxide **3aa**

To phosphine oxide **3aa** was added dry THF (1 mL), triethoxyl hydrosilane (1.5 mmol, 3.0 equiv.), and titanium (IV) isopropoxide (14.2 mg, 10 mol%) under nitrogen. The reaction mixture was heated at 80 °C for 1 h and cooled to room temperature, then S<sub>8</sub> (64.0 mg, 2.0 mmol, 4.0 equiv.) and dry 1,4-dioxane (1 mL) were added into the tube and the resulting mixture was stirred for another 12 hrs. Then the reaction mixture was filtered through a short celite pad and washed with DCM (10 mL  $\times$  3). The solvent was removed under vacuum and the residue was purified by silica gel column chromatography with hexane/ethyl acetate as eluent to give the desired product **6a**.

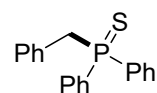

**Benzylidiphenylphosphine sulfide(6a)**, white solid. <sup>1</sup>H NMR (600 MHz, CDCl<sub>3</sub>)  $\delta$  7.82 – 7.73 (m, 4H), 7.53 – 7.47 (m, 2H), 7.46 – 7.39 (m, 4H), 7.21 – 7.11 (m, 3H), 7.02 – 6.95 (m, 2H), 3.83 (d,  $J$  = 13.8 Hz, 2H). <sup>13</sup>C NMR (151 MHz, CDCl<sub>3</sub>)  $\delta$  132.1 (d,  $J$  = 80.0 Hz), 131.6, 131.5, 130.7 (d,  $J$  = 7.4 Hz), 130.5 (d,  $J$  = 5.5 Hz), 128.5 (d,  $J$  = 12.0 Hz), 127.9 (d,  $J$  = 2.4 Hz), 127.1 (d,  $J$  = 2.9 Hz), 40.9 (d,  $J$  = 50.7 Hz). <sup>31</sup>P NMR (243 MHz, CDCl<sub>3</sub>)  $\delta$  42.79. This compound is known in the literature: R. F. Cheng, C. J. Li, *Angew. Chem. Int. Ed.*, **2023**, *62*, e202301730.

**Detailed Procedures for One-pot Synthesis of a Phosphine Ligand (Eq. 2 in the text).**

The mixture of **1a** (62.1  $\mu$ L, 0.60 mmol), **2a** (101.1 mg, 0.50 mmol) and TMSI

(7.1  $\mu$ L, 10 mol%) sealed under N<sub>2</sub> in a 25 mL Schlenk tube was heated at 80 °C for 12 h. Then the reaction mixture was analyzed by TLC/GC-MS and purified by washing the reaction mixture with a mixed solvent of ethyl acetate/petroleum ether (1:1) after the reaction under column chromatography-free conditions to give phosphine oxide **3aa**

To phosphine oxide **3aa** was added dry THF (1 mL), triethoxyl hydrosilane (1.5 mmol, 3.0 equiv.), and titanium (IV) isopropoxide (14.2 mg, 10 mol%) under nitrogen. The reaction mixture was then heated at 80 °C for 1 h and cooled to room temperature to give the crude benzyldiphenylphosphine **7a**. Since **7a** is air-sensitive and not isolable by usual procedures, benzyl bromide (171 mg, 1 mmol, 2.0 equiv.) was added to **7a** and then heated at 80 °C under nitrogen for 1 h. The target dibenzylidiphenylphosphonium bromide [PPh<sub>2</sub>(CH<sub>2</sub>Ph)<sub>2</sub>]<sup>+</sup>Br<sup>-</sup> **10a** was obtained in 84% yield by filtration and wash with ethyl acetate.

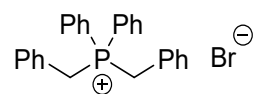

**Dibenzylidiphenylphosphonium Bromide(10a)**, white solid. <sup>1</sup>H NMR (600 MHz, CDCl<sub>3</sub>)  $\delta$  7.73 – 7.68 (m, 2H), 7.65 (dd,  $J$  = 12.0, 8.4 Hz, 4H), 7.56 – 7.49 (m, 4H), 7.17 – 7.11 (m, 2H), 7.05 (t,  $J$  = 7.2 Hz, 4H), 7.00 (dd,  $J$  = 7.2, 1.8 Hz, 4H), 4.95 (d,  $J$  = 14.4 Hz, 4H). <sup>13</sup>C NMR (151 MHz, CDCl<sub>3</sub>)  $\delta$  134.82 (d,  $J$  = 2.0 Hz), 134.43 (d,  $J$  = 8.7 Hz), 130.90 (d,  $J$  = 5.5 Hz), 129.70 (d,  $J$  = 12.5 Hz), 128.86 (d,  $J$  = 2.5 Hz), 128.21 (d,  $J$  = 3.7 Hz), 127.58 (d,  $J$  = 8.6 Hz), 116.66 (d,  $J$  = 82.5 Hz), 29.51 (d,  $J$  = 45.1 Hz). <sup>31</sup>P NMR (243 MHz, CDCl<sub>3</sub>)  $\delta$  27.3. This compound is known in the literature: X. T. Ma, Q. Xu, H. Li, C. L. Su, L. Yu, X. Zhang, H. Cao, L. B. Han, *Green Chem.*, **2018**, *20*, 3408–3413.



$^{31}\text{P}$  NMR (243 MHz,  $\text{CDCl}_3$ )

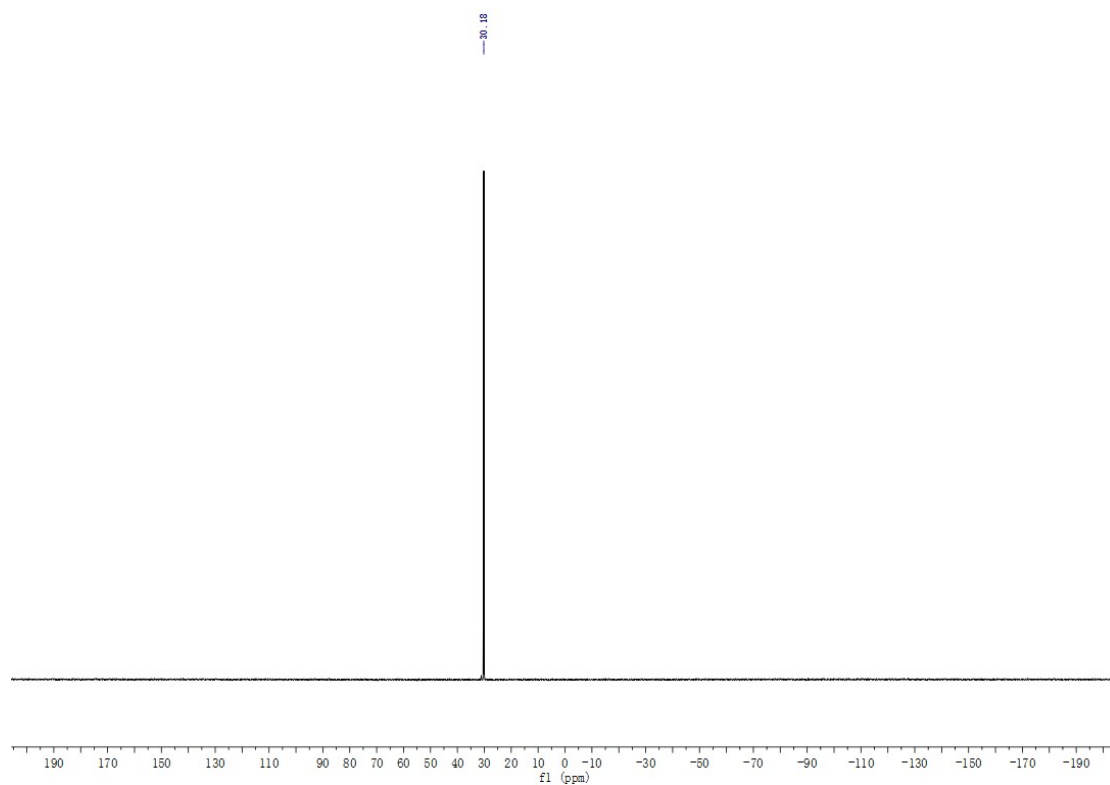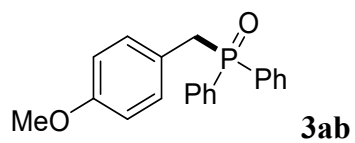

$^1\text{H}$  NMR (600 MHz,  $\text{CDCl}_3$ )

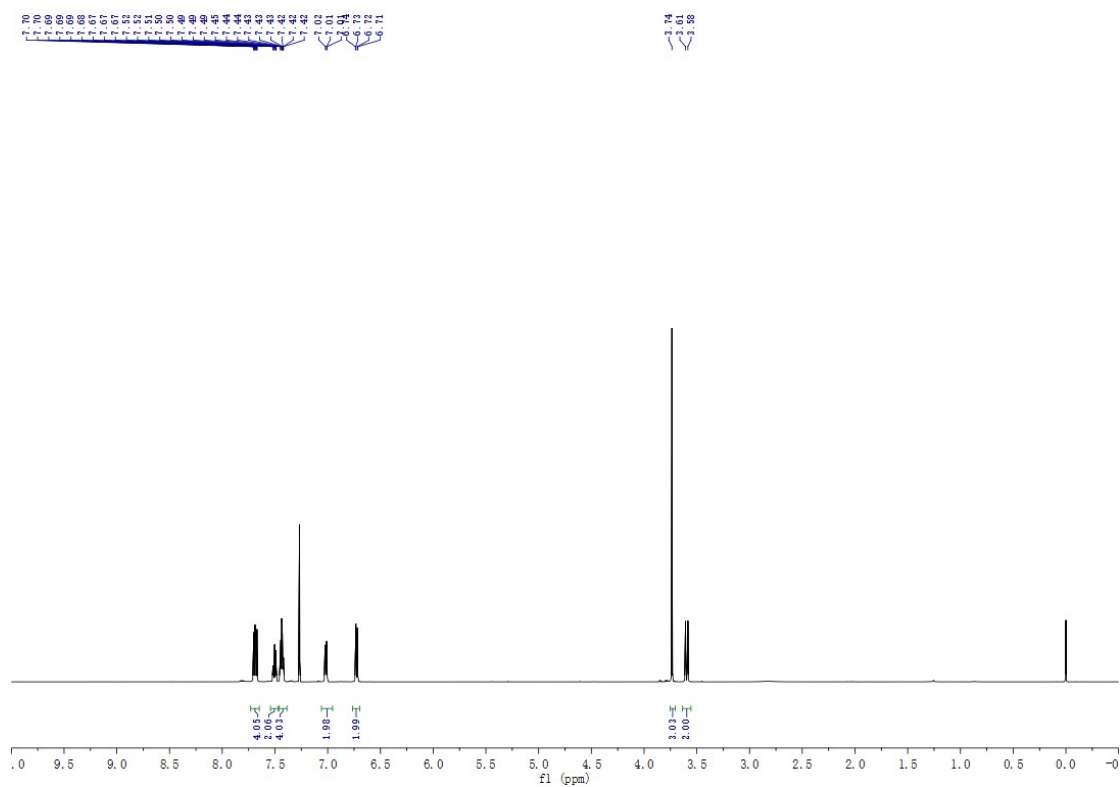

$^{13}\text{C}$  NMR (151 MHz,  $\text{CDCl}_3$ )

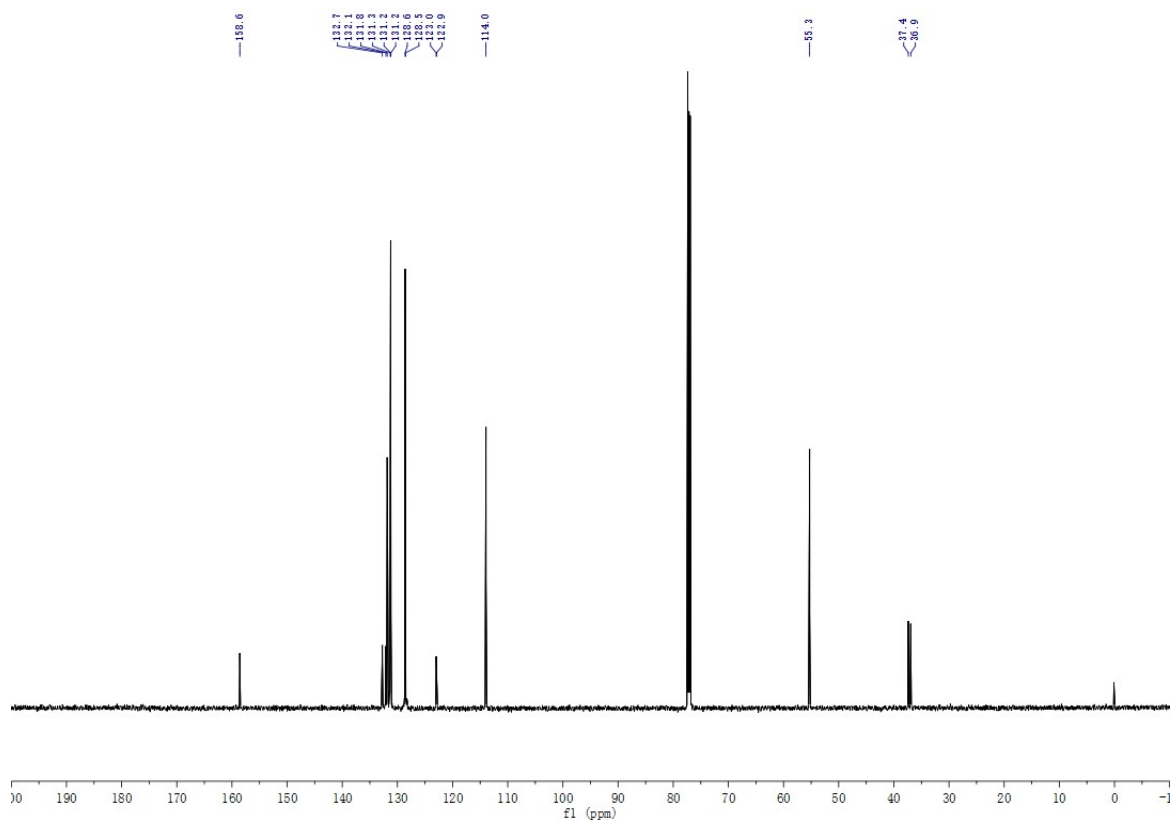

$^{31}\text{P}$  NMR (243 MHz,  $\text{CDCl}_3$ )

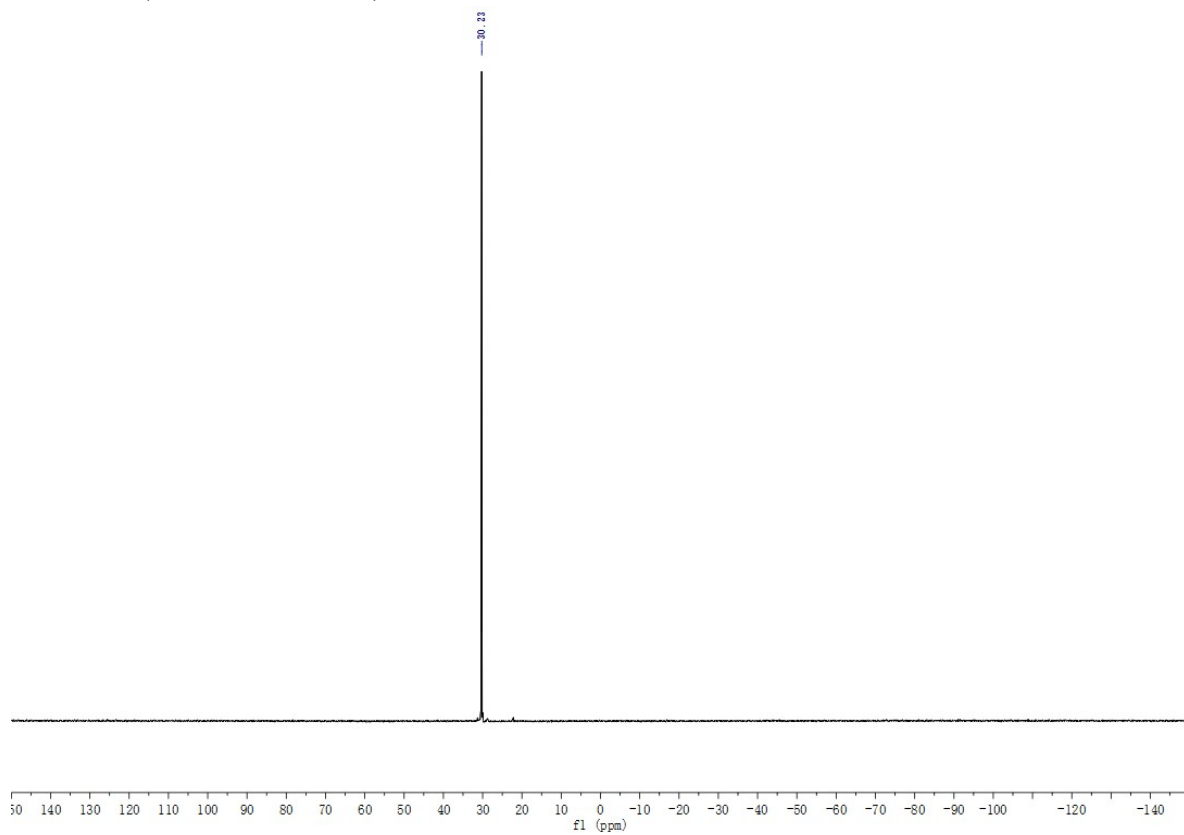



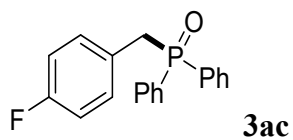

<sup>1</sup>H NMR (600 MHz, CDCl<sub>3</sub>)

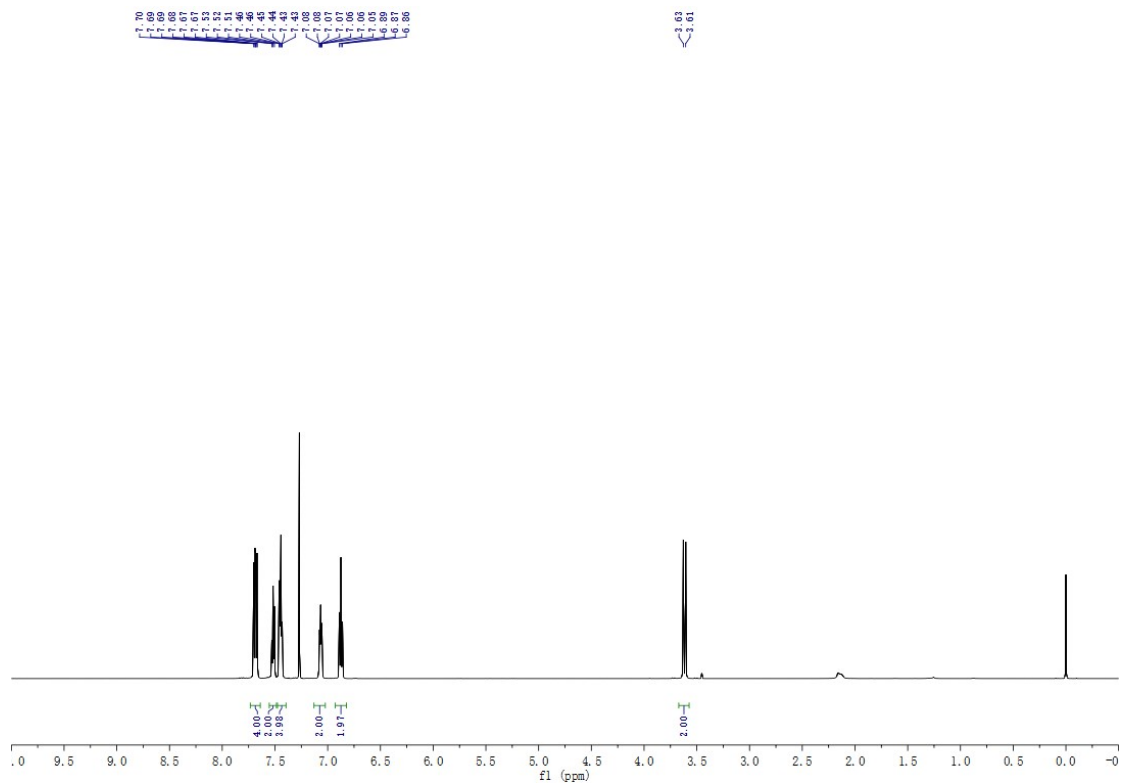

<sup>13</sup>C NMR (151 MHz, CDCl<sub>3</sub>)

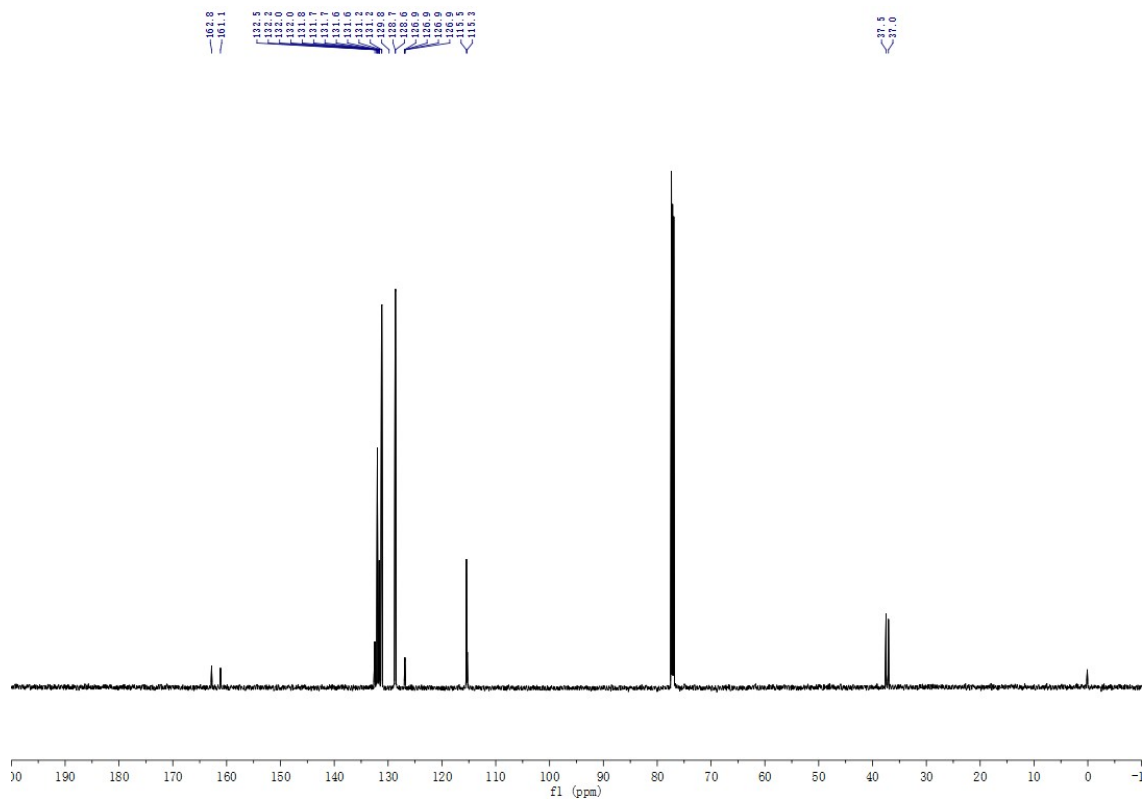

$^{31}\text{P}$  NMR (243 MHz,  $\text{CDCl}_3$ )

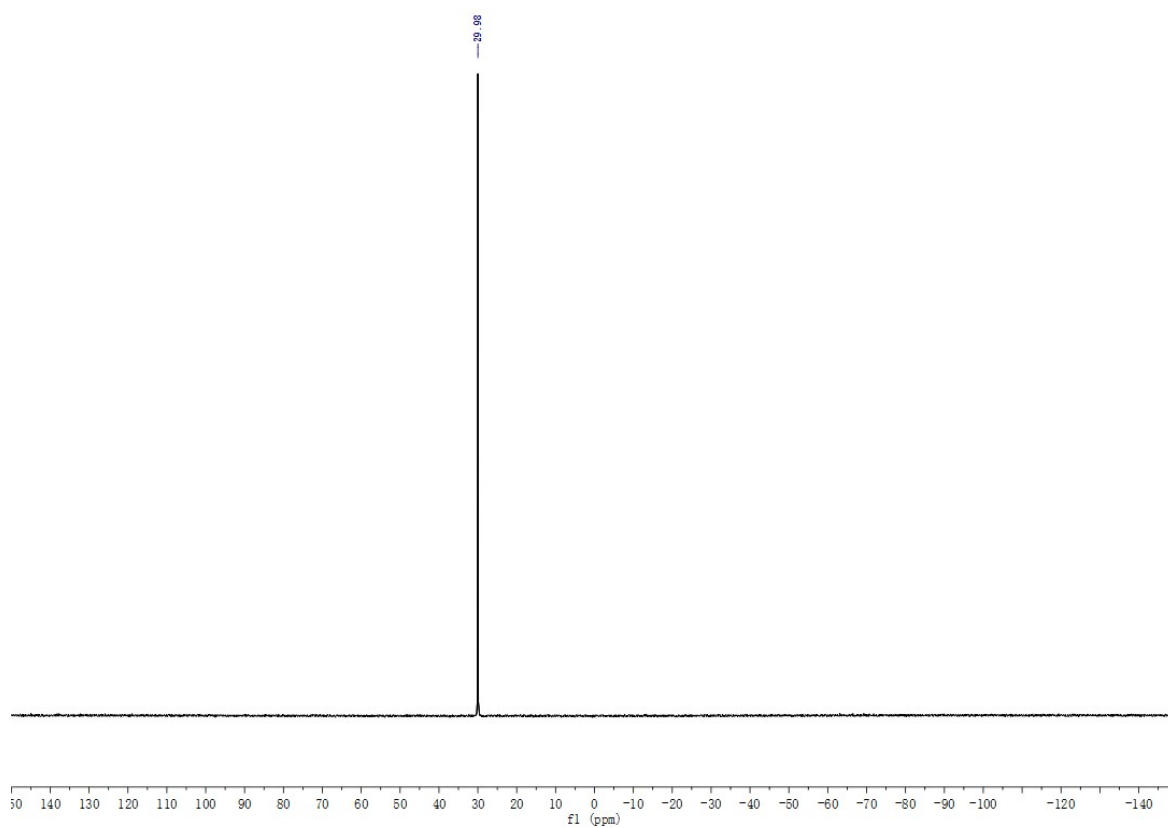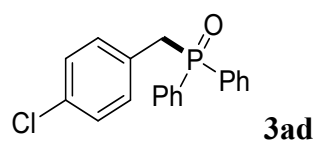

$^1\text{H}$  NMR (600 MHz,  $\text{CDCl}_3$ )

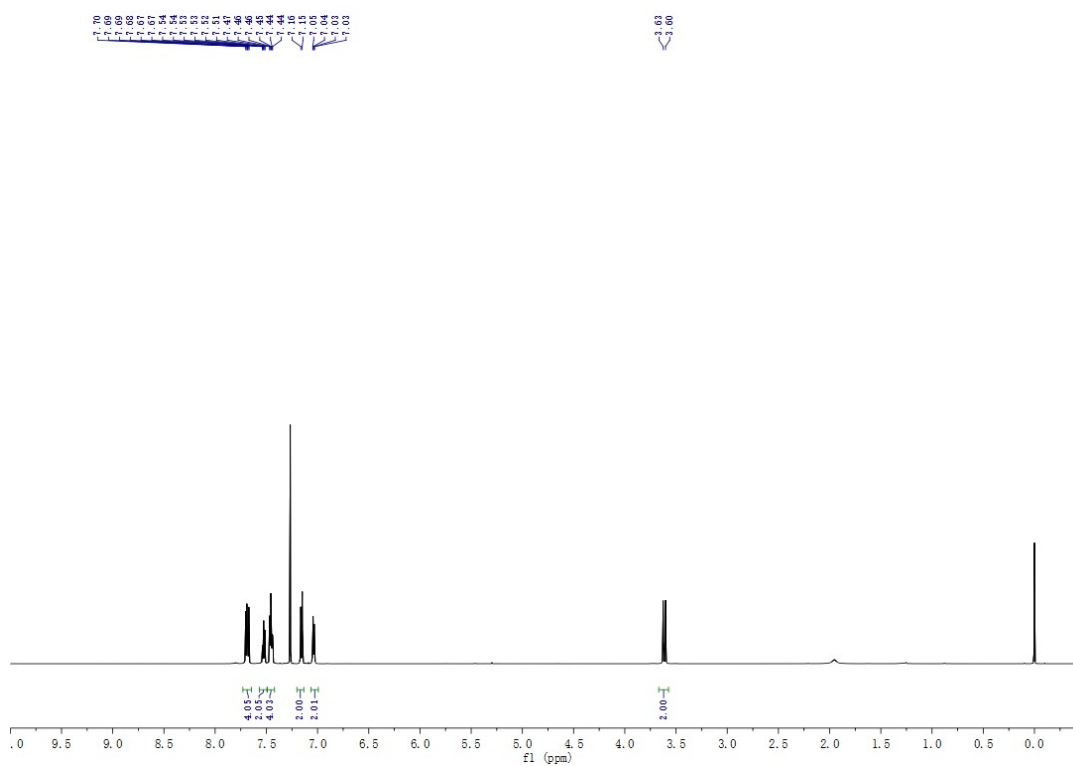







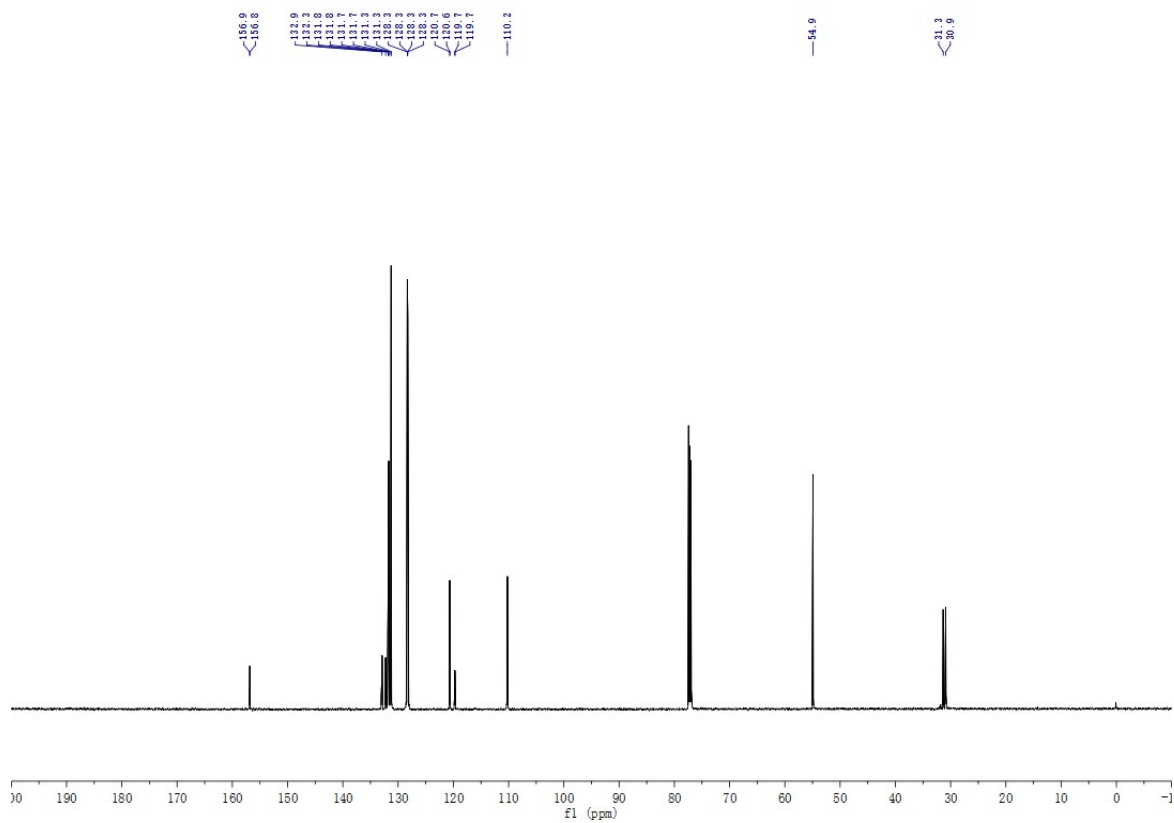

$^{31}\text{P}$  NMR (243 MHz,  $\text{CDCl}_3$ )

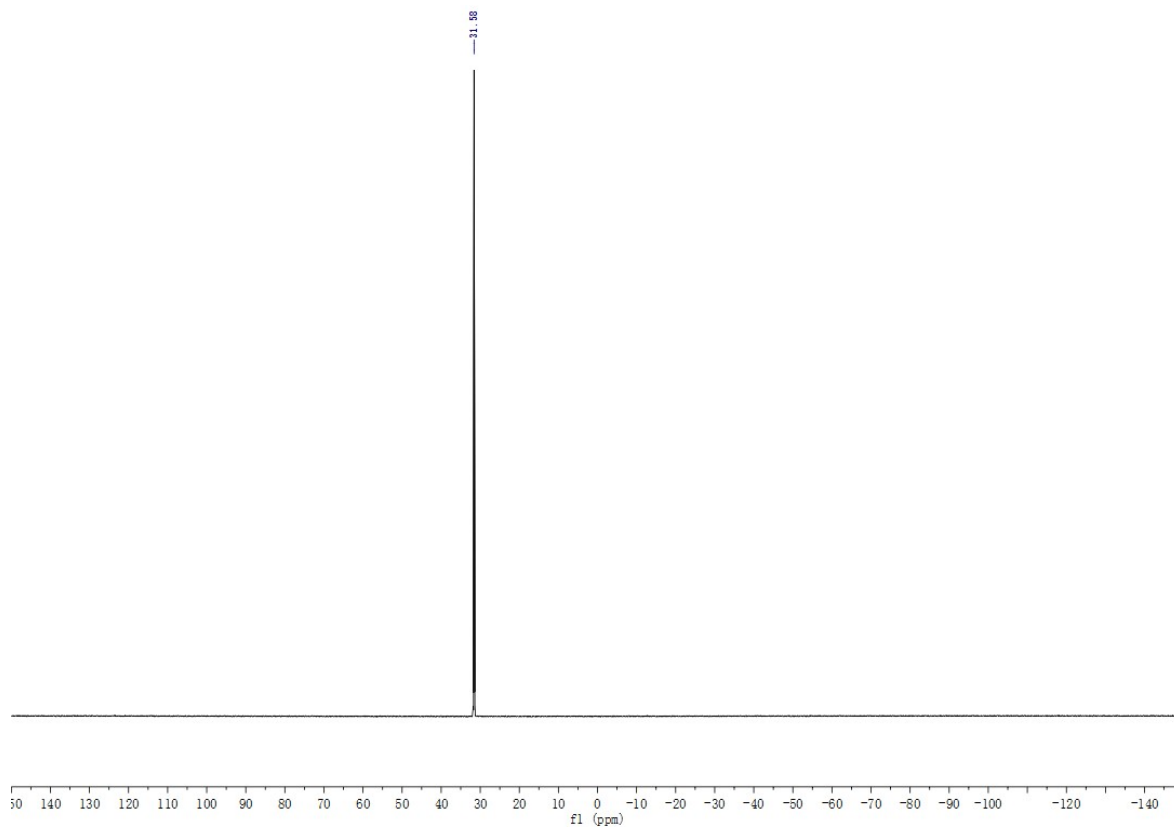



$^{31}\text{P}$  NMR (243 MHz,  $\text{CDCl}_3$ )

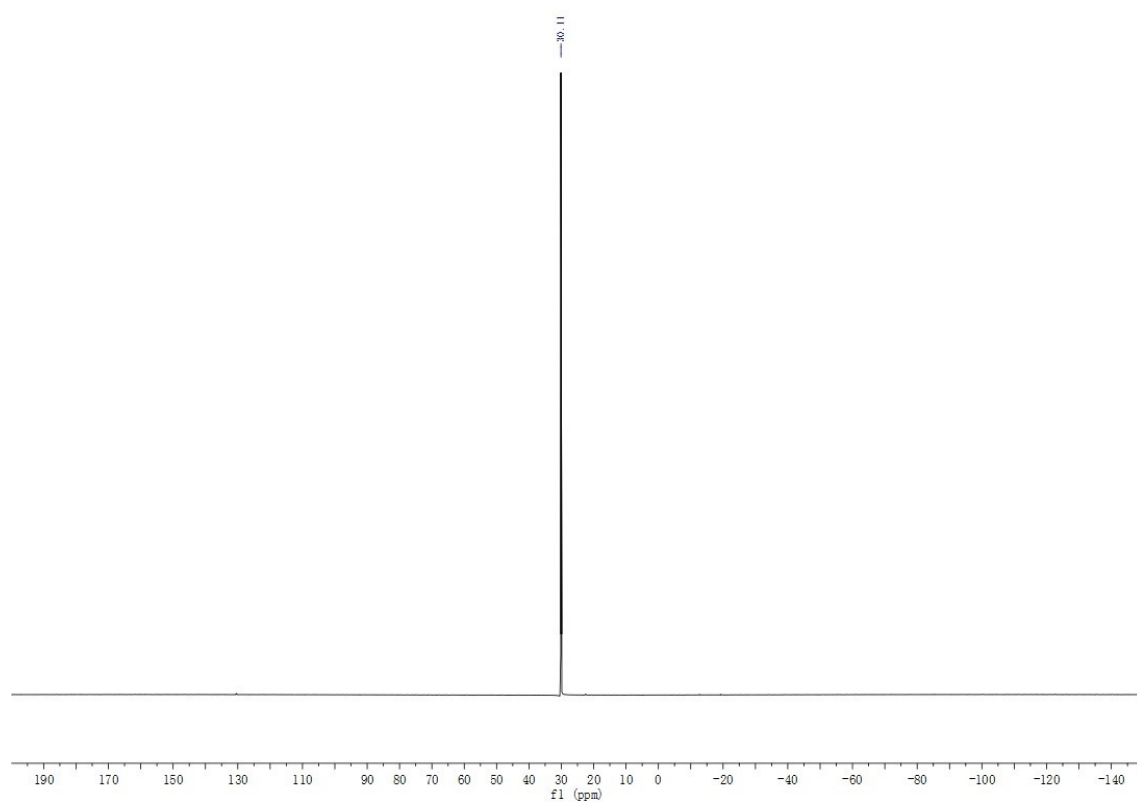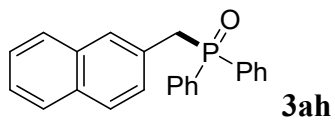

$^1\text{H}$  NMR (600 MHz,  $\text{CDCl}_3$ )

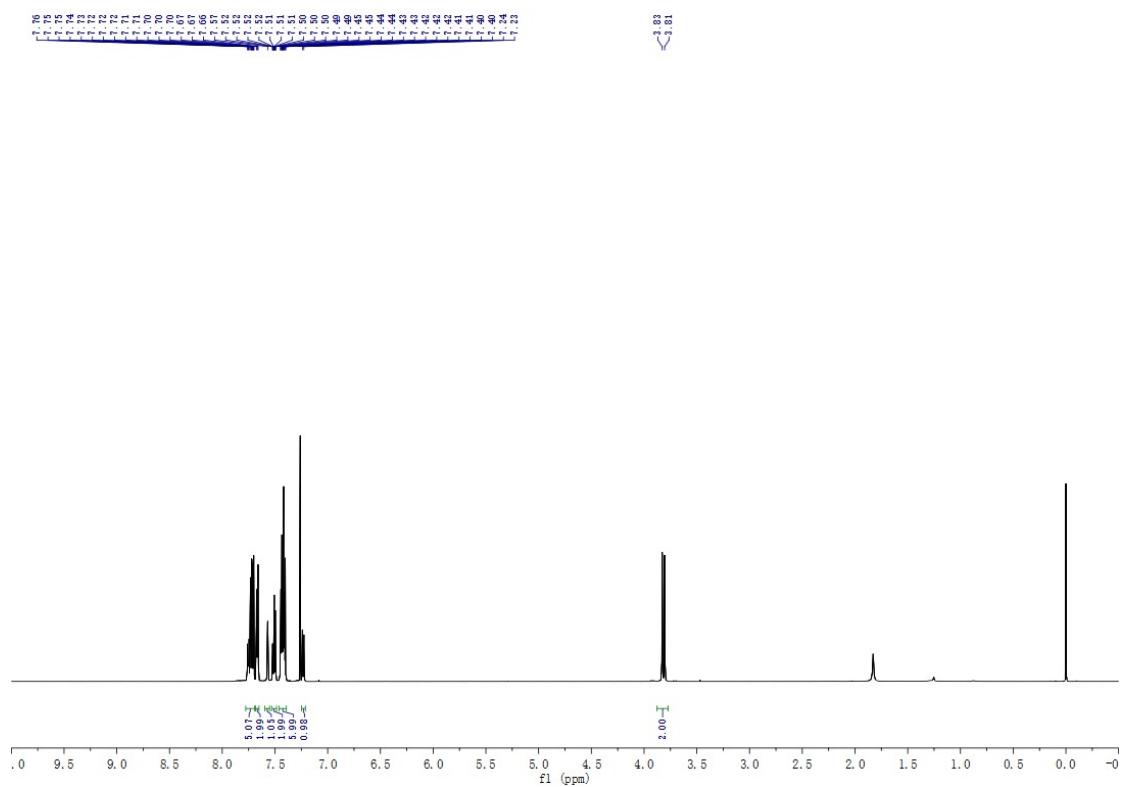



$^{13}\text{C}$  NMR (151 MHz,  $\text{CDCl}_3$ )

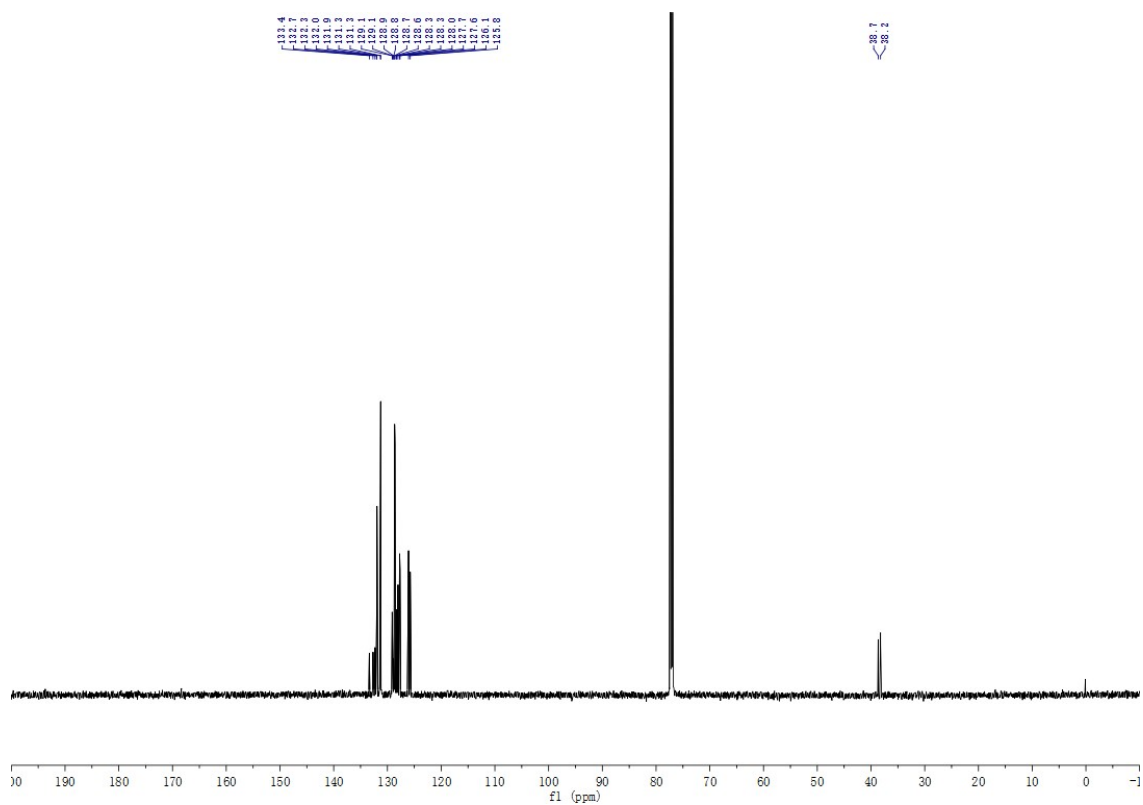

$^{31}\text{P}$  NMR (243 MHz,  $\text{CDCl}_3$ )

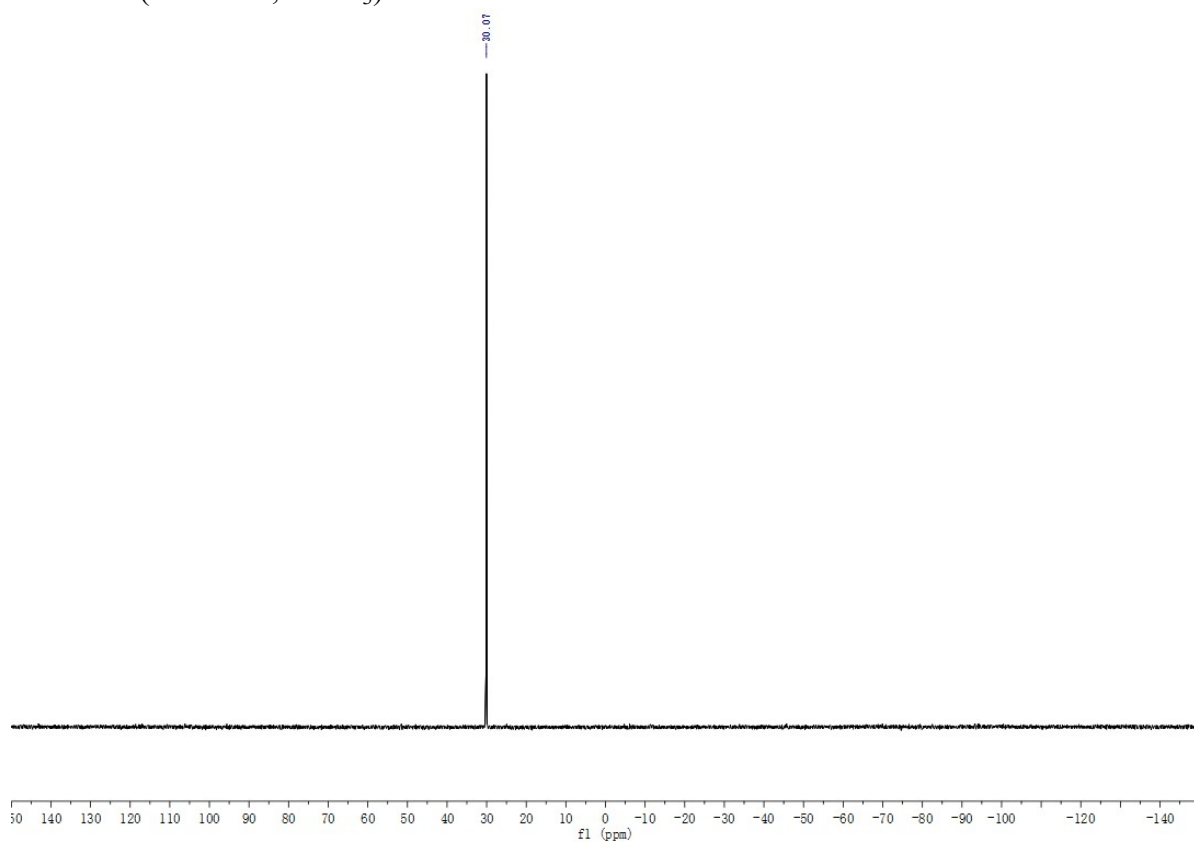



$^{31}\text{P}$  NMR (243 MHz,  $\text{CDCl}_3$ )

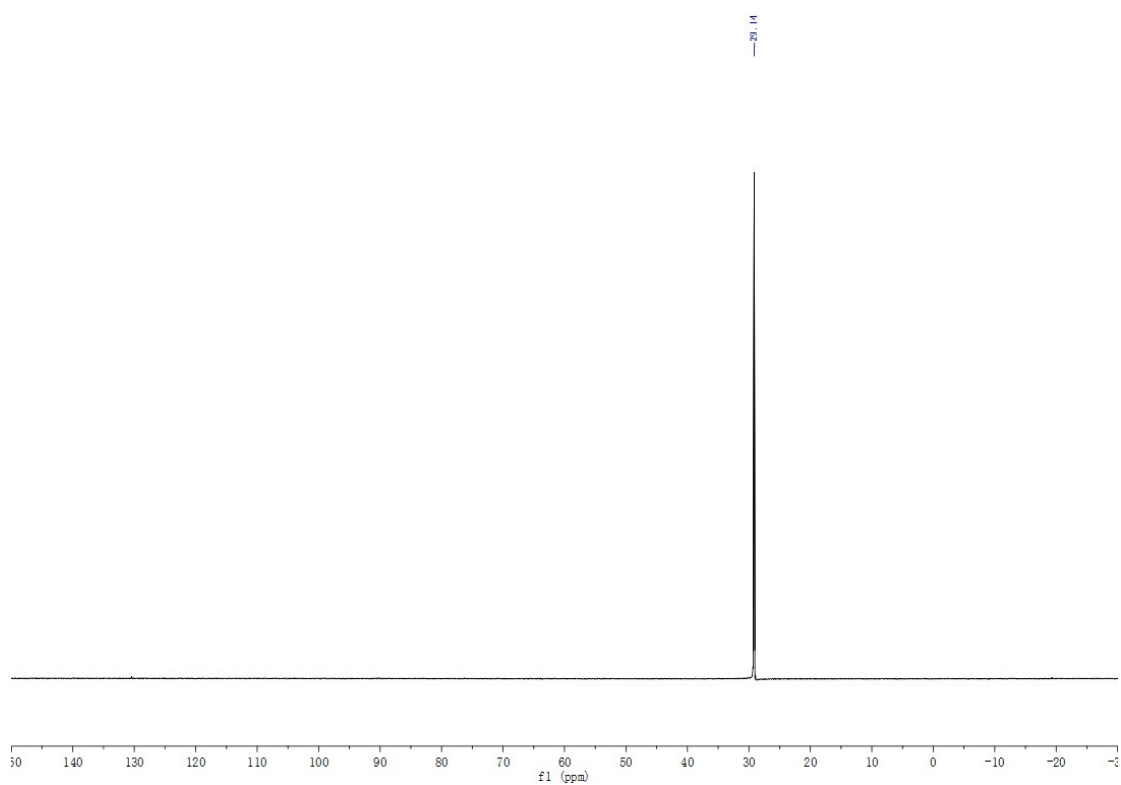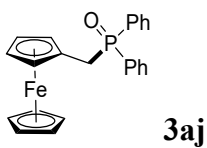

$^1\text{H}$  NMR (600 MHz,  $\text{CDCl}_3$ )

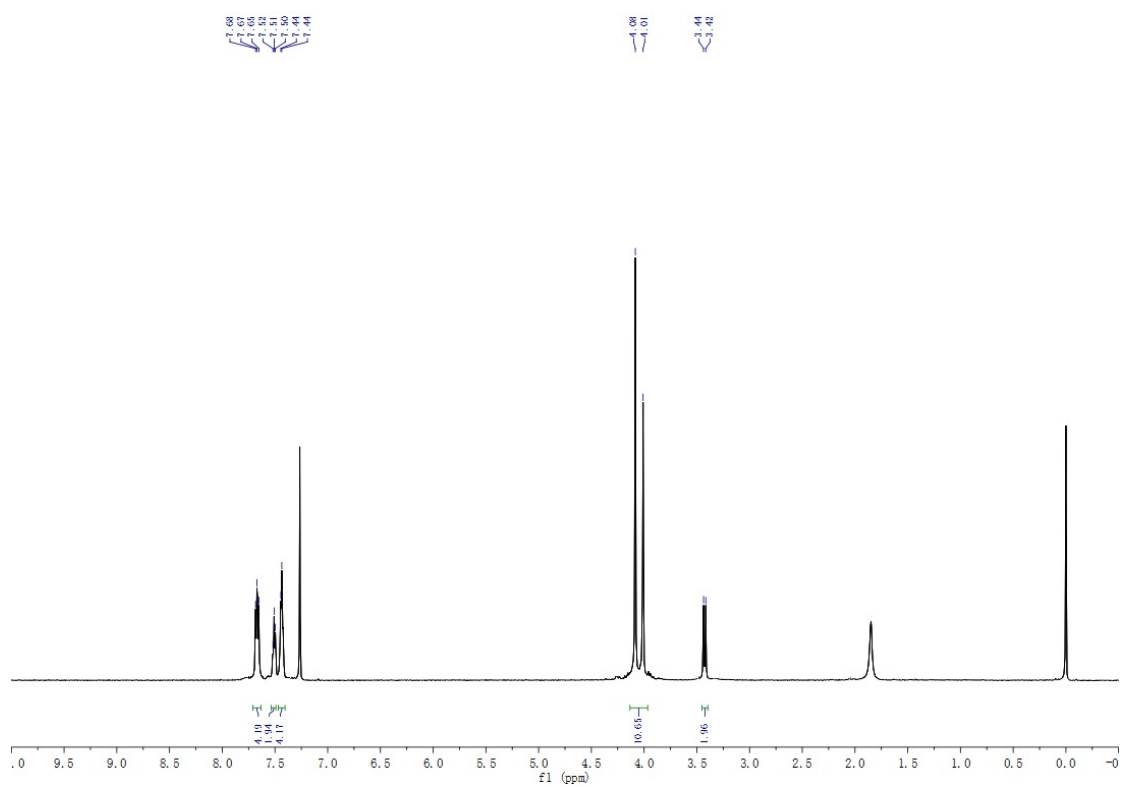

$^{13}\text{C}$  NMR (151 MHz,  $\text{CDCl}_3$ )

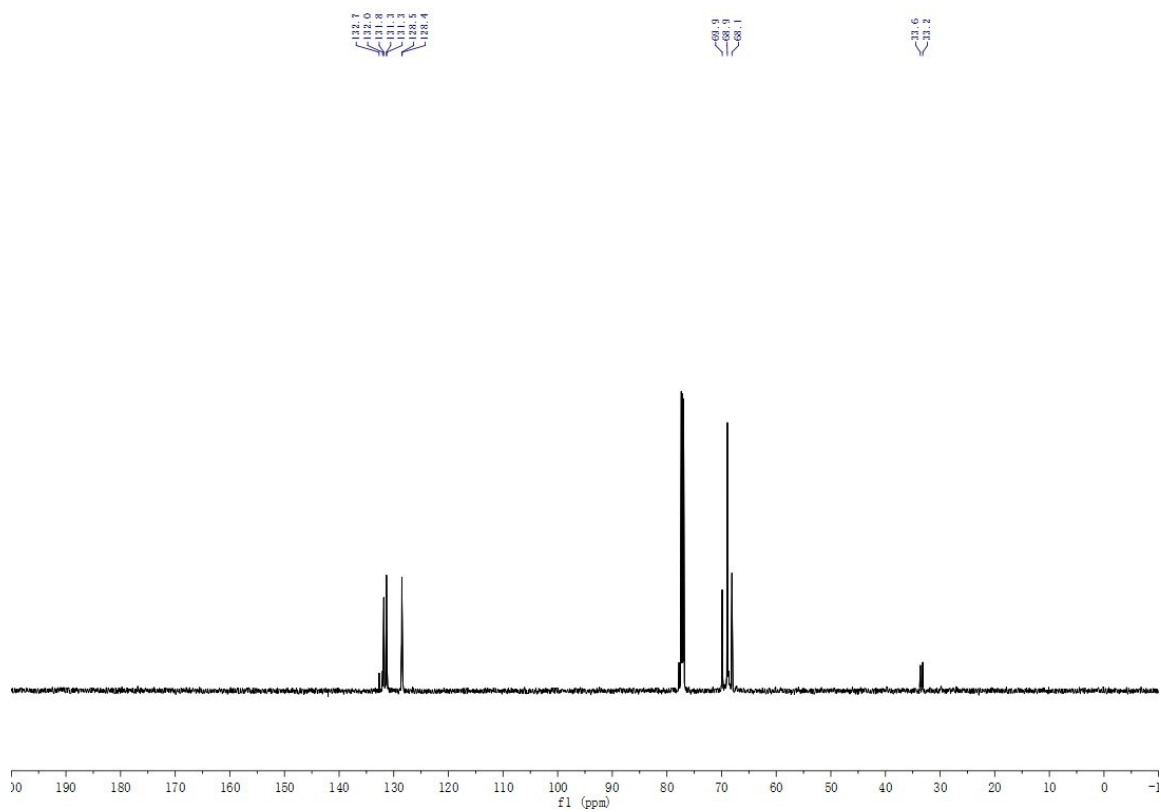

$^{31}\text{P}$  NMR (243 MHz,  $\text{CDCl}_3$ )

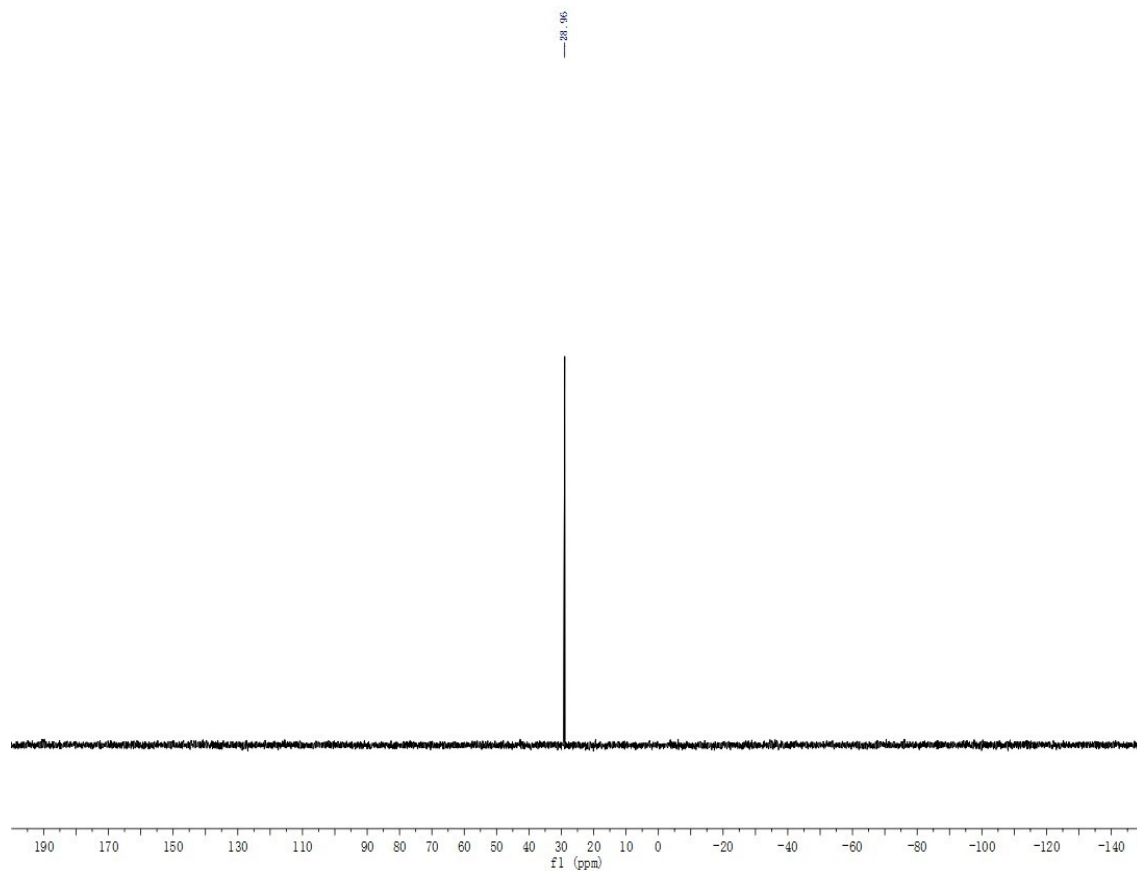



$^{31}\text{P}$  NMR (243 MHz,  $\text{CDCl}_3$ )

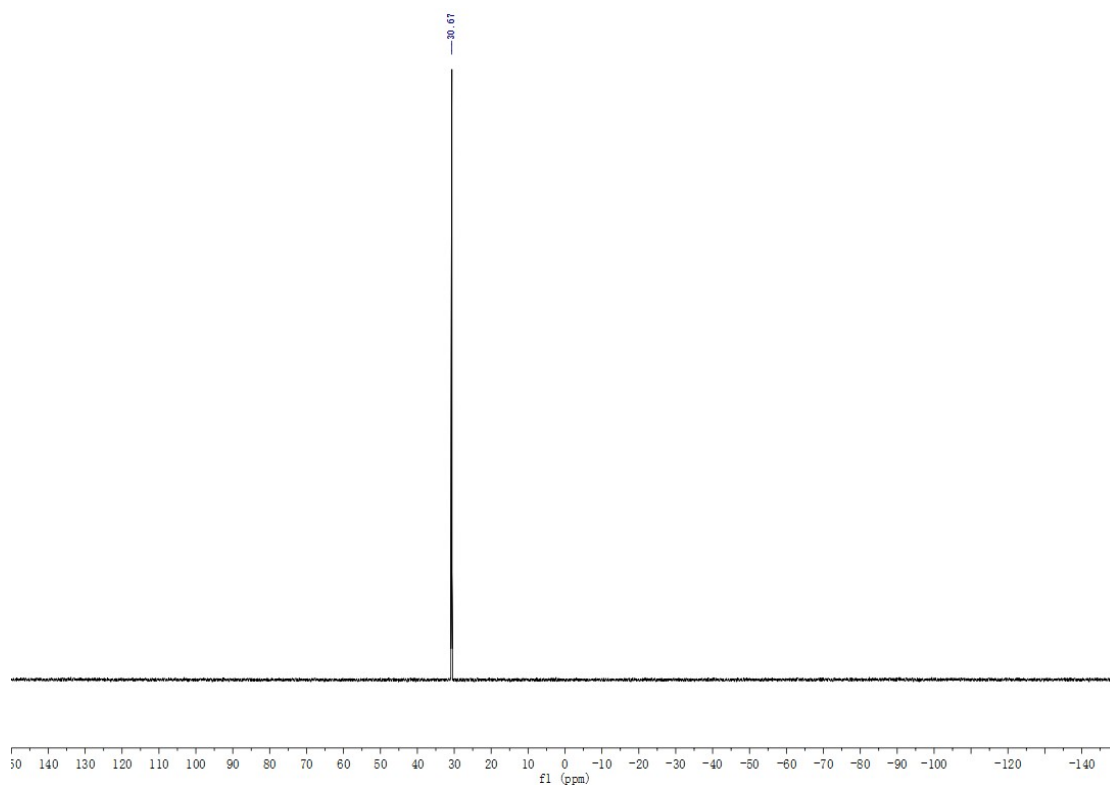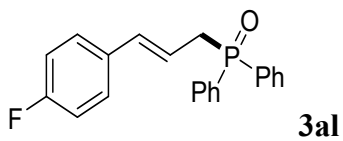

$^1\text{H}$  NMR (600 MHz,  $\text{CDCl}_3$ )

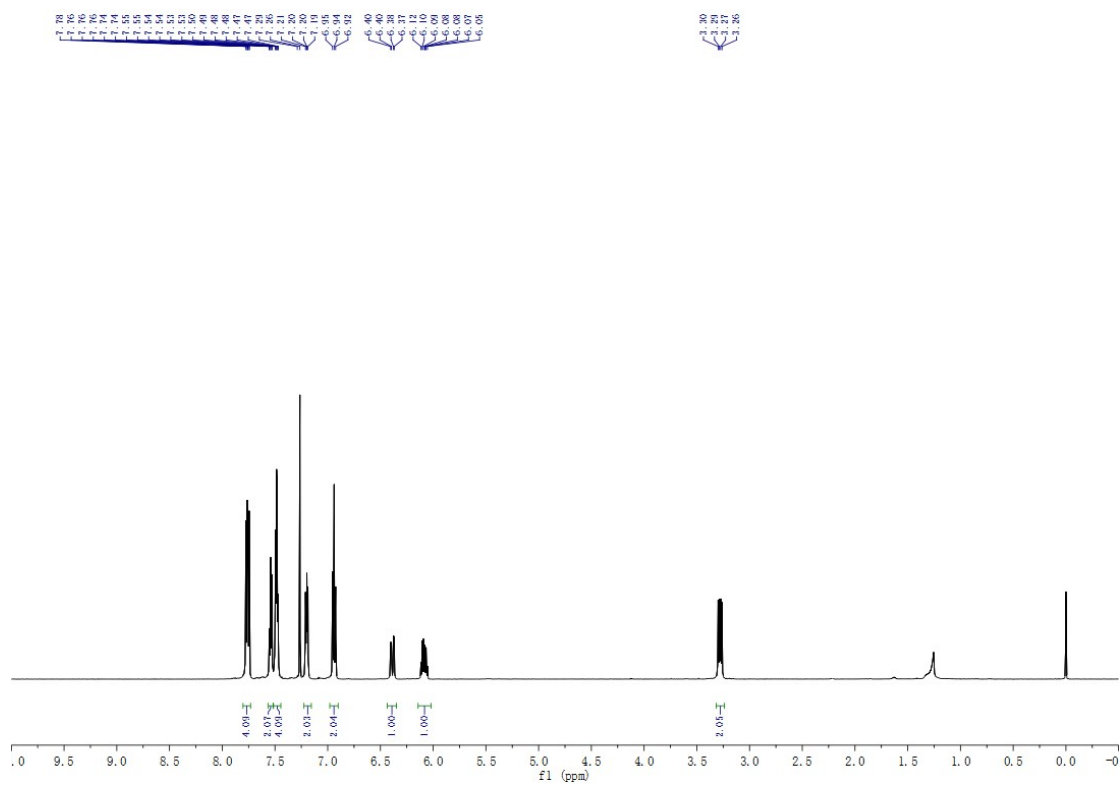

$^{13}\text{C}$  NMR (151 MHz,  $\text{CDCl}_3$ )

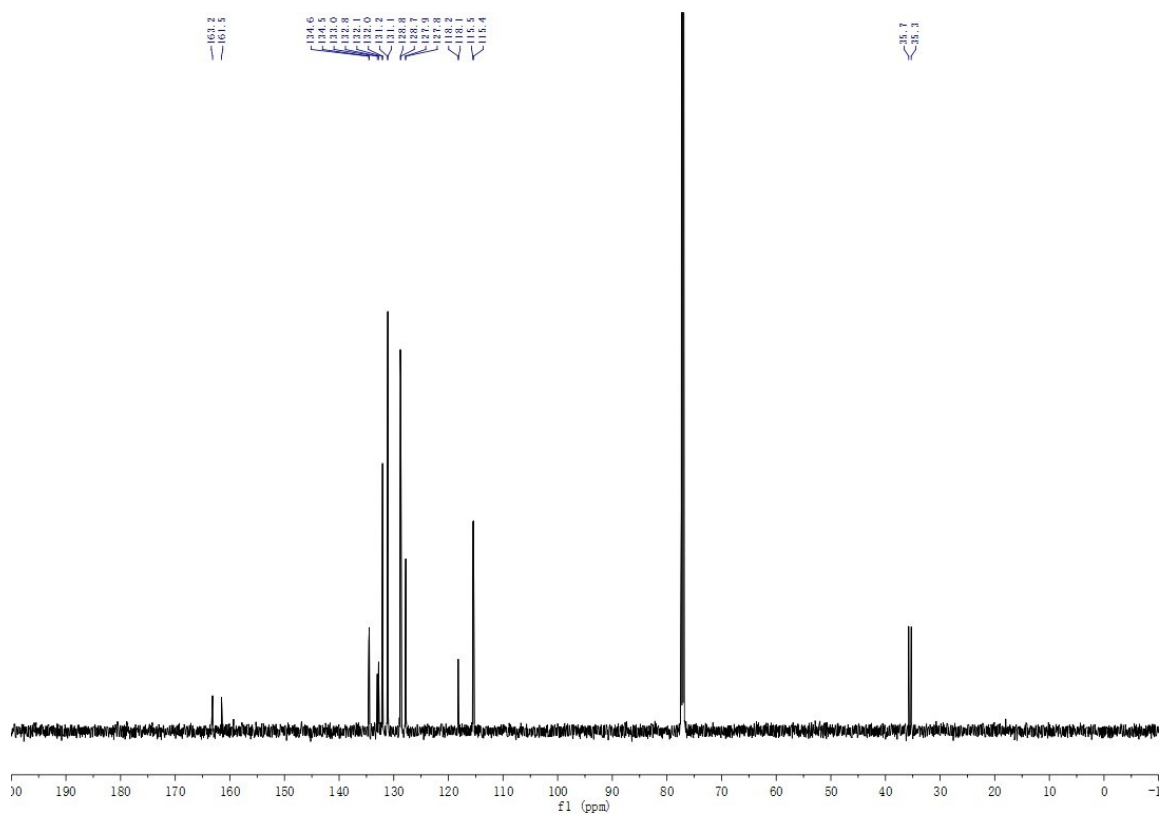

$^{31}\text{P}$  NMR (243 MHz,  $\text{CDCl}_3$ )

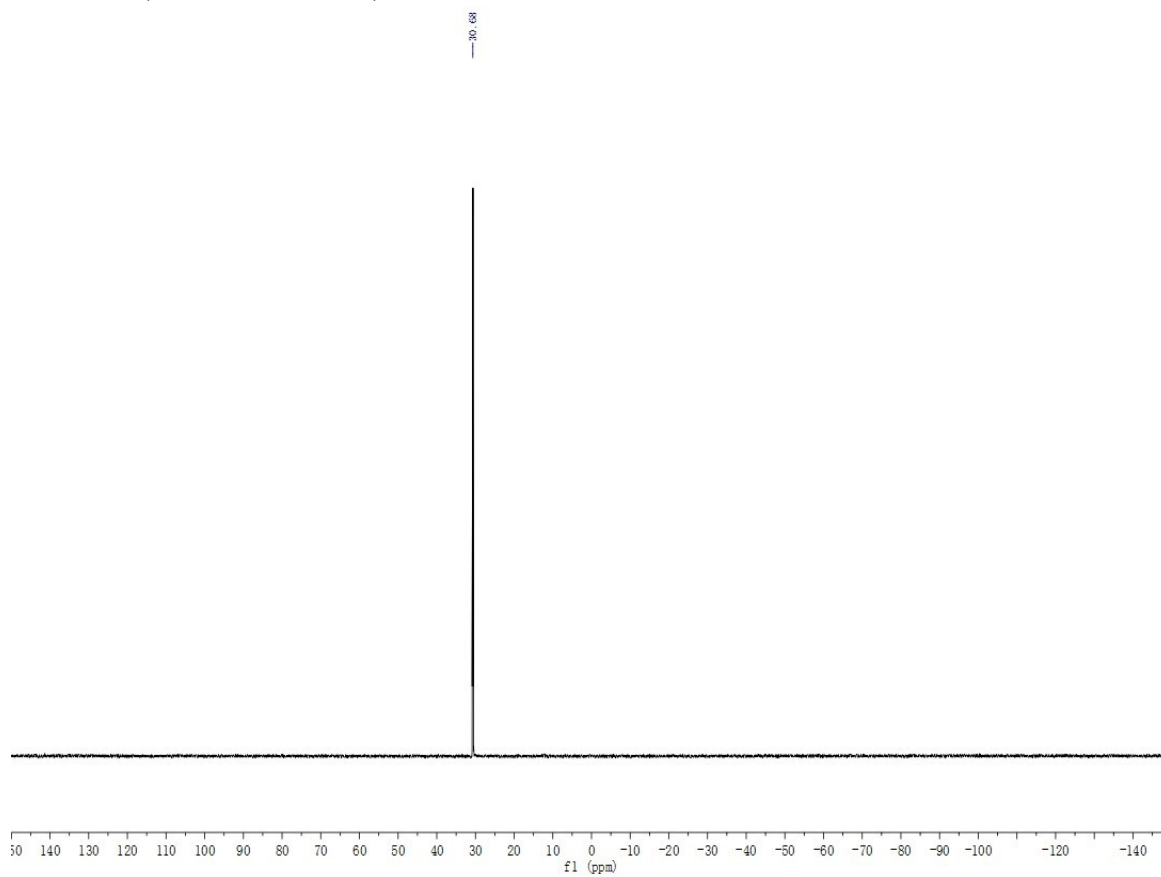

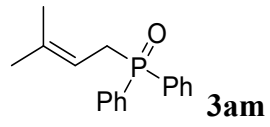

$^1\text{H}$  NMR (600 MHz,  $\text{CDCl}_3$ )

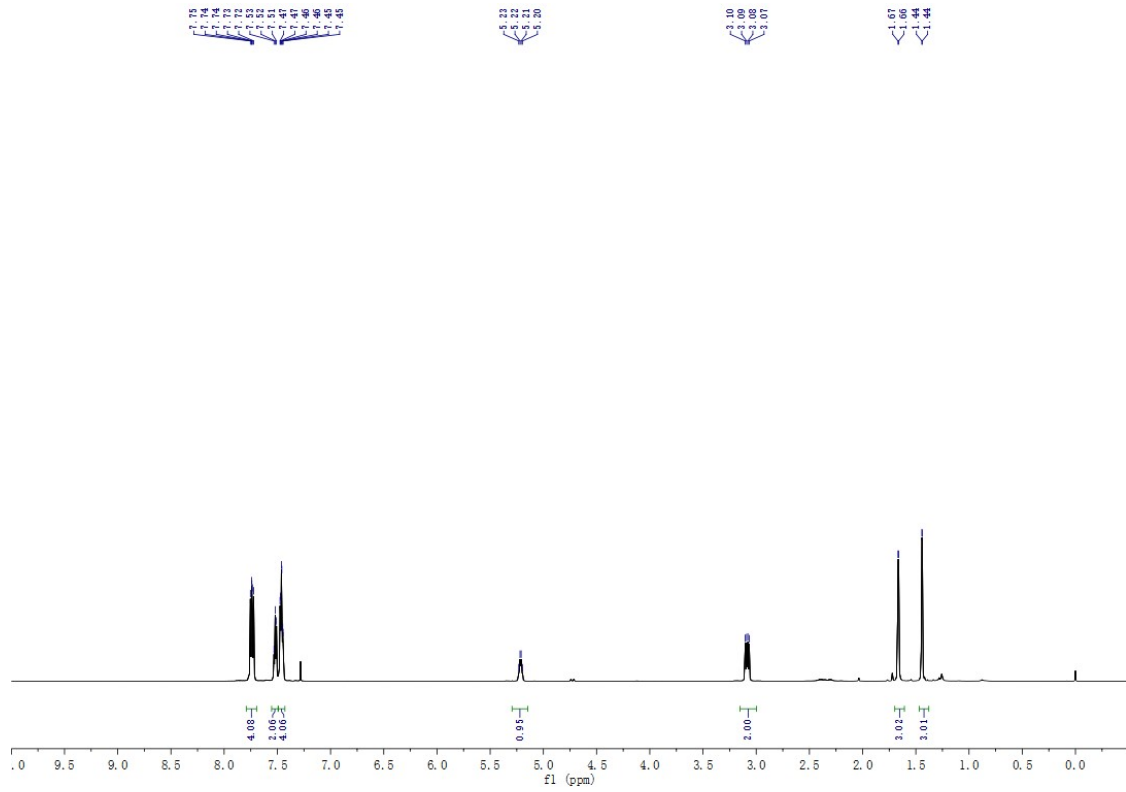

$^{13}\text{C}$  NMR (151 MHz,  $\text{CDCl}_3$ )

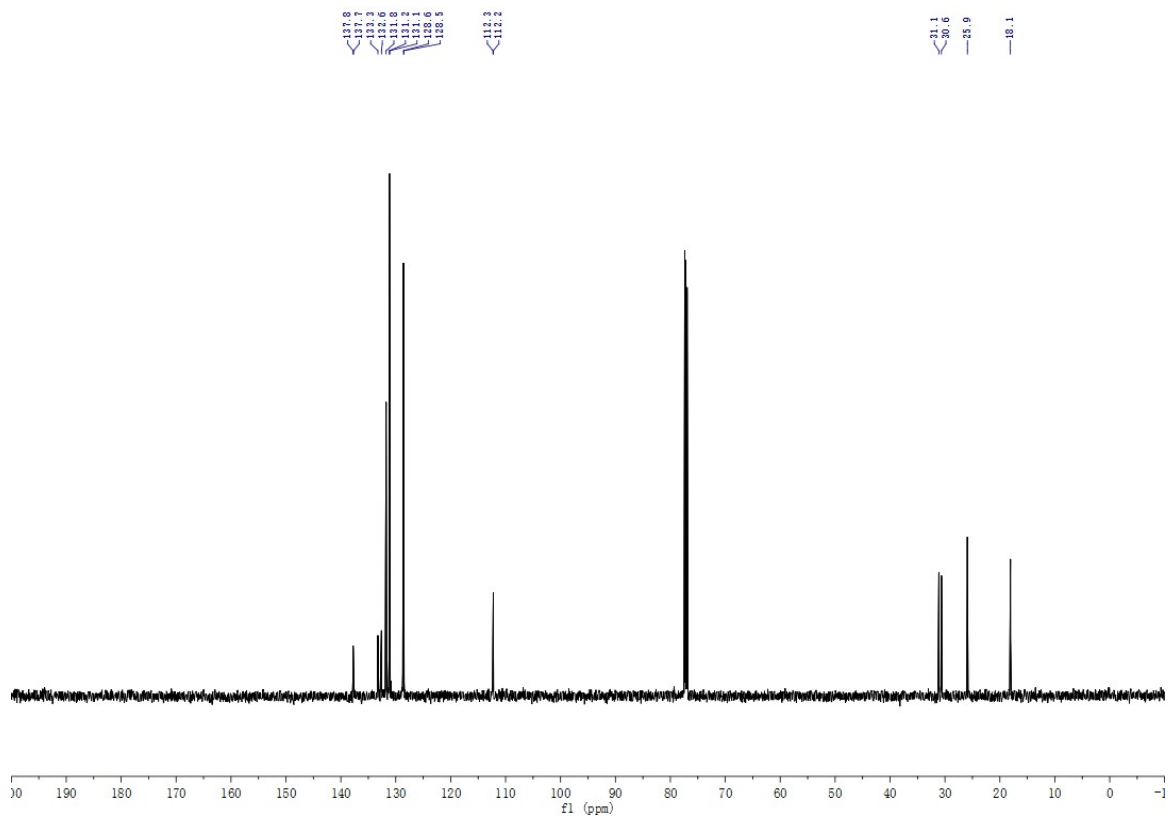





$^{13}\text{C}$  NMR (151 MHz,  $\text{CDCl}_3$ )

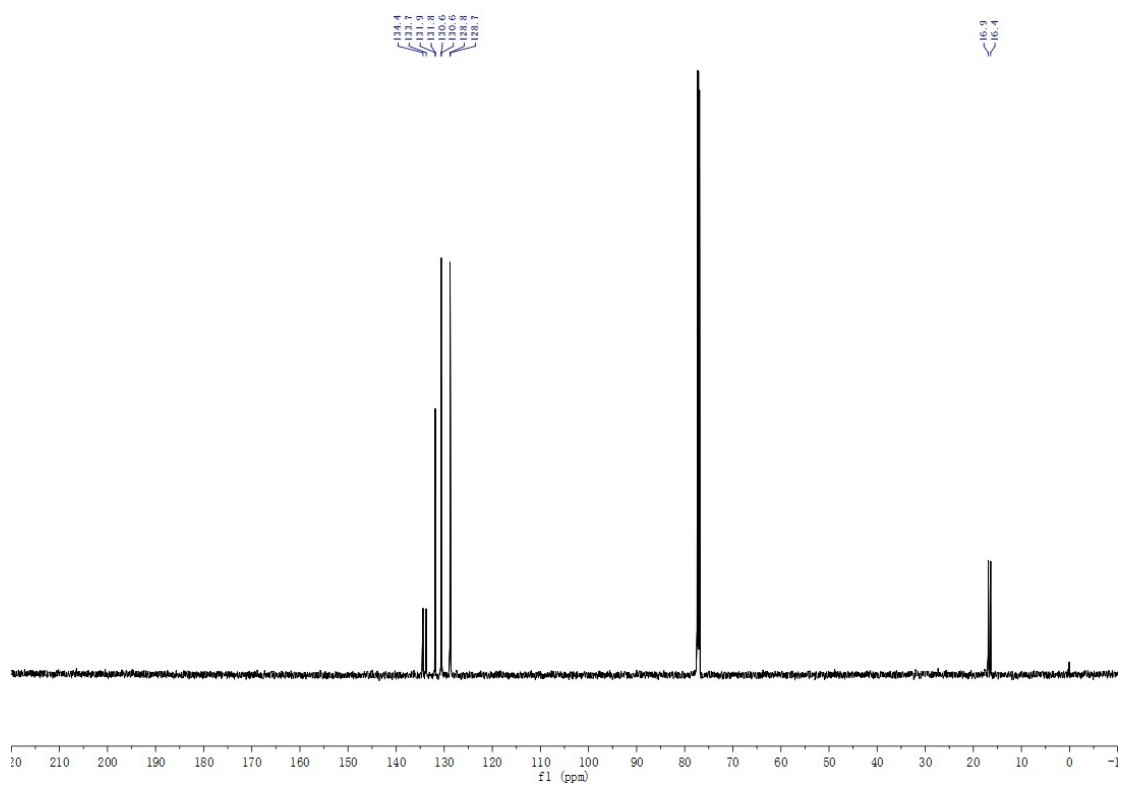

$^{31}\text{P}$  NMR (243 MHz,  $\text{CDCl}_3$ )

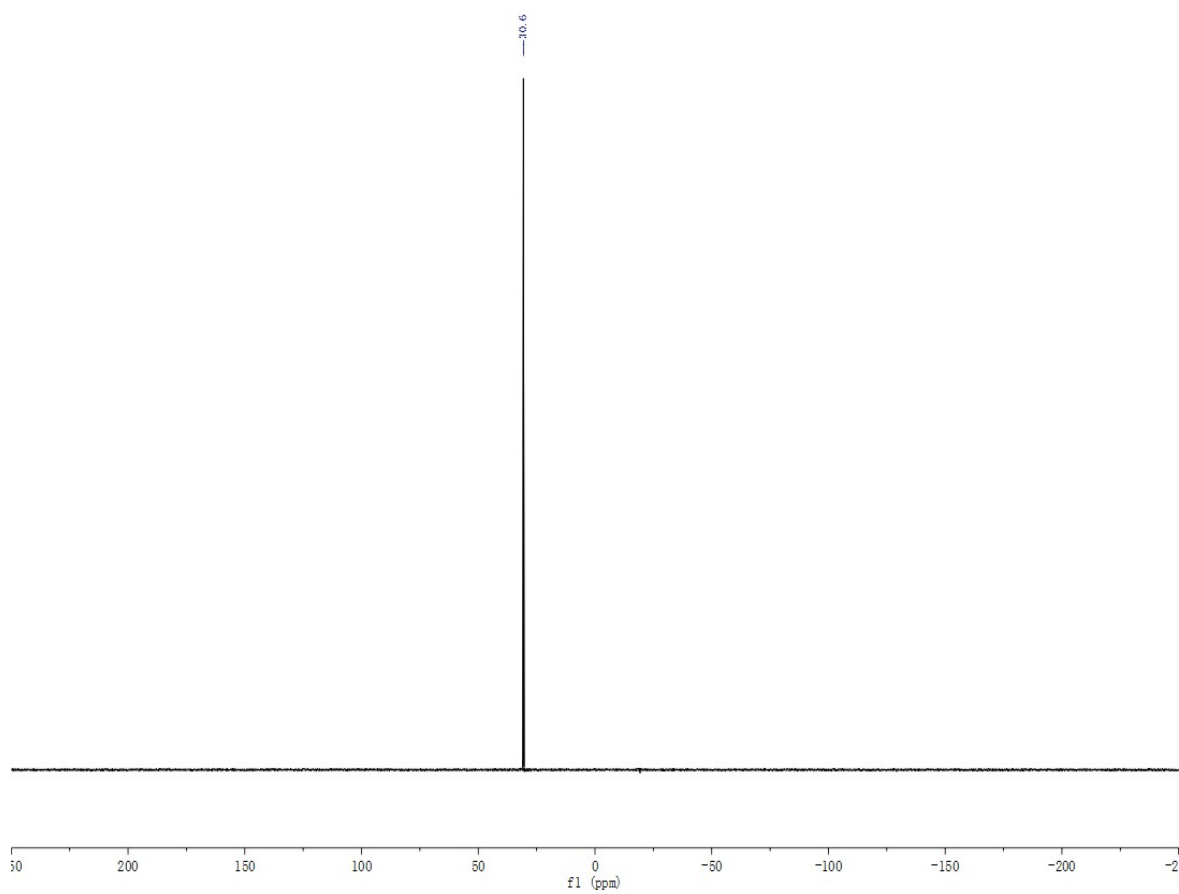

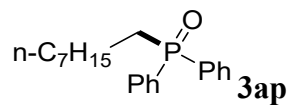

$^1\text{H}$  NMR (600 MHz,  $\text{CDCl}_3$ )

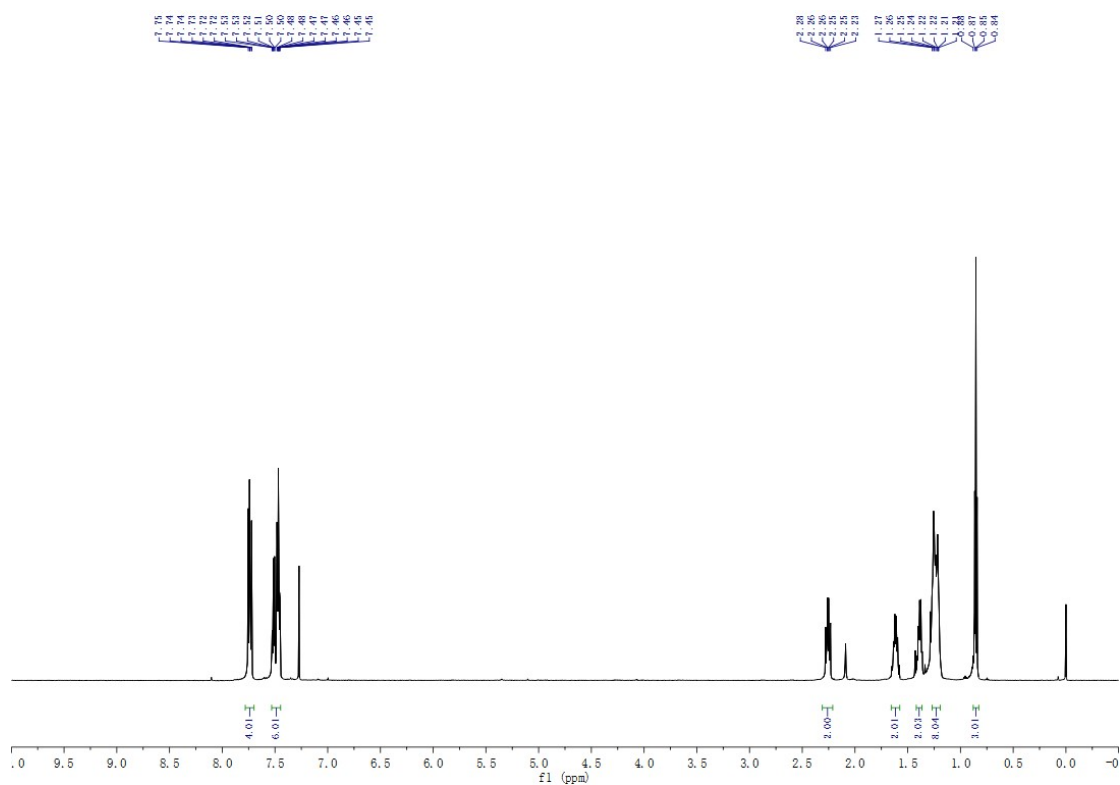

$^{13}\text{C}$  NMR (151 MHz,  $\text{CDCl}_3$ )

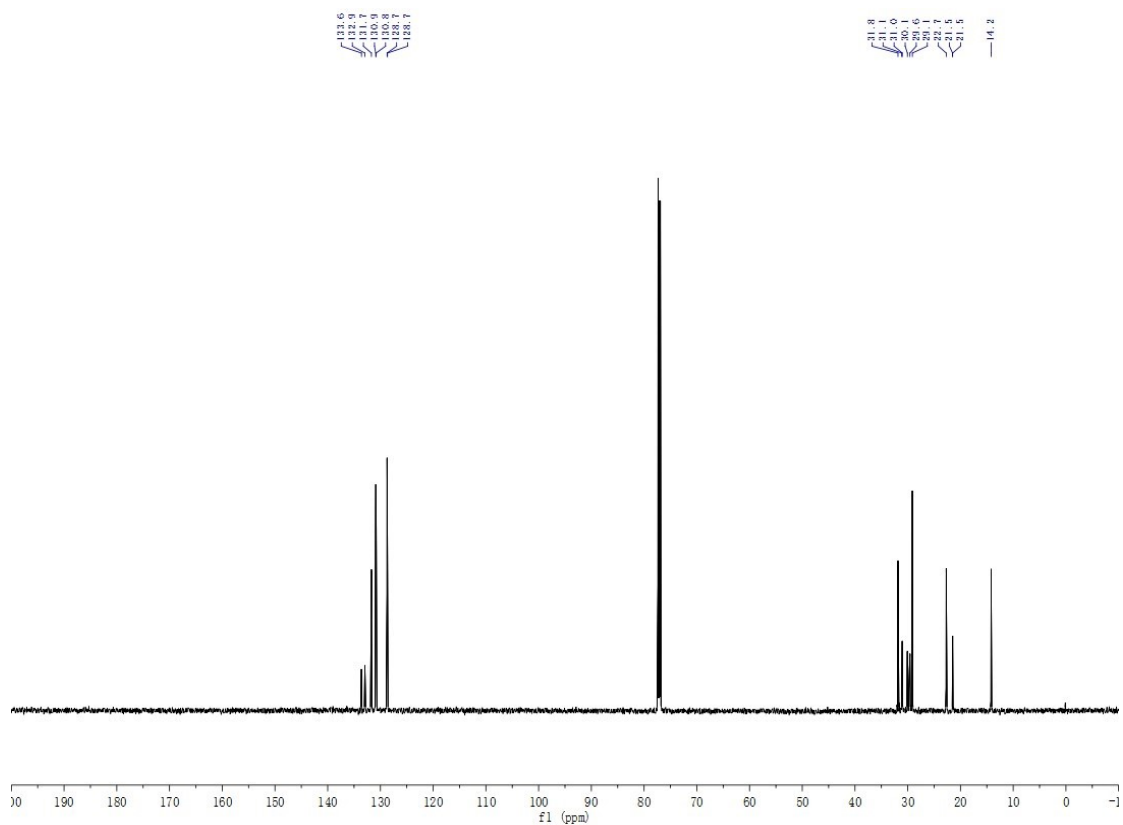

$^{31}\text{P}$  NMR (243 MHz,  $\text{CDCl}_3$ )

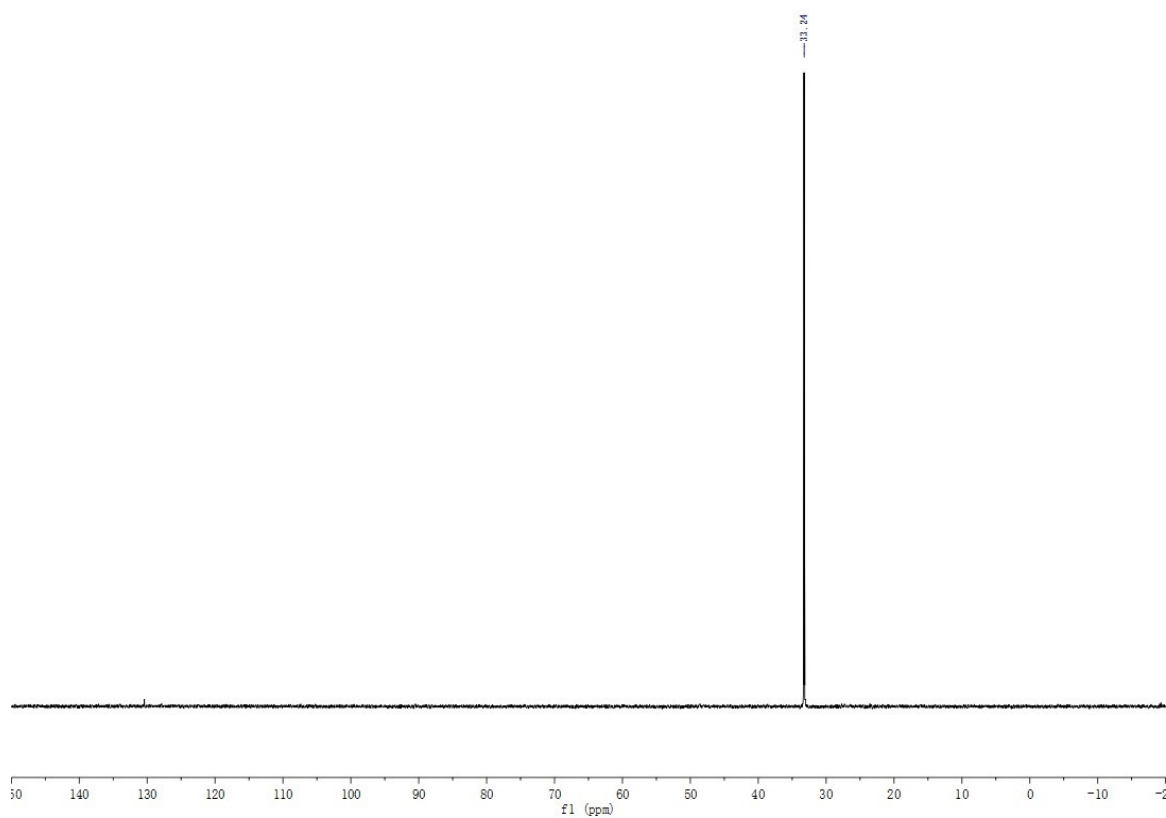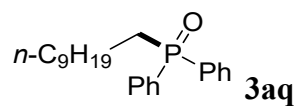

$^1\text{H}$  NMR (600 MHz,  $\text{CDCl}_3$ )

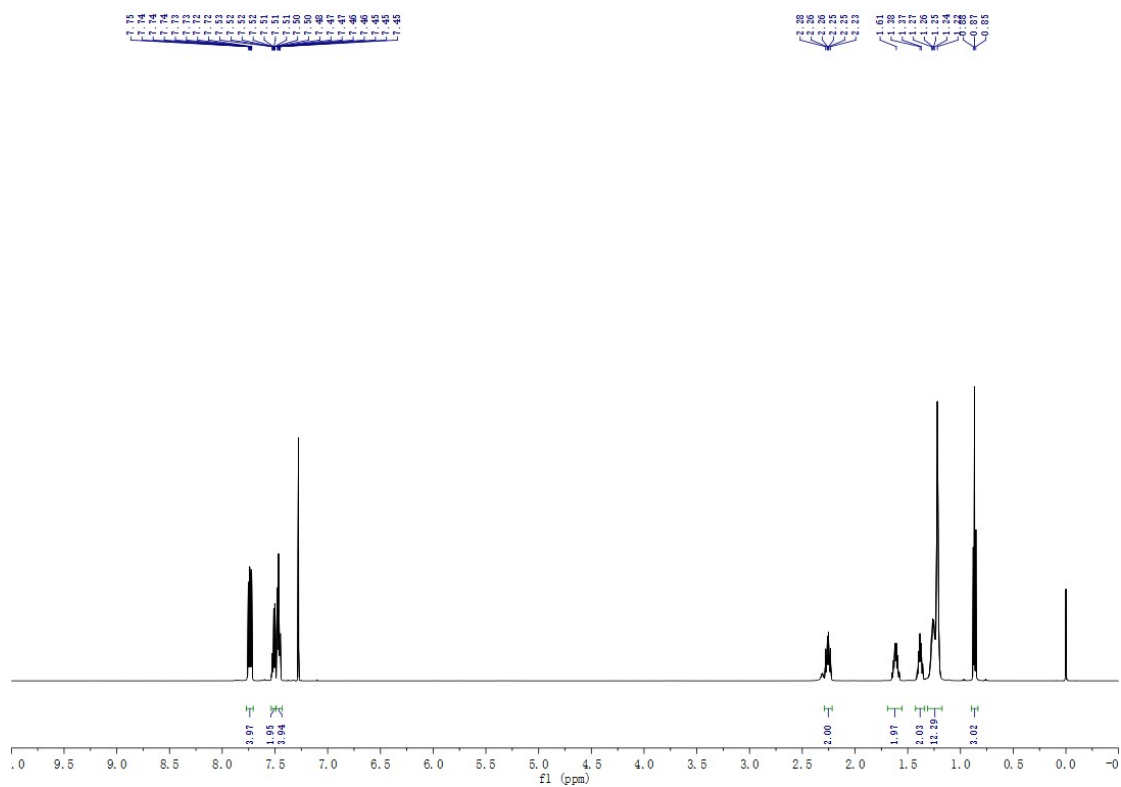

$^{13}\text{C}$  NMR (151 MHz,  $\text{CDCl}_3$ )

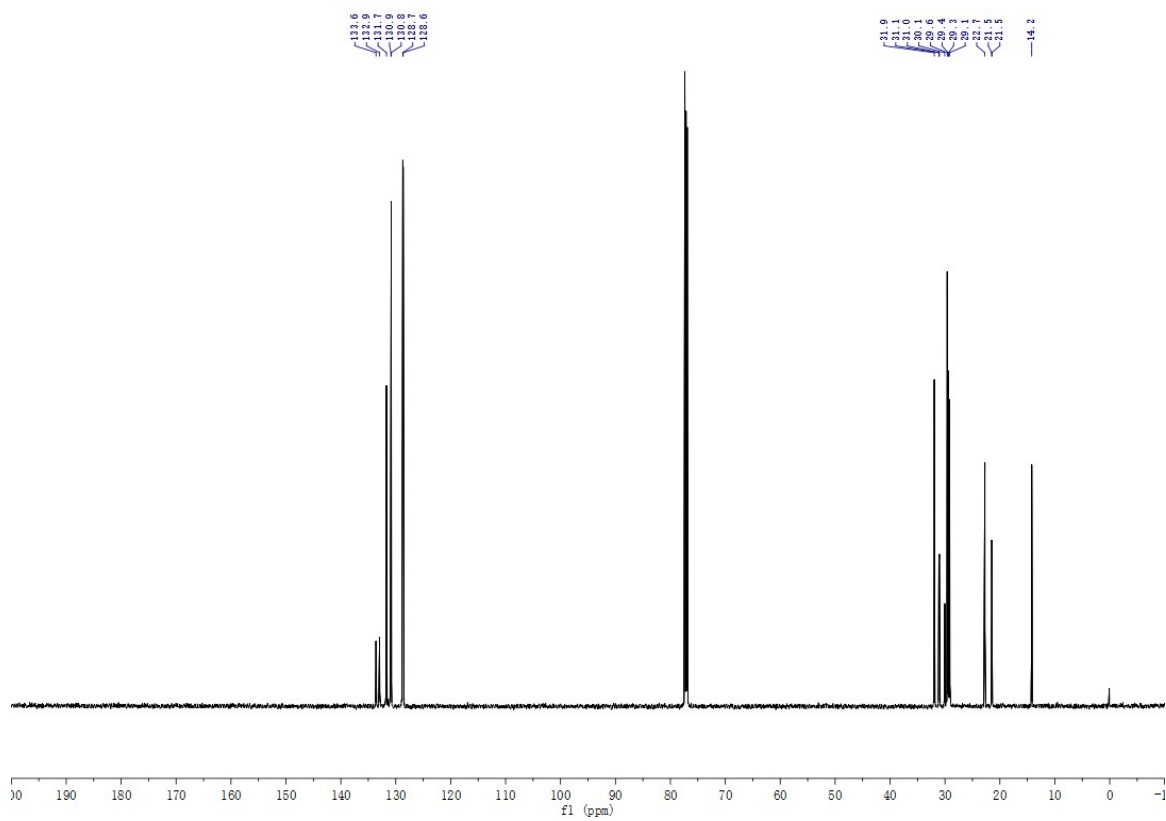

$^{31}\text{P}$  NMR (243 MHz,  $\text{CDCl}_3$ )

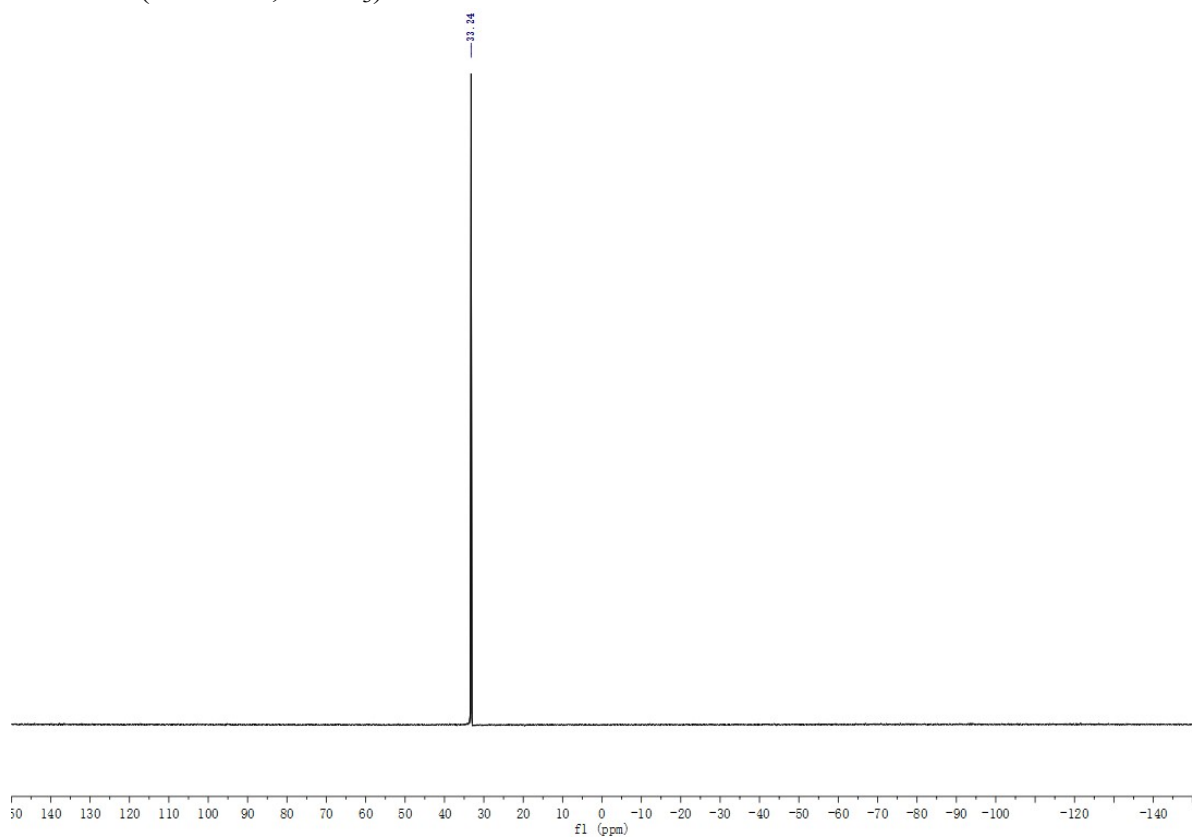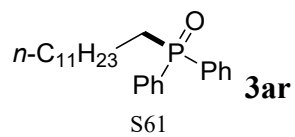

$^1\text{H}$  NMR (600 MHz,  $\text{CDCl}_3$ )

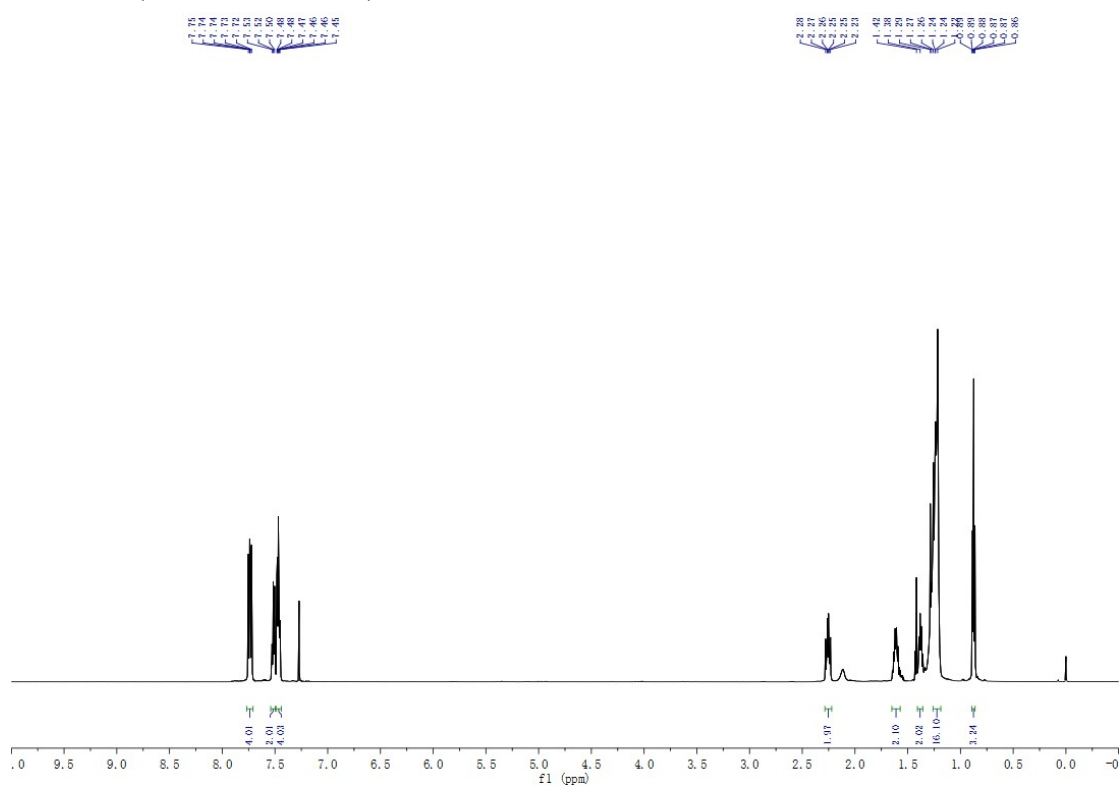

$^{13}\text{C}$  NMR (151 MHz,  $\text{CDCl}_3$ )

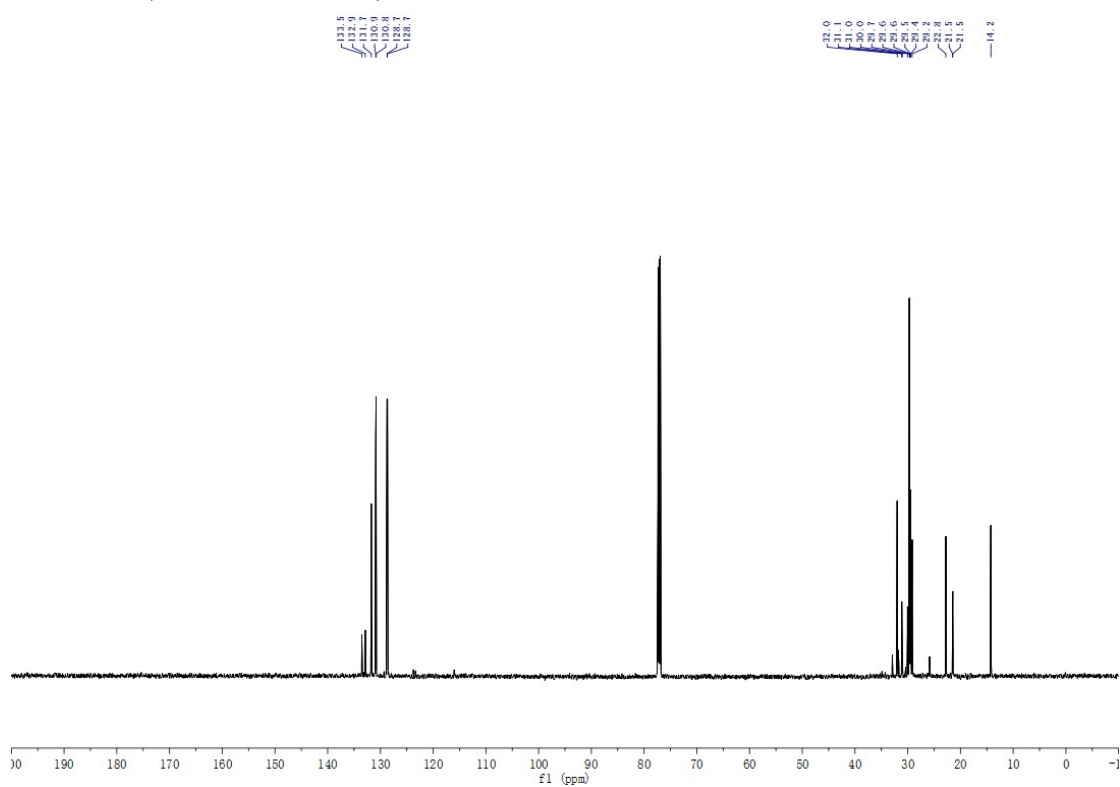

$^{31}\text{P}$  NMR (243 MHz,  $\text{CDCl}_3$ )

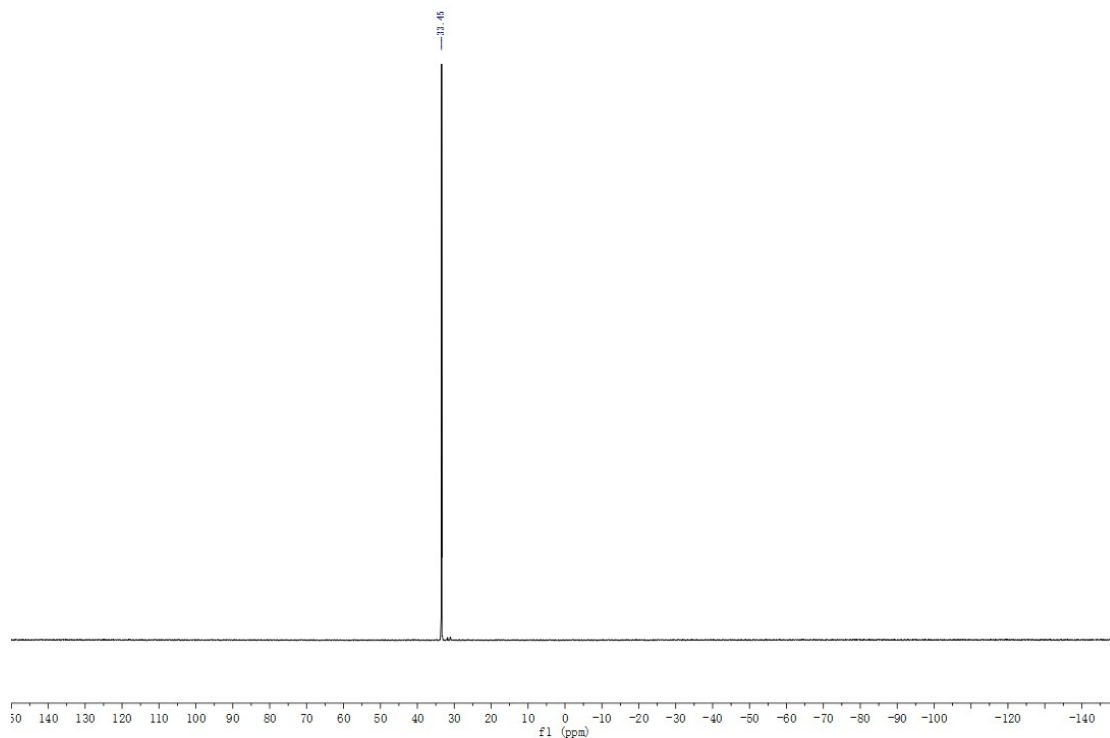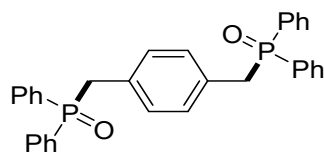

**3au**

<sup>1</sup>H NMR (600 MHz, CDCl<sub>3</sub>)

7.65  
7.62  
7.62  
7.49  
7.46  
7.41  
7.38  
6.33

3.56  
3.54

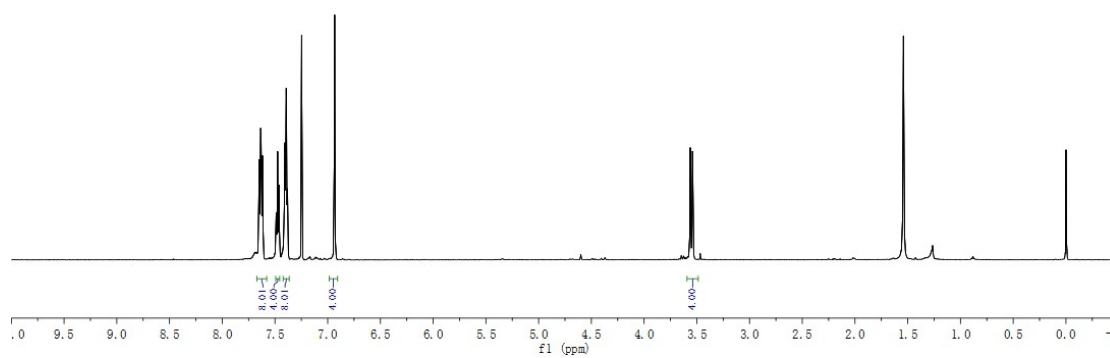

<sup>13</sup>C NMR (151 MHz, CDCl<sub>3</sub>)

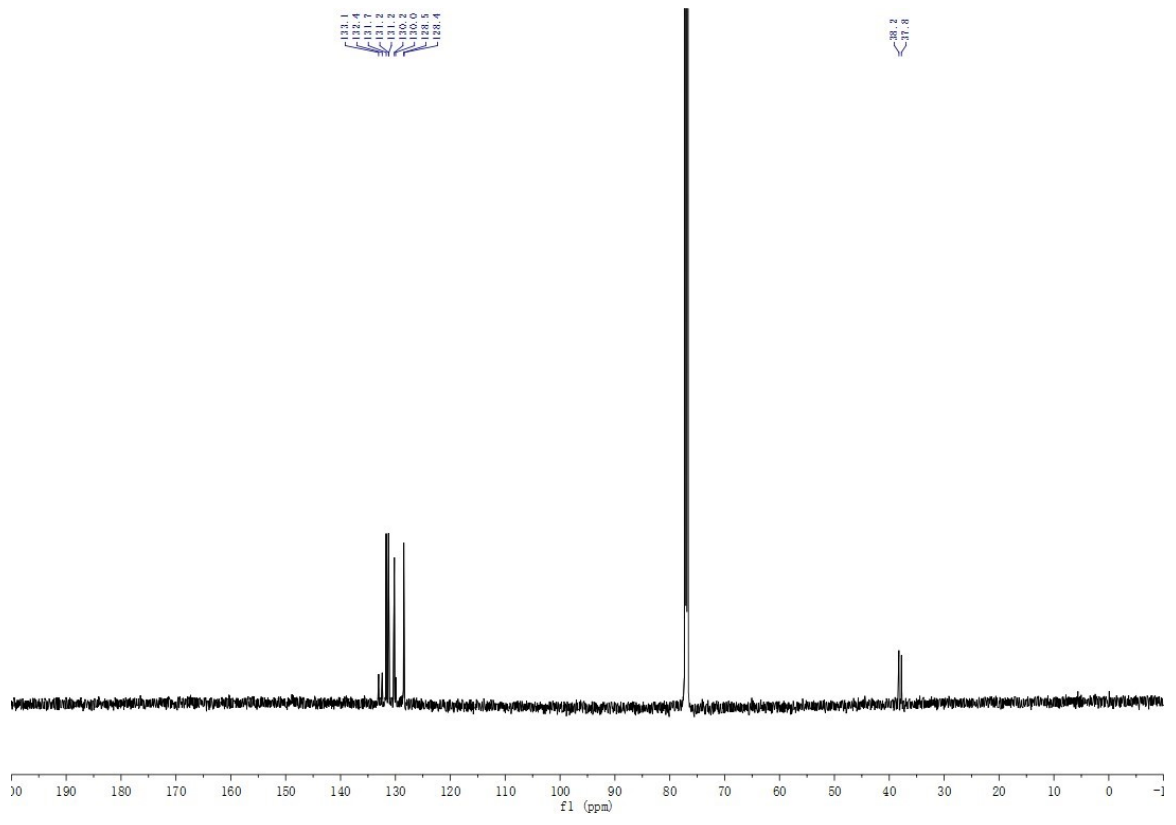

$^{31}\text{P}$  NMR (243 MHz,  $\text{CDCl}_3$ )

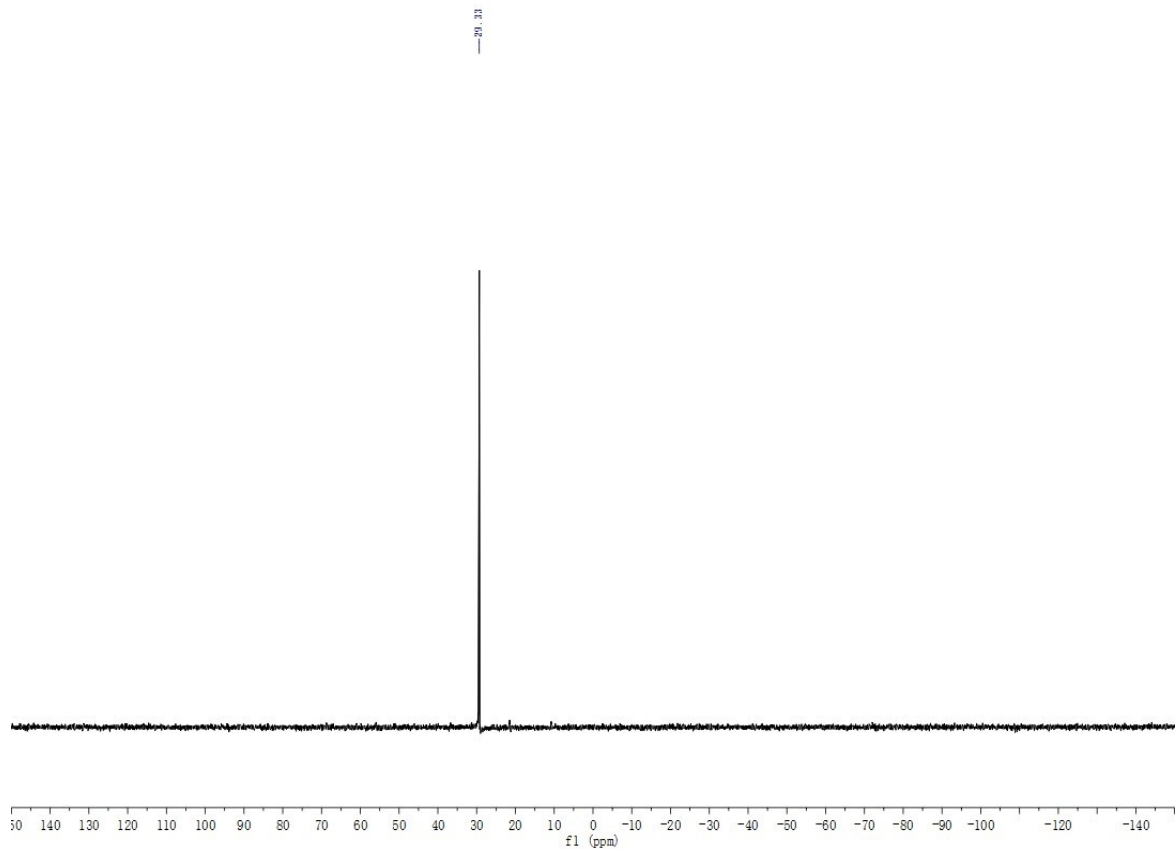



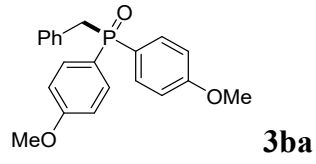

<sup>1</sup>H NMR (600 MHz, CDCl<sub>3</sub>)

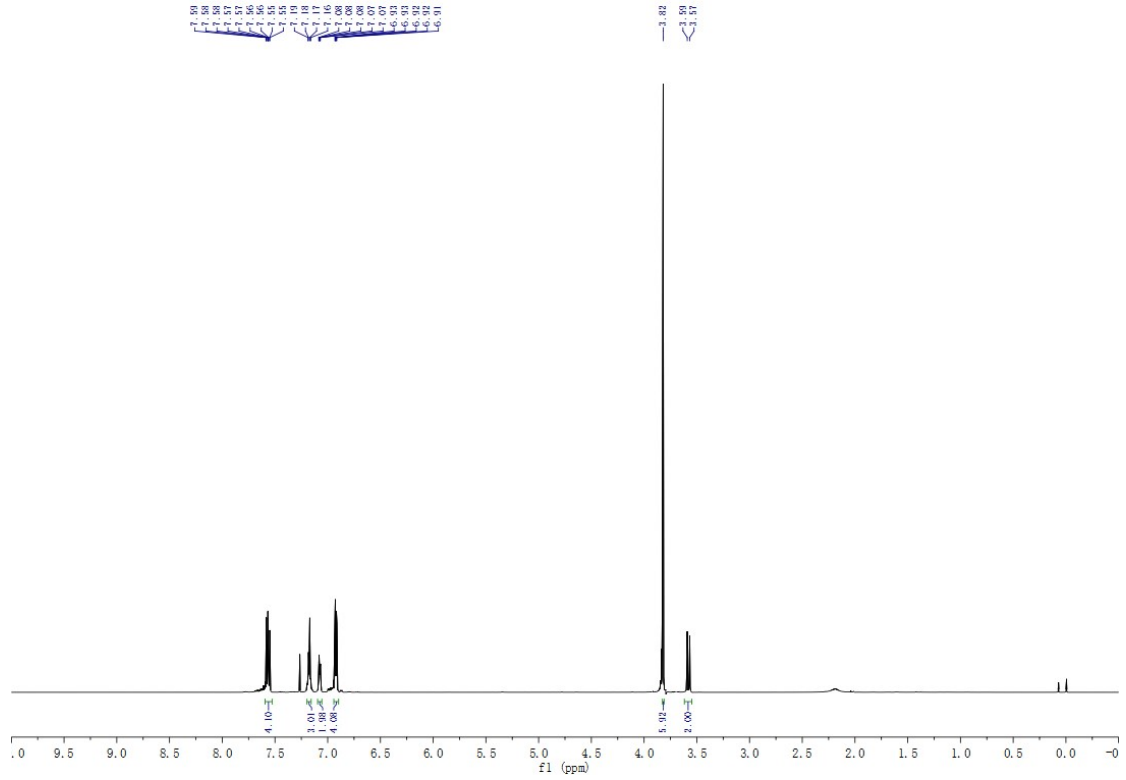

<sup>13</sup>C NMR (151 MHz, CDCl<sub>3</sub>)

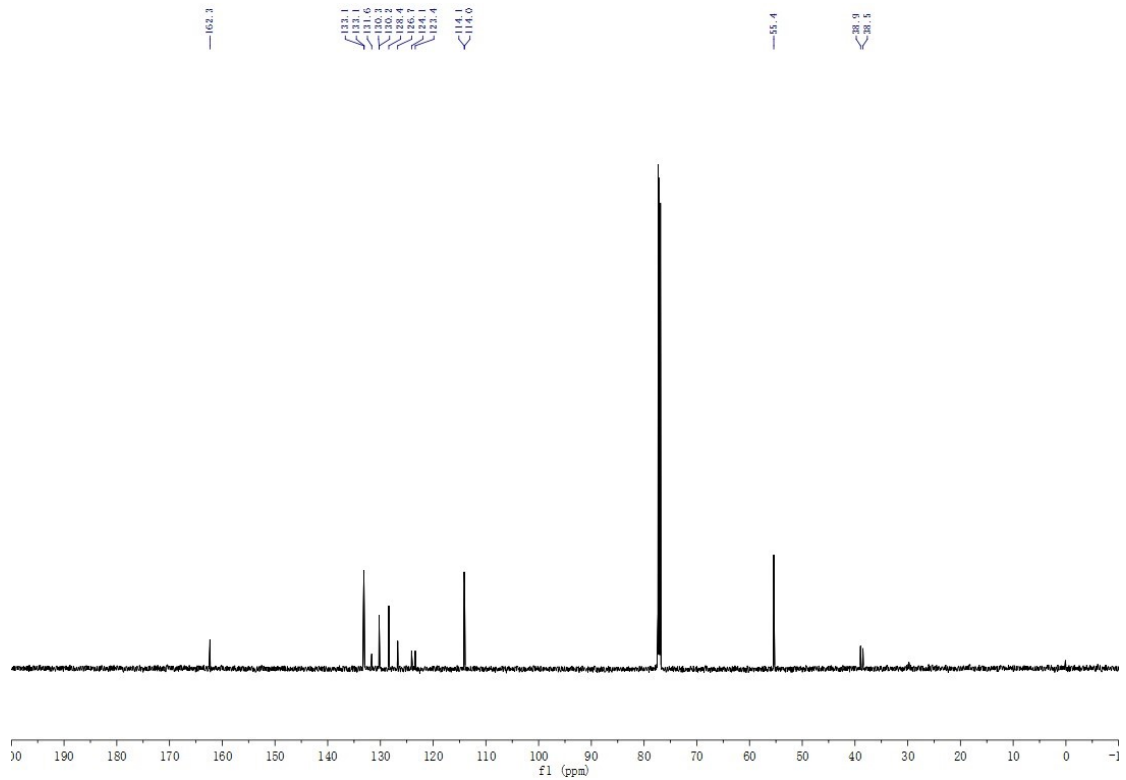

$^{31}\text{P}$  NMR (243 MHz,  $\text{CDCl}_3$ )

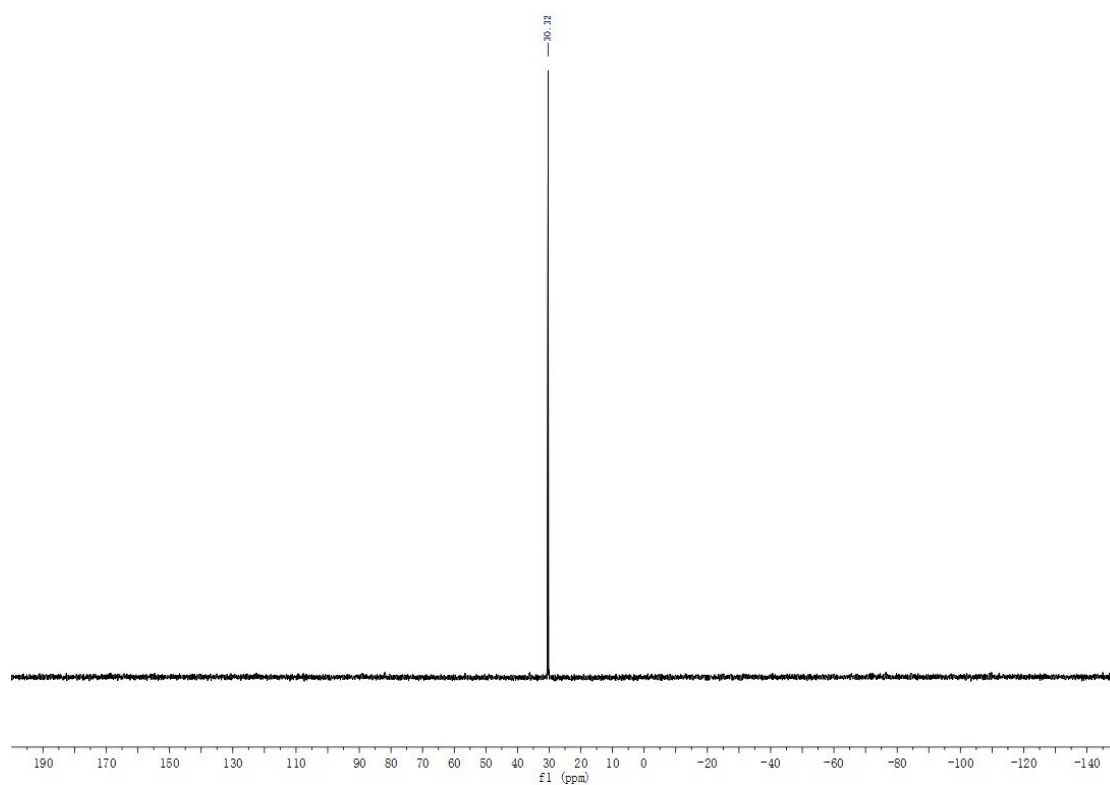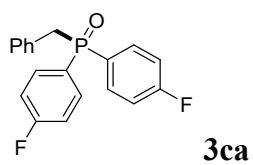

$^1\text{H}$  NMR (600 MHz,  $\text{CDCl}_3$ )

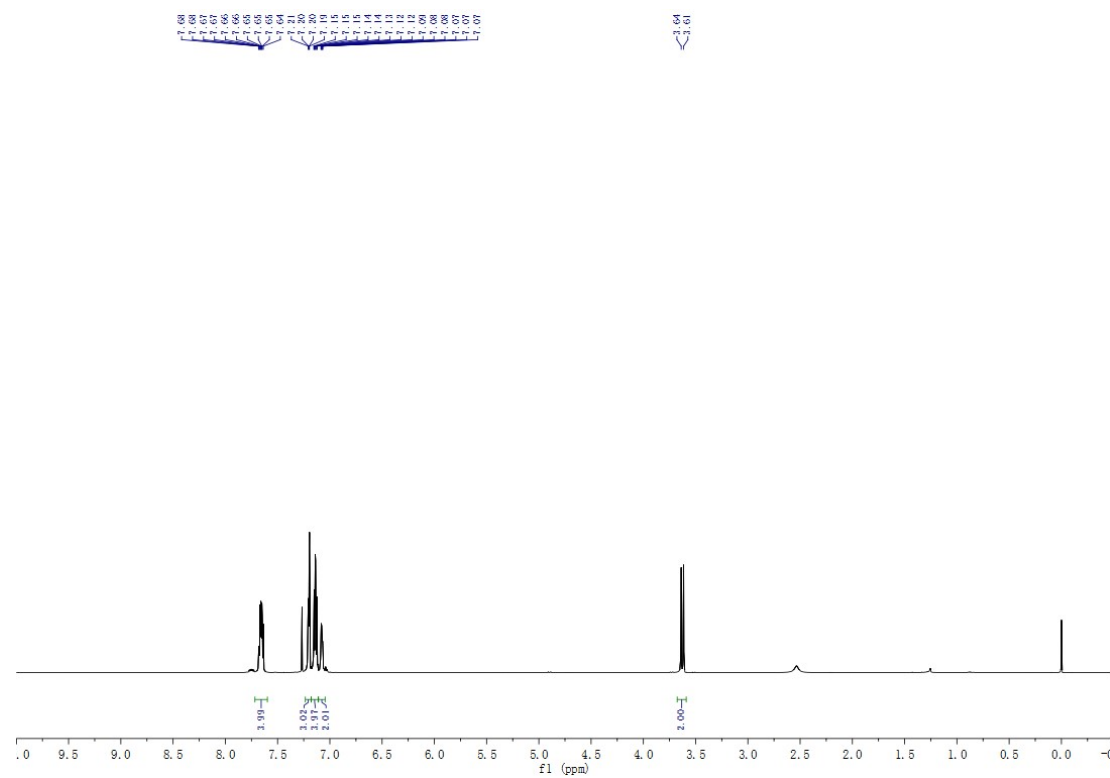

$^{13}\text{C}$  NMR (151 MHz,  $\text{CDCl}_3$ )

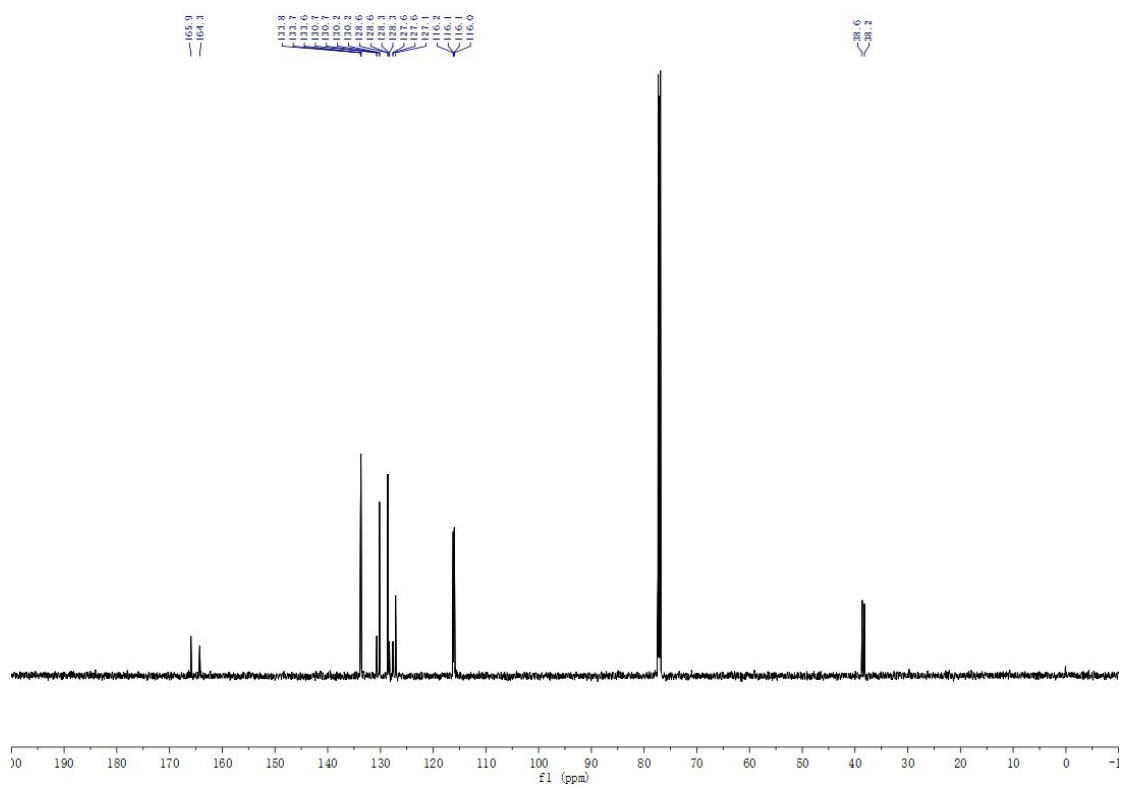

$^{31}\text{P}$  NMR (243 MHz,  $\text{CDCl}_3$ )

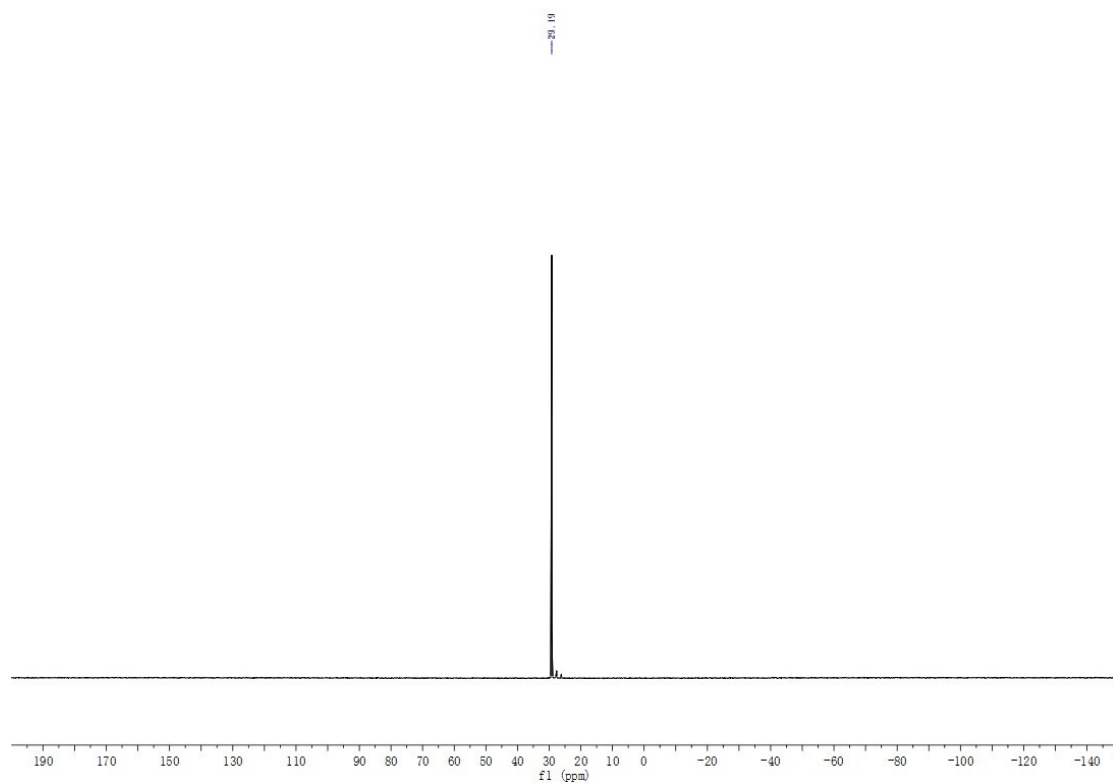

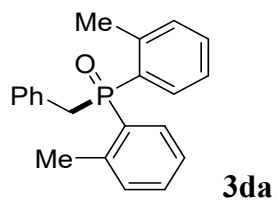

$^1\text{H}$  NMR (600 MHz,  $\text{CDCl}_3$ )

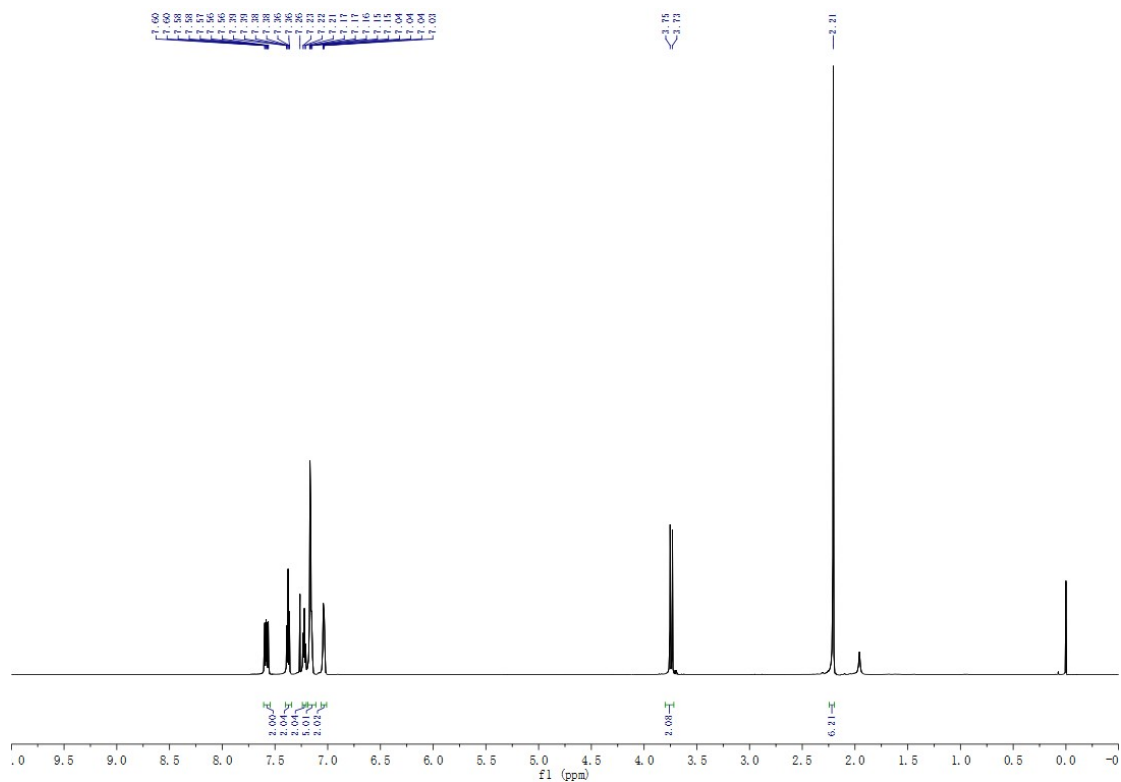

$^{13}\text{C}$  NMR (151 MHz,  $\text{CDCl}_3$ )

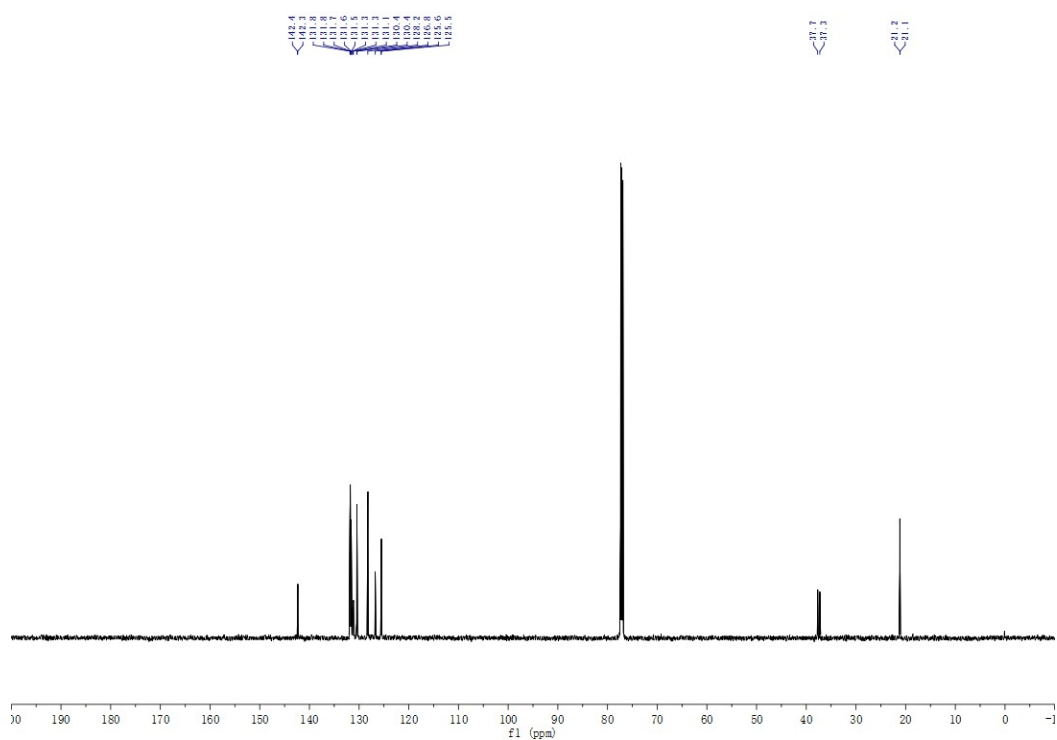

$^{31}\text{P}$  NMR (243 MHz,  $\text{CDCl}_3$ )

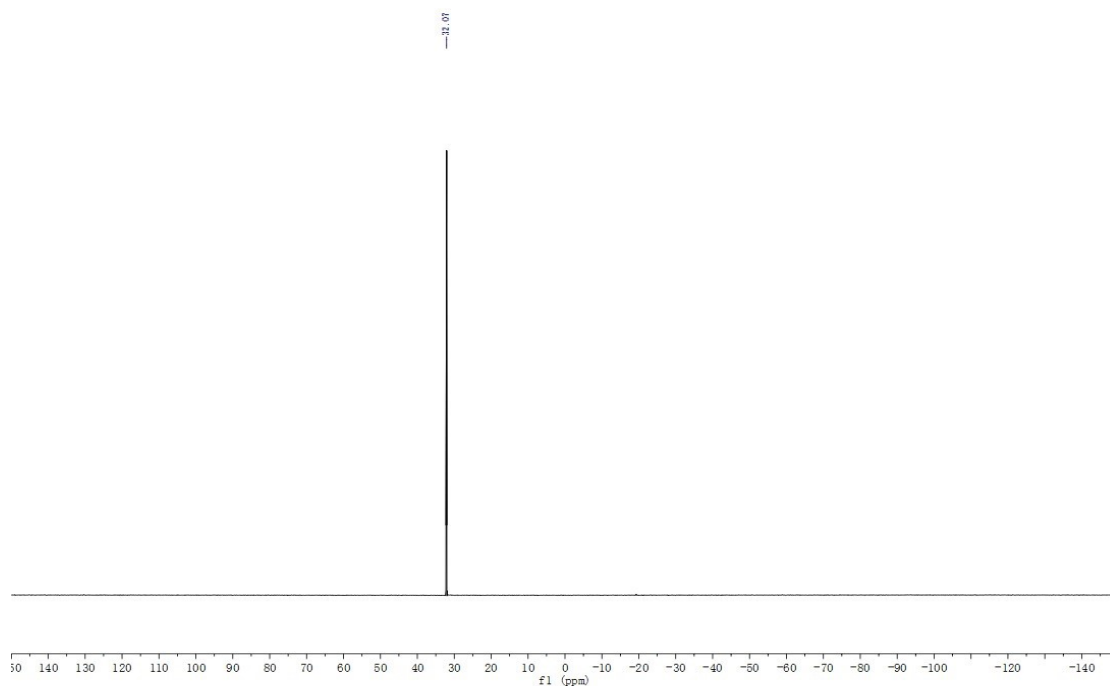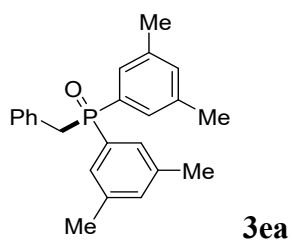

$^1\text{H}$  NMR (600 MHz,  $\text{CDCl}_3$ )

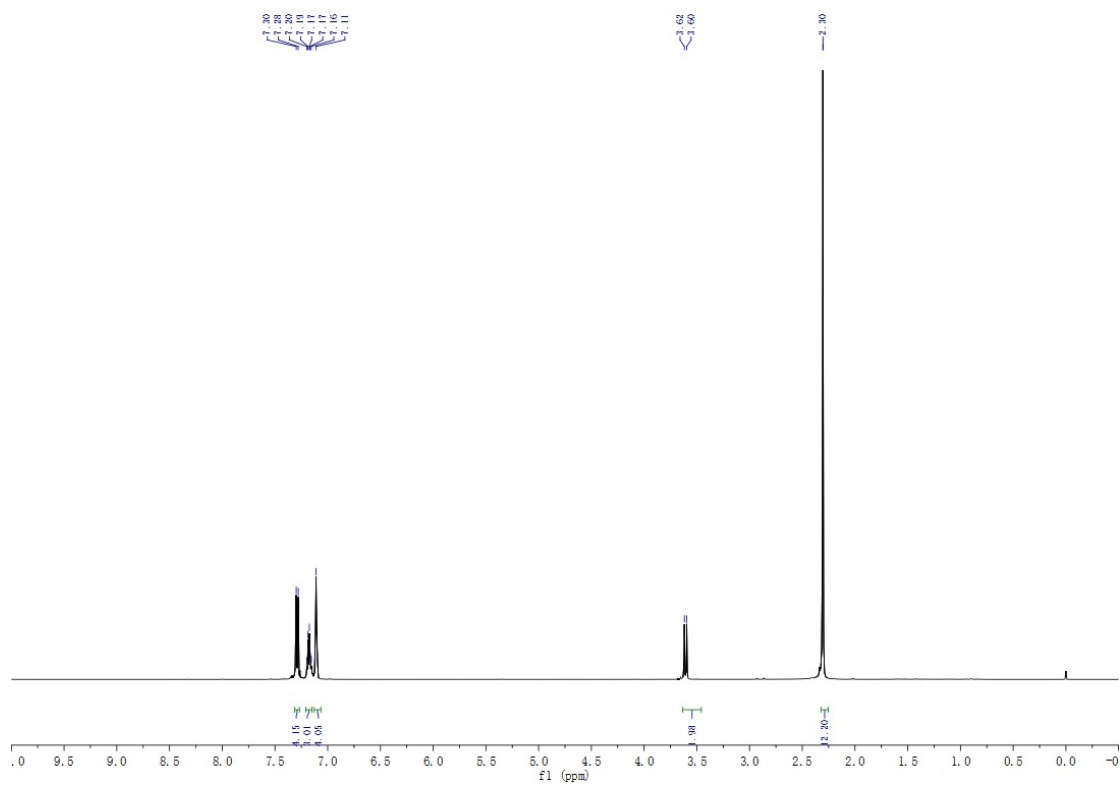

$^{13}\text{C}$  NMR (151 MHz,  $\text{CDCl}_3$ )

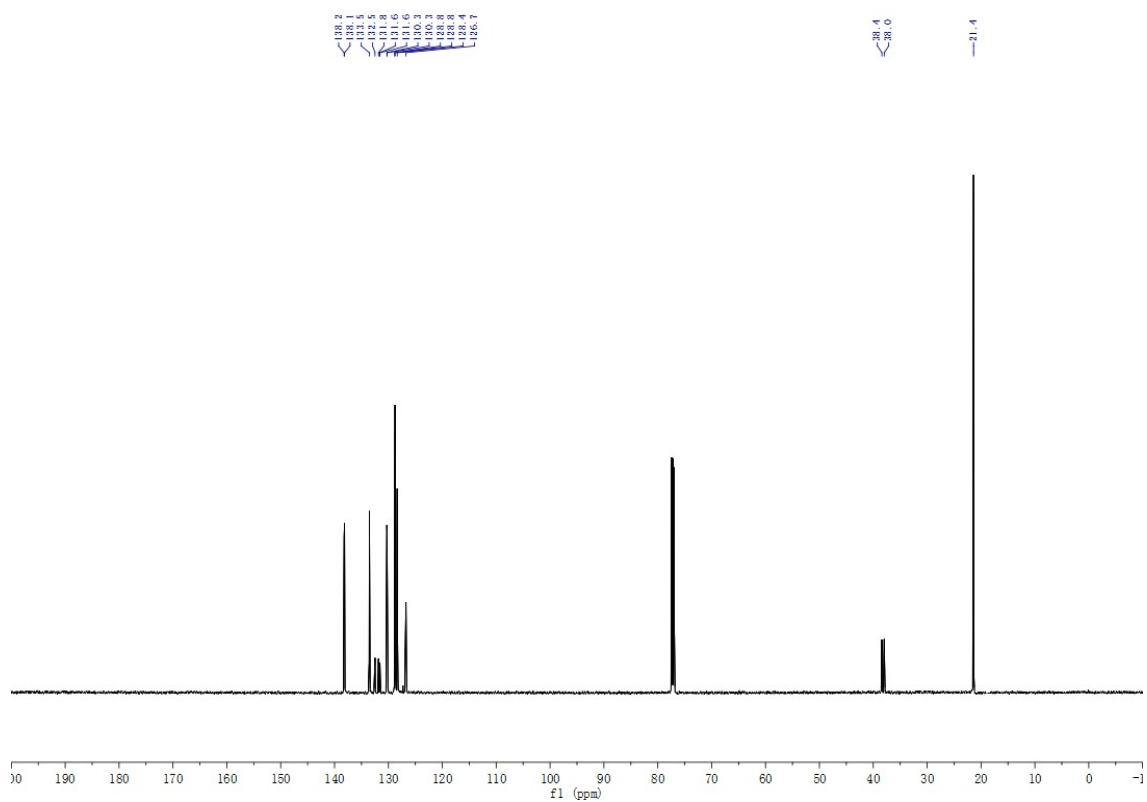

$^{31}\text{P}$  NMR (243 MHz,  $\text{CDCl}_3$ )

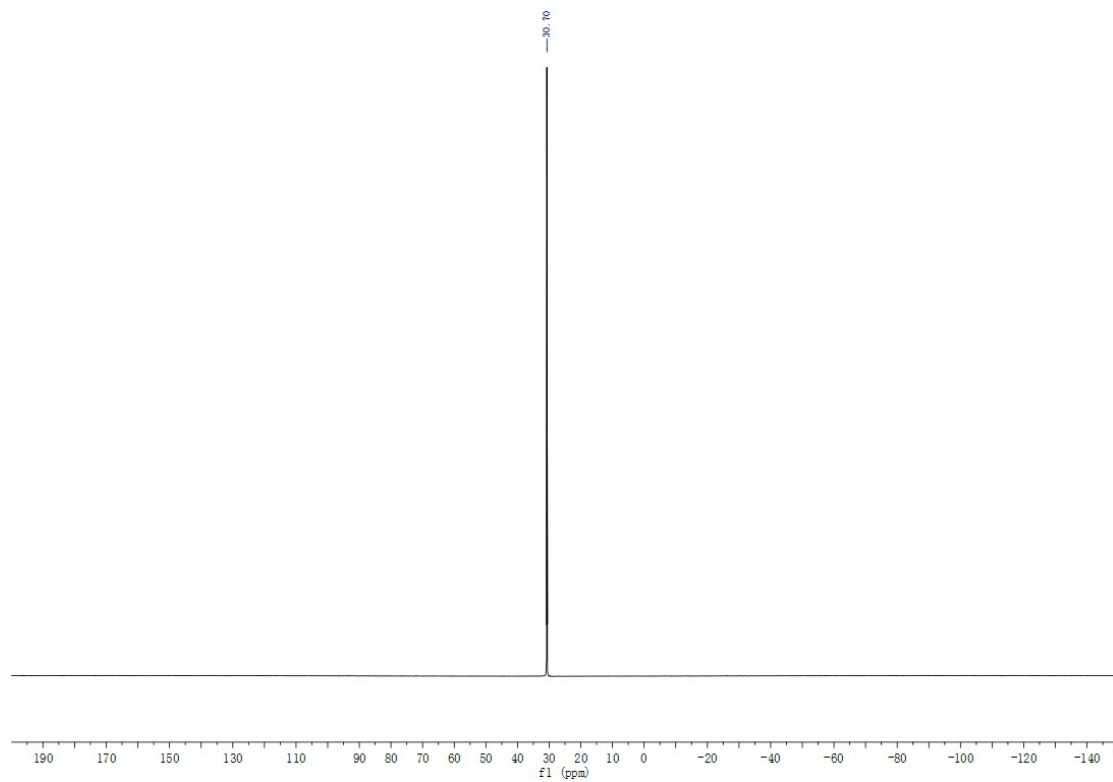







$^{13}\text{C}$  NMR (151 MHz,  $\text{CDCl}_3$ )

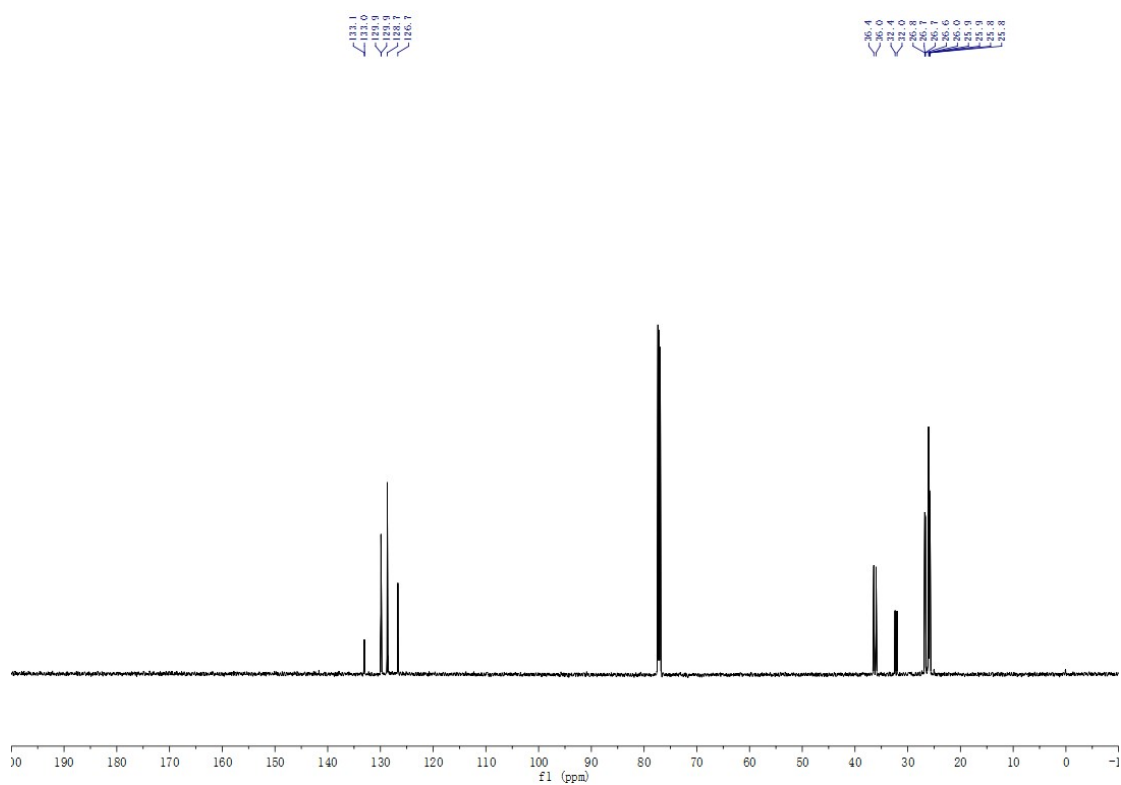

$^{31}\text{P}$  NMR (243 MHz,  $\text{CDCl}_3$ )

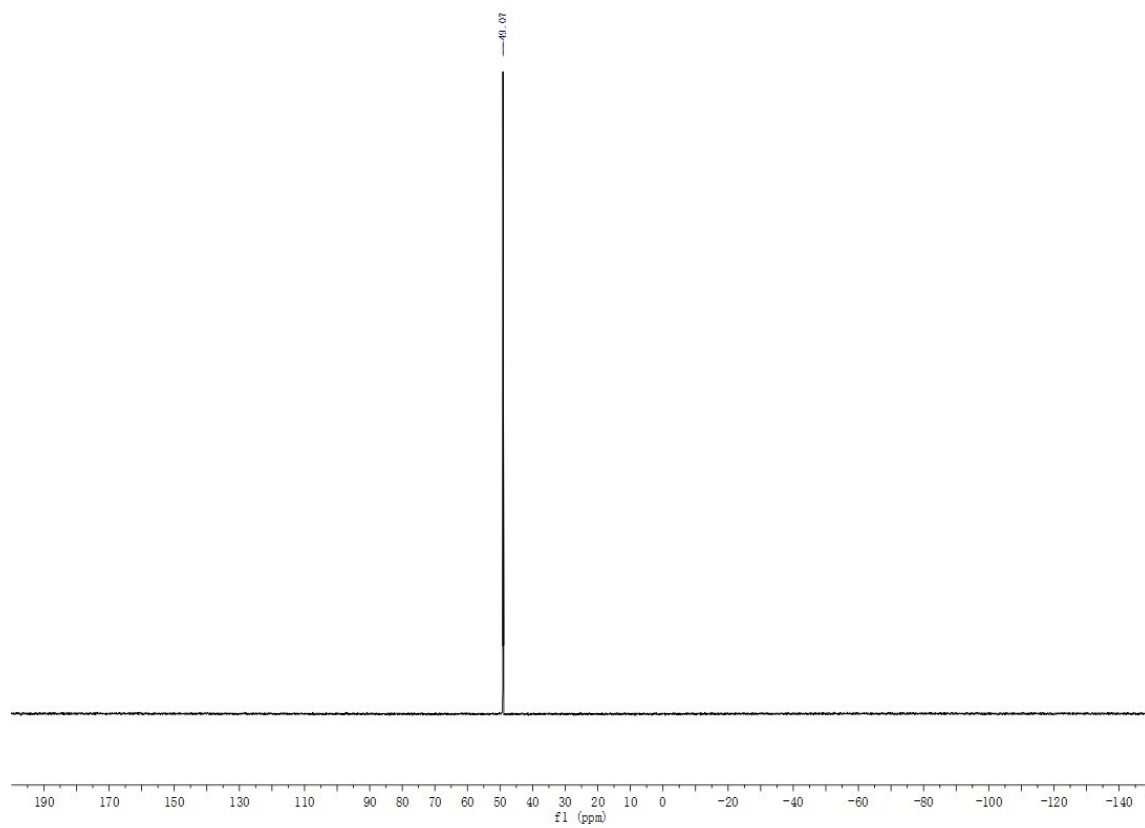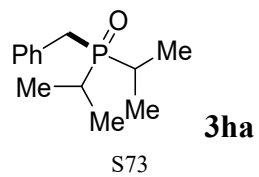



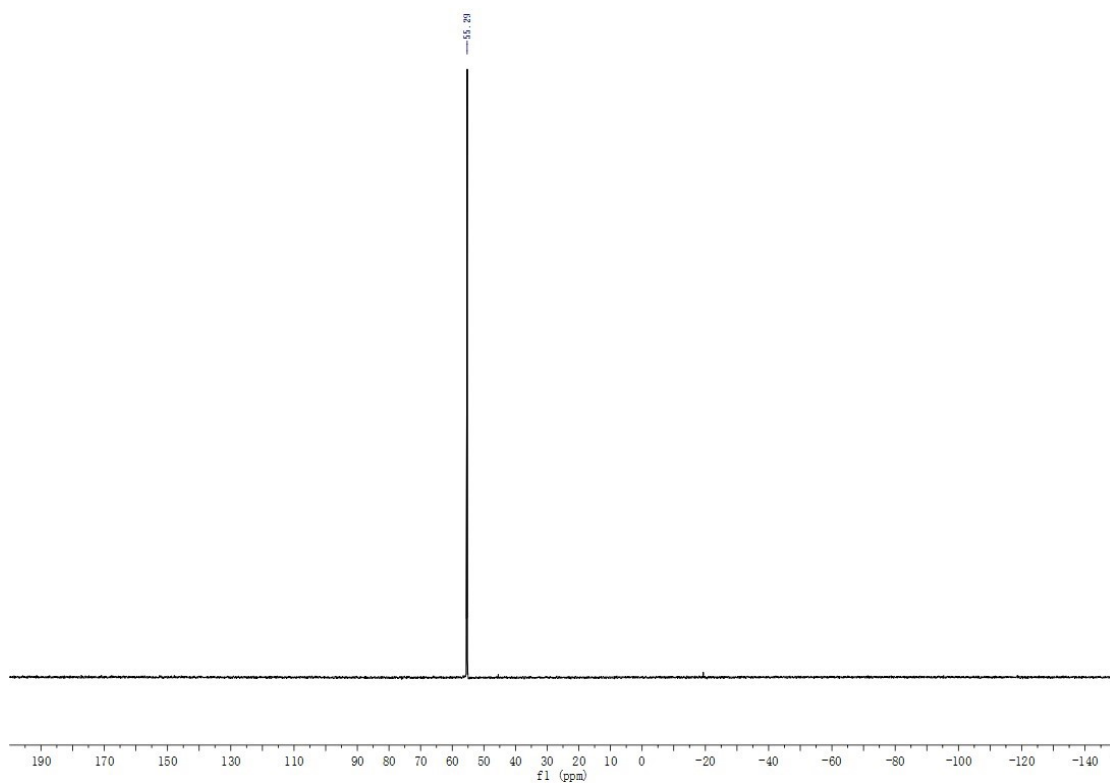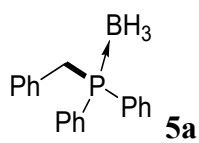

<sup>1</sup>H NMR (600 MHz, CDCl<sub>3</sub>)

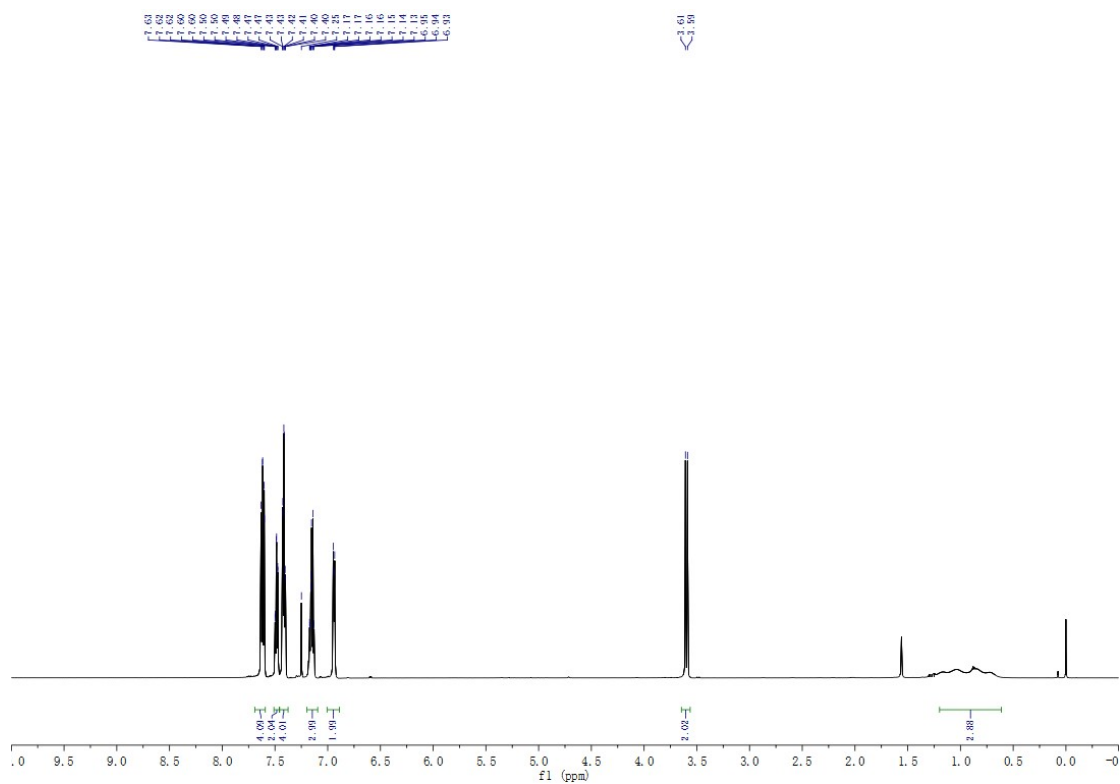

$^{13}\text{C}$  NMR (151 MHz,  $\text{CDCl}_3$ )

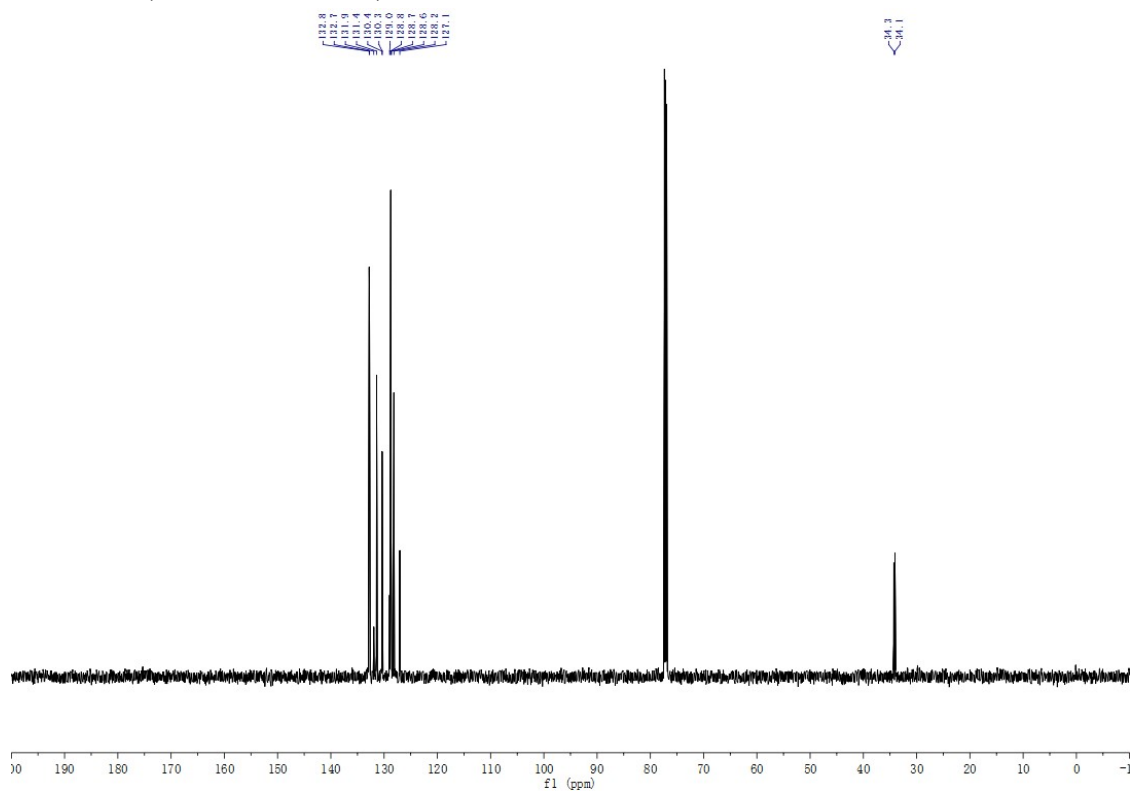

$^{31}\text{P}$  NMR (243 MHz,  $\text{CDCl}_3$ )

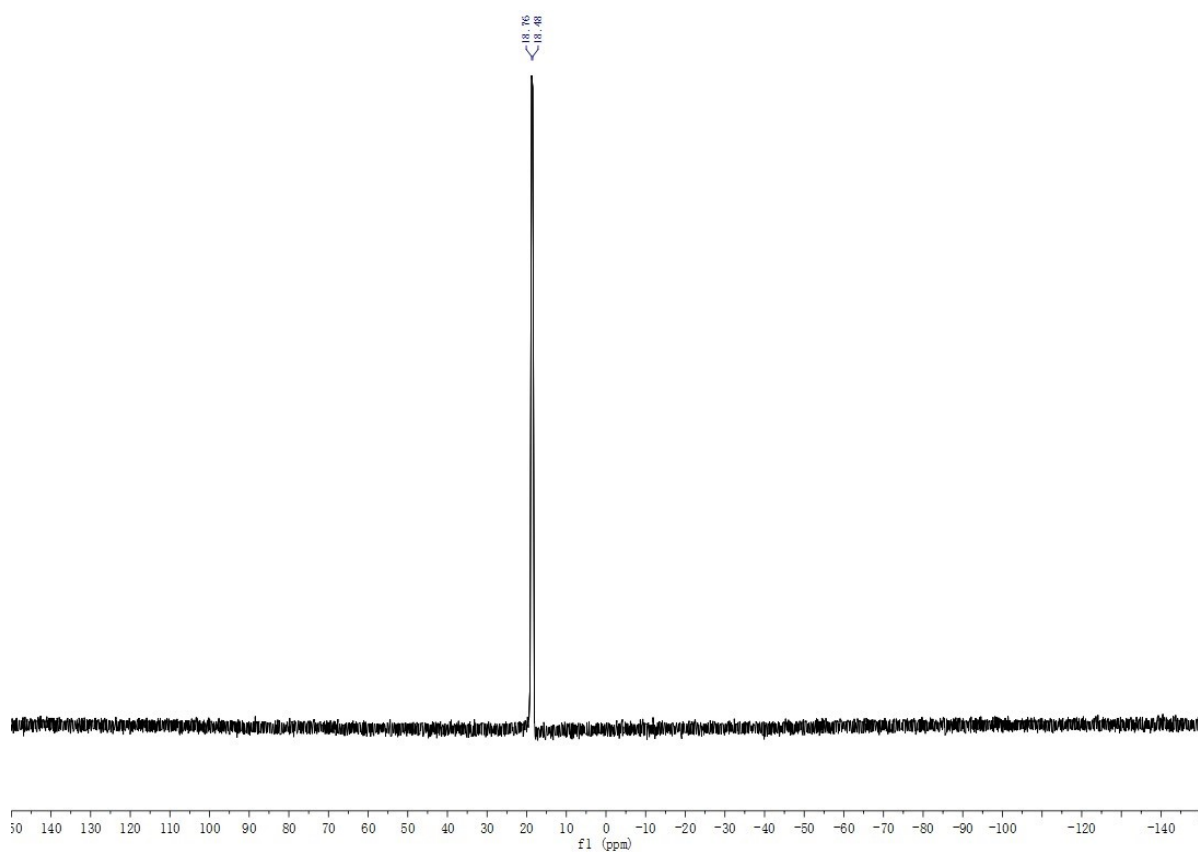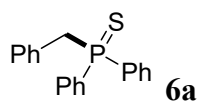

$^1\text{H}$  NMR (600 MHz,  $\text{CDCl}_3$ )

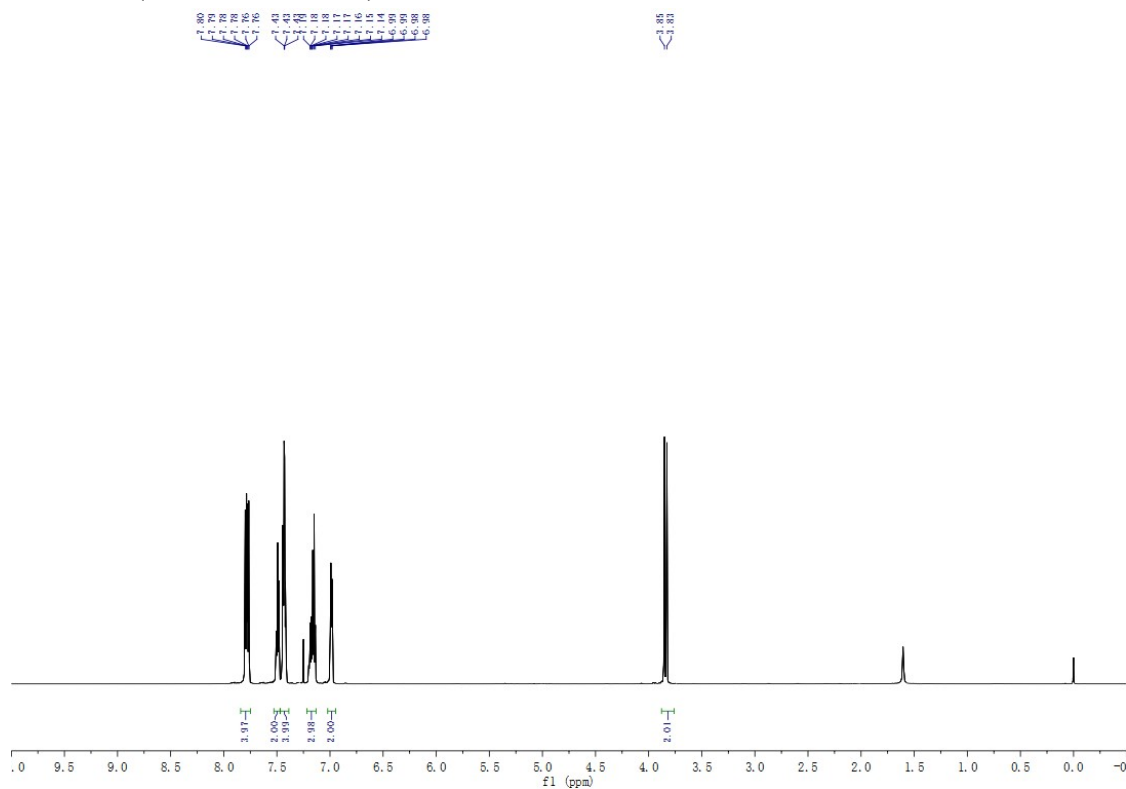

$^{13}\text{C}$  NMR (151 MHz,  $\text{CDCl}_3$ )

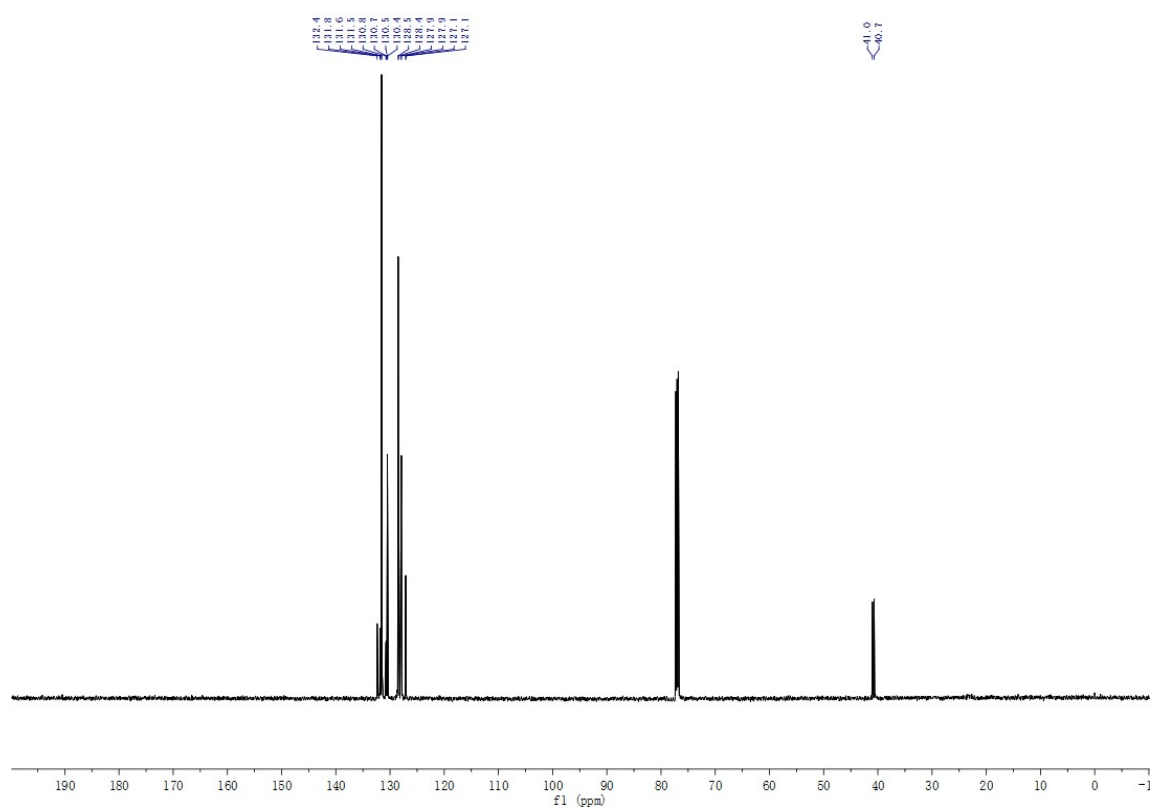

$^{31}\text{P}$  NMR (243 MHz,  $\text{CDCl}_3$ )

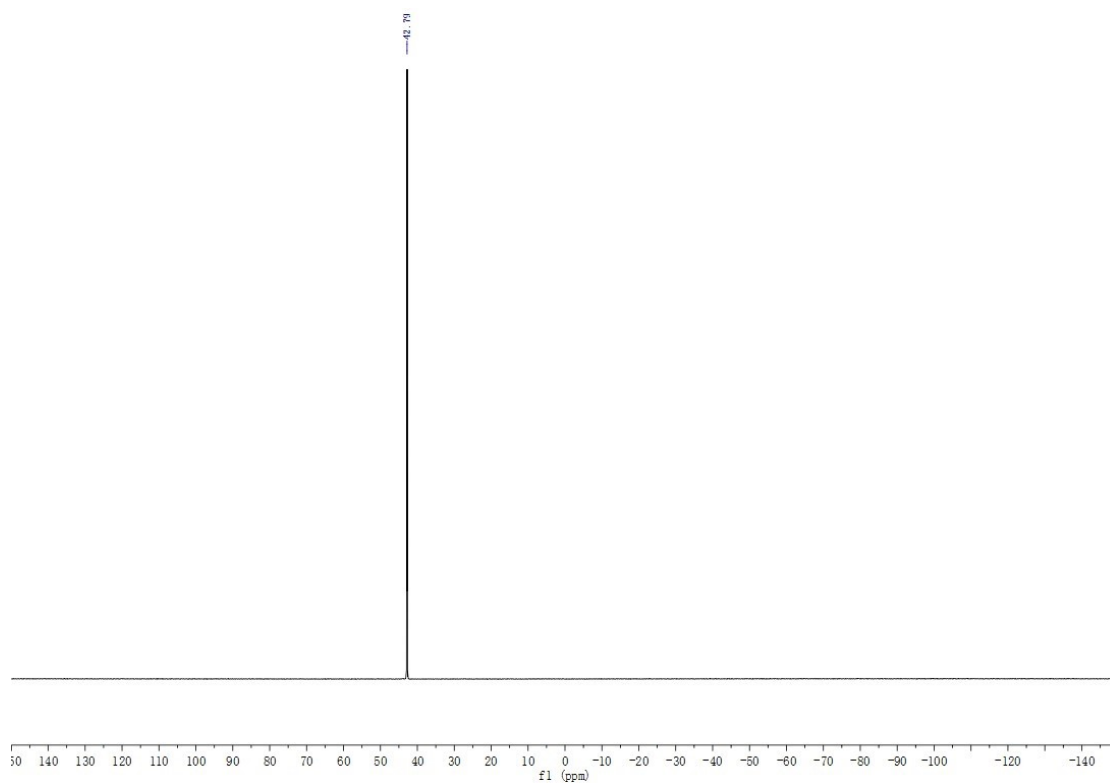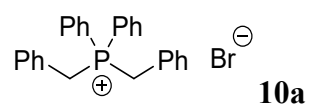

<sup>1</sup>H NMR (600 MHz, CDCl<sub>3</sub>)

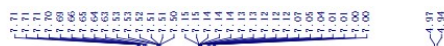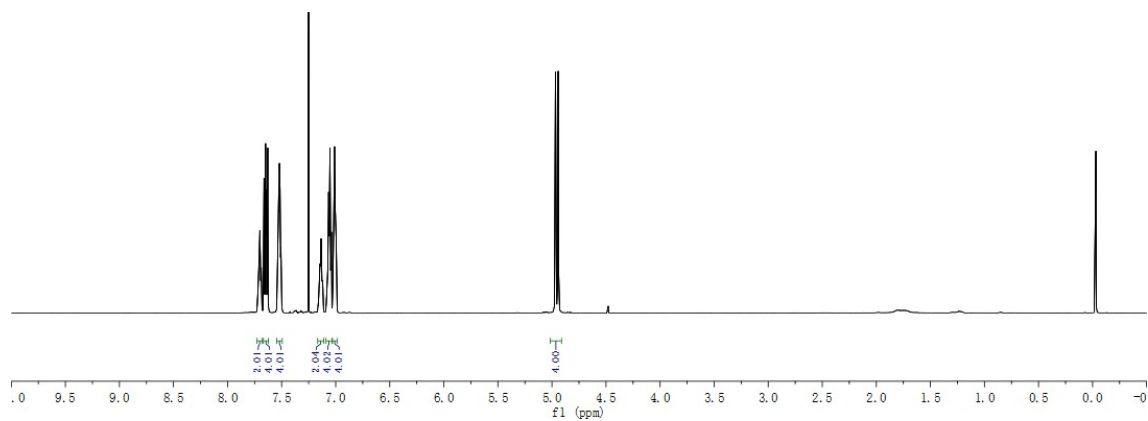

<sup>13</sup>C NMR (151 MHz, CDCl<sub>3</sub>)

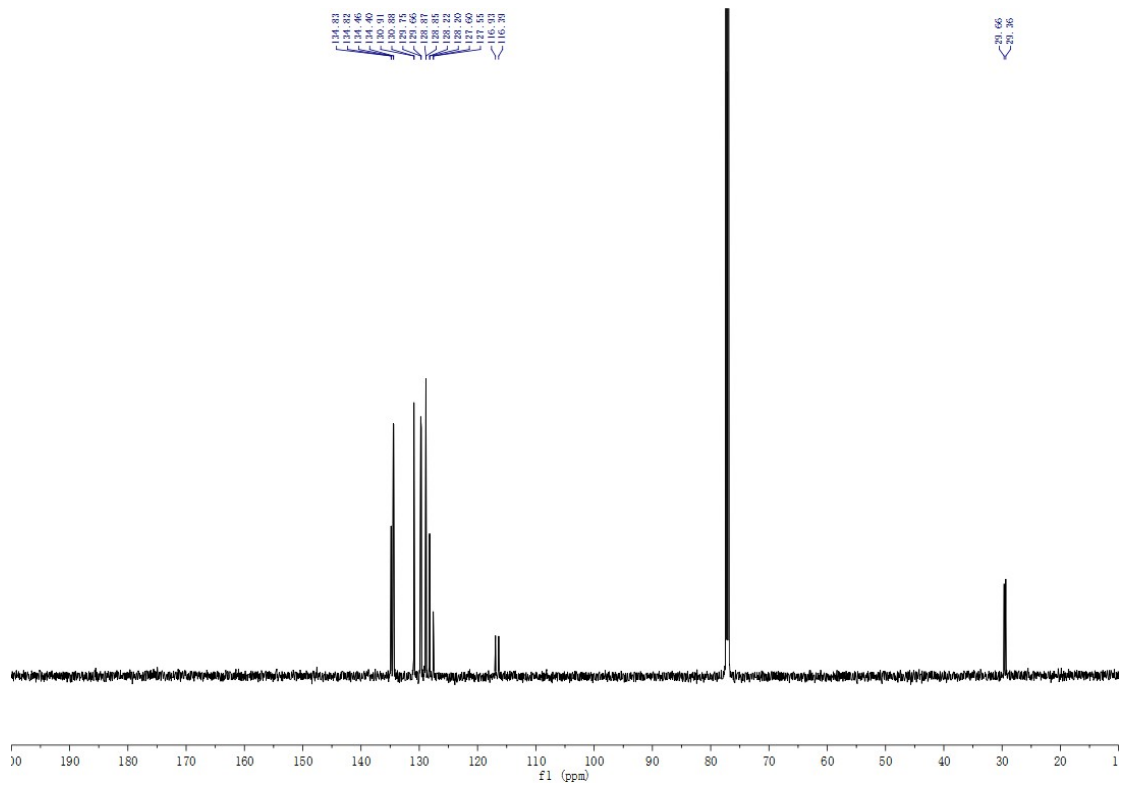

$^{31}\text{P}$  NMR (243 MHz,  $\text{CDCl}_3$ )

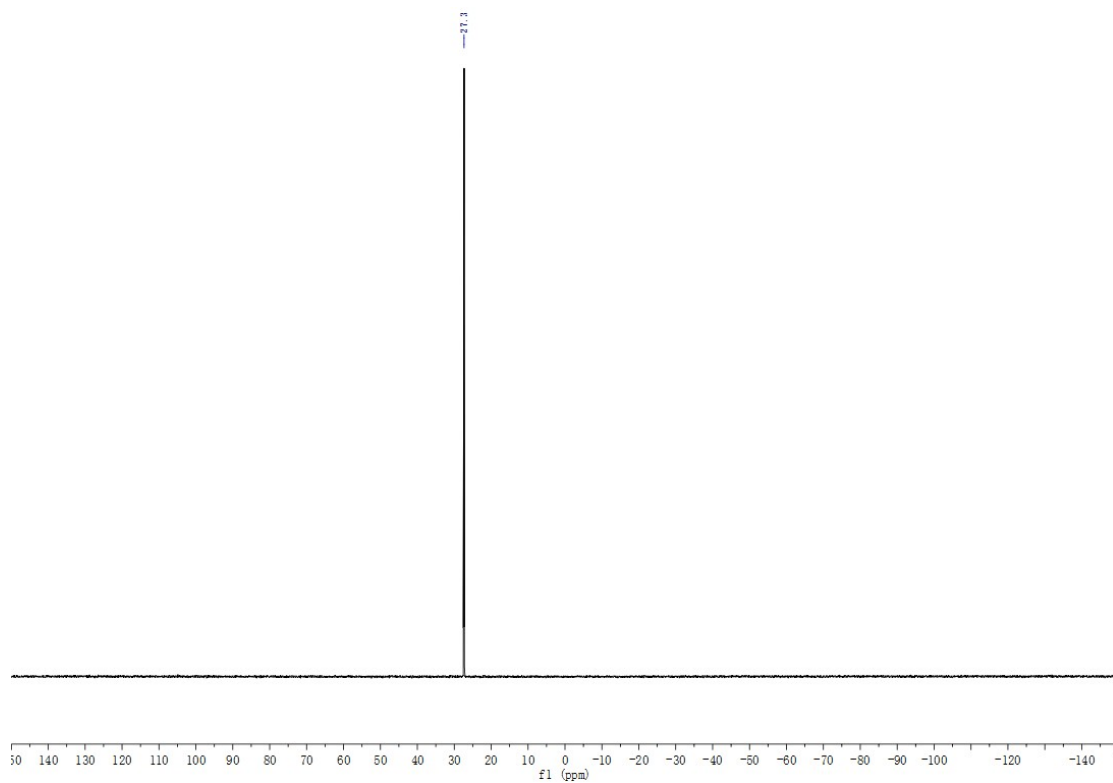

Supplement: d4gc04409f1.pdf [file d4gc04409f1.pdf]
